# Supplementary material for: An ensemble learning approach to reverse-engineering transcriptional regulatory networks from time-series gene expression data
Source: PubMed Central journal article supplement (PMC2709269; doi:10.1186/1471-2164-10-s1-s8), 2009-07-07

**Supplementary Figure 2.** Rule profiles that do not show clear cell-cycle dependency.

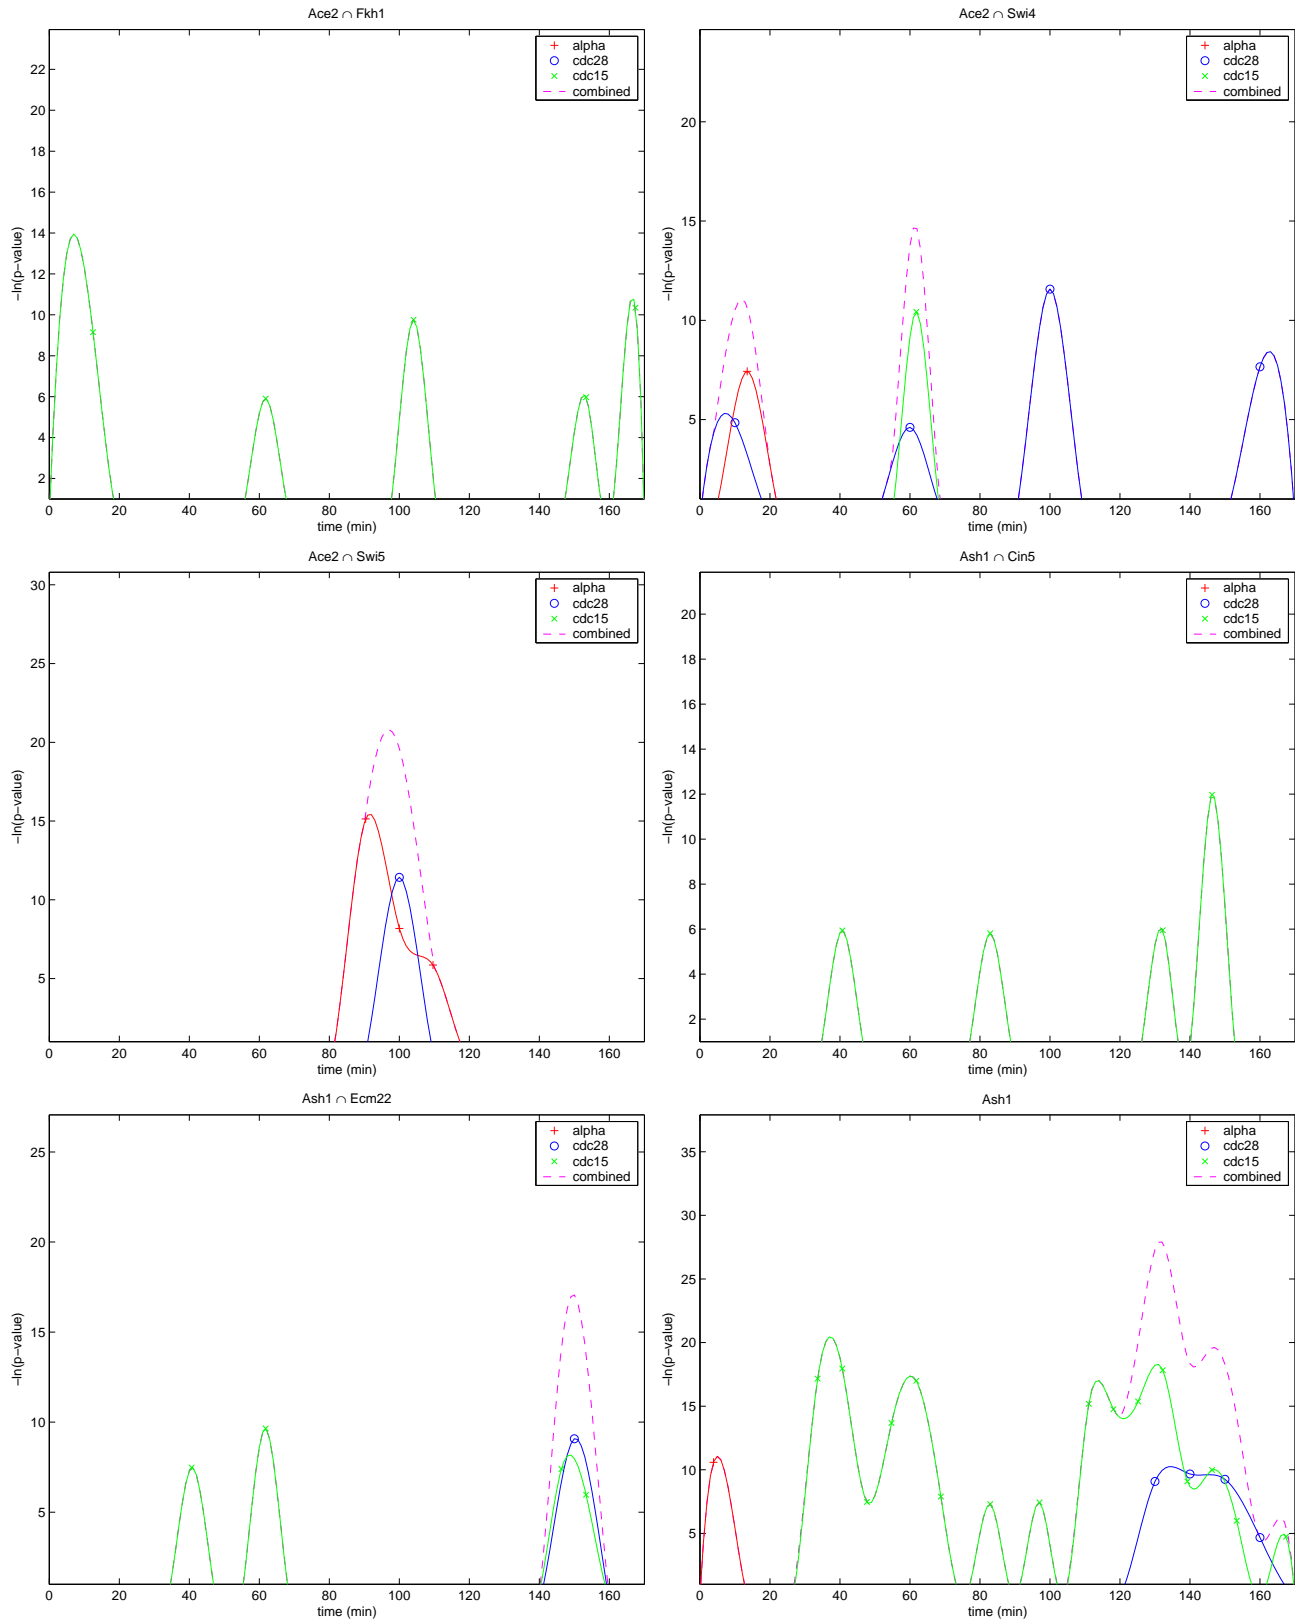

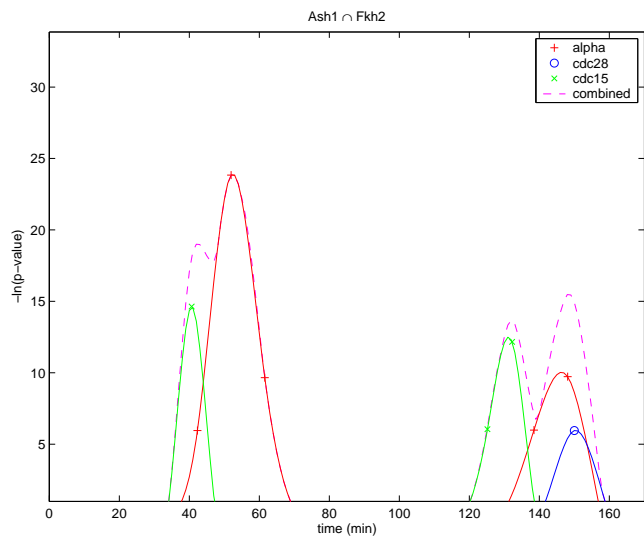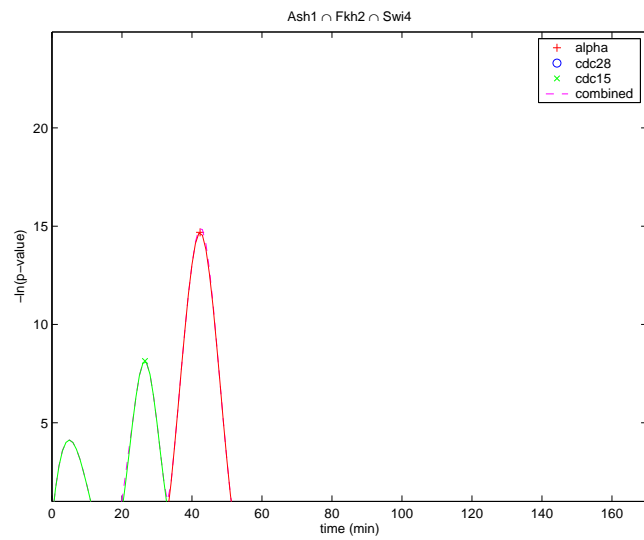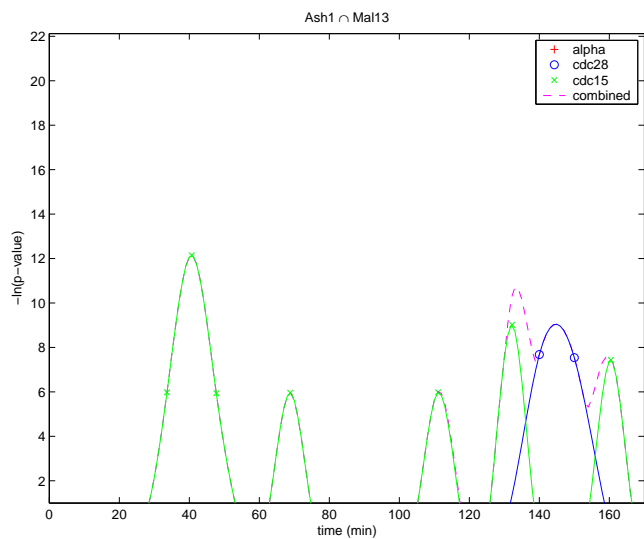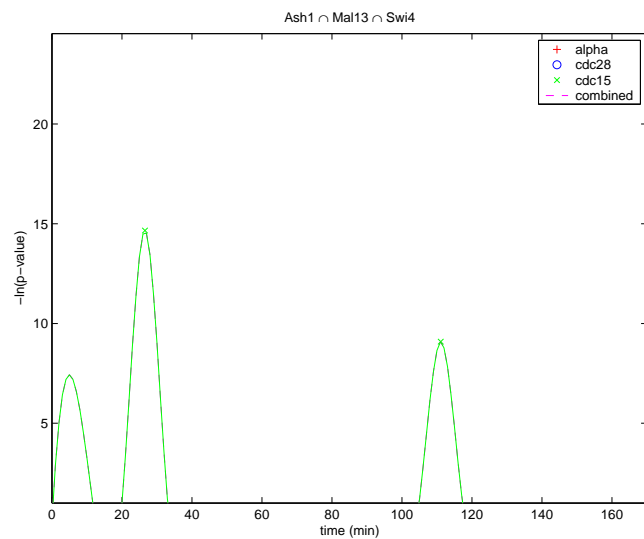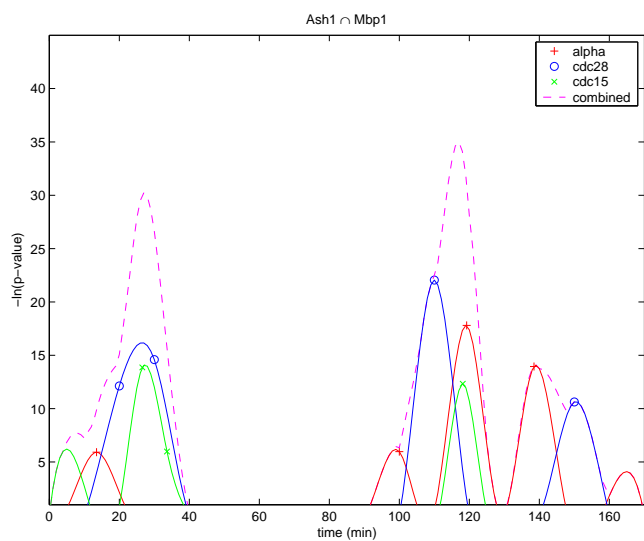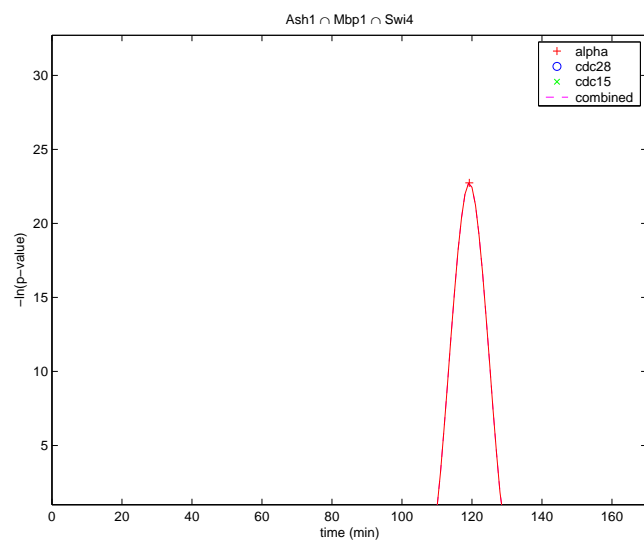

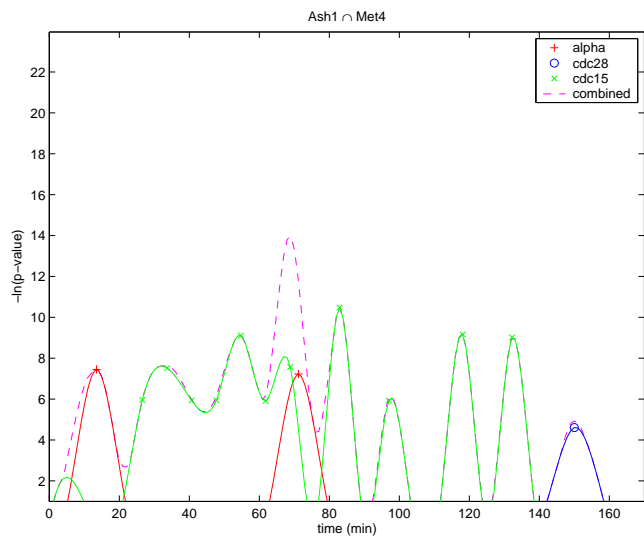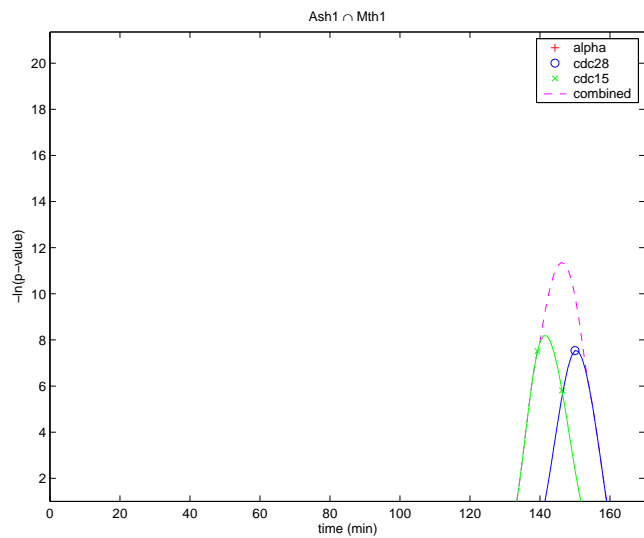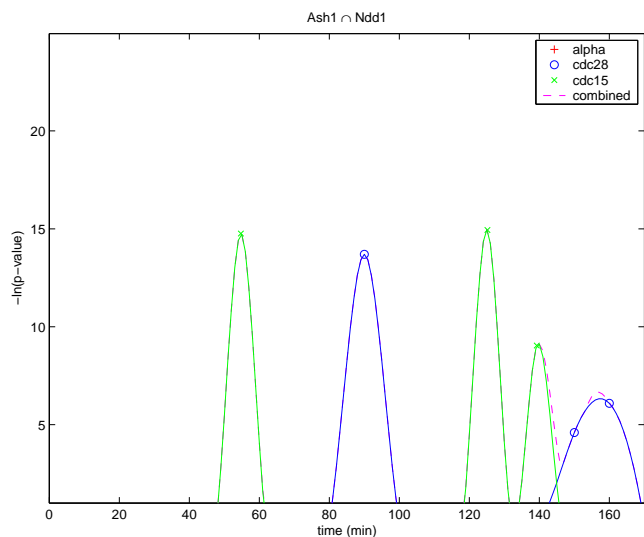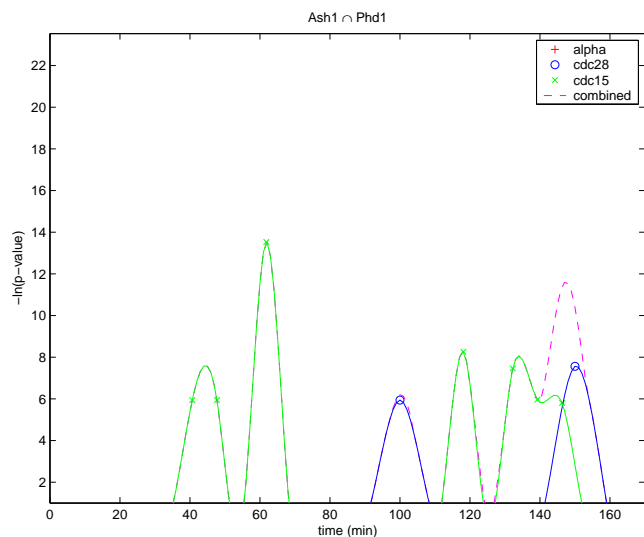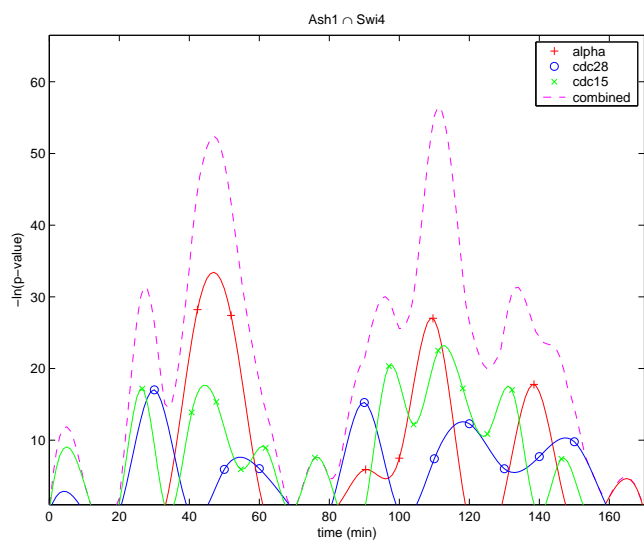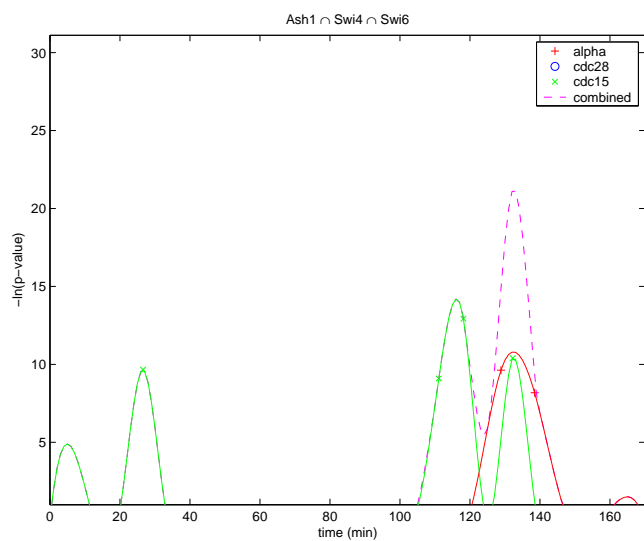

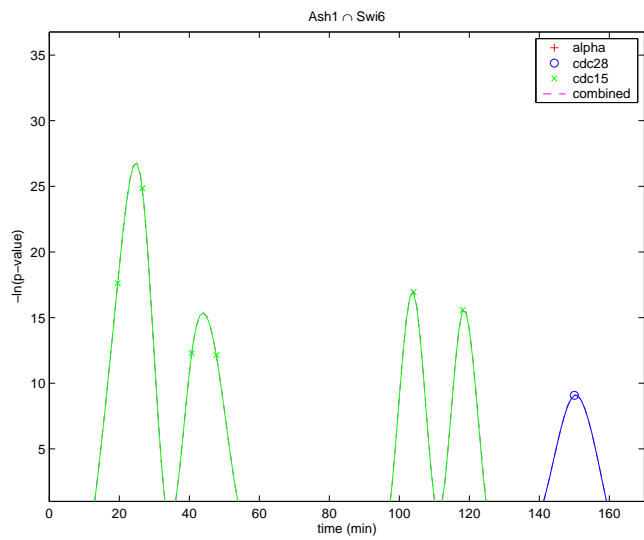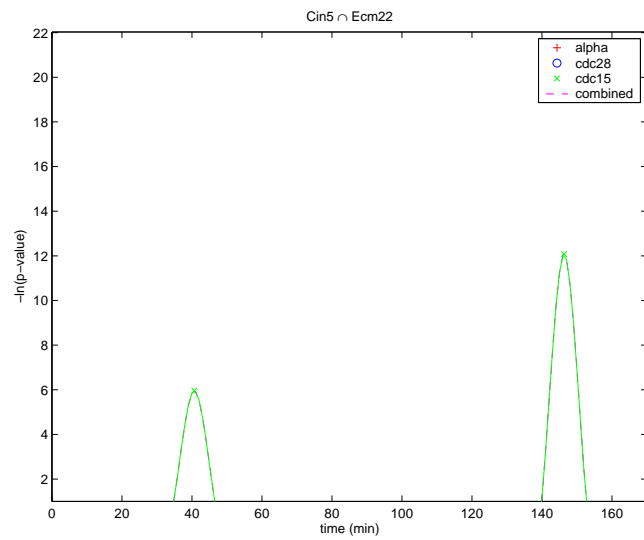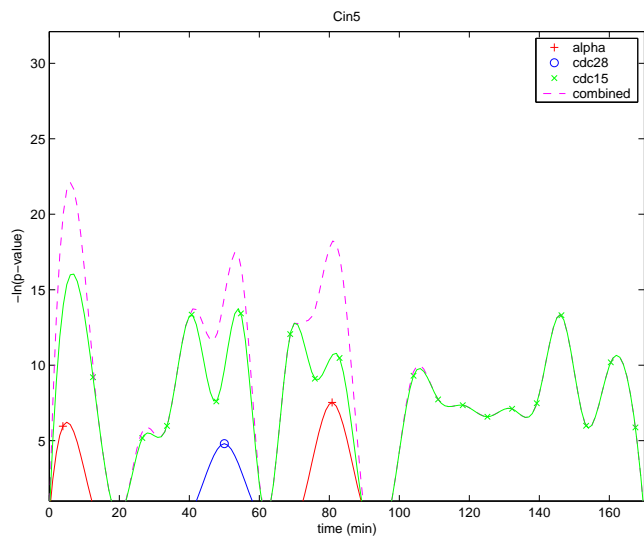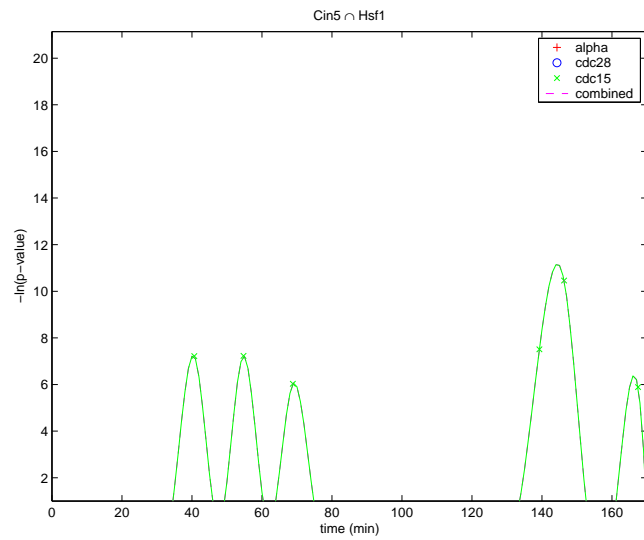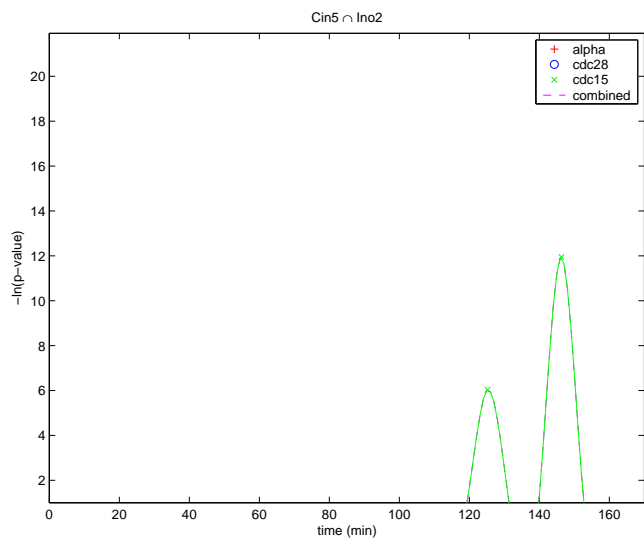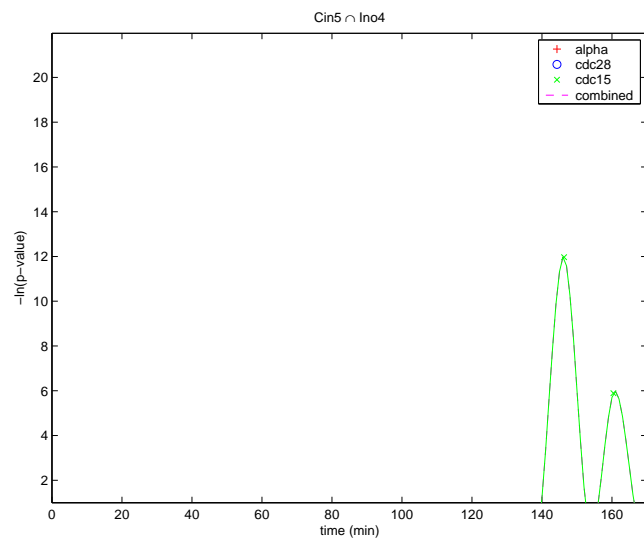

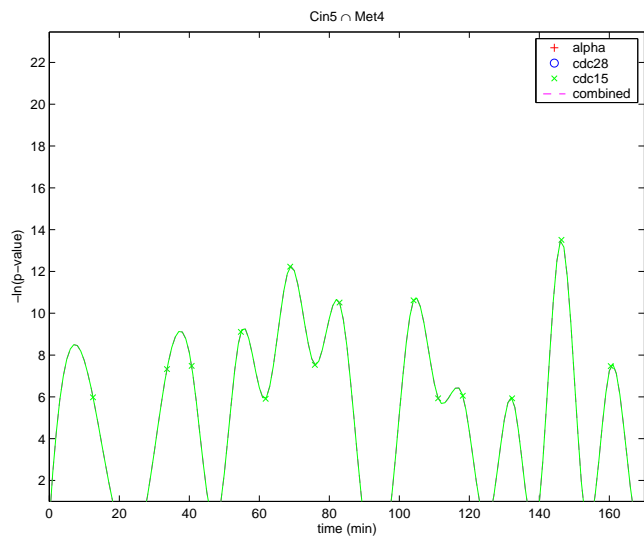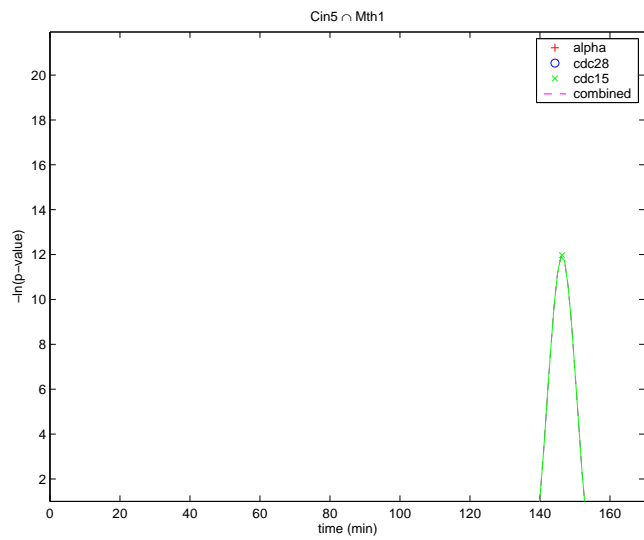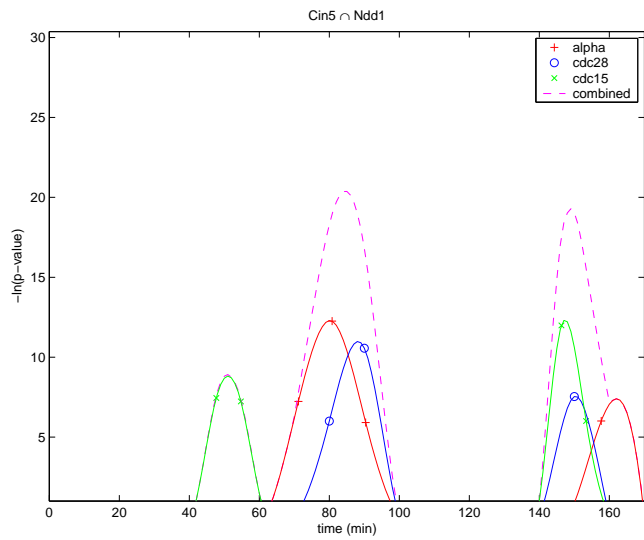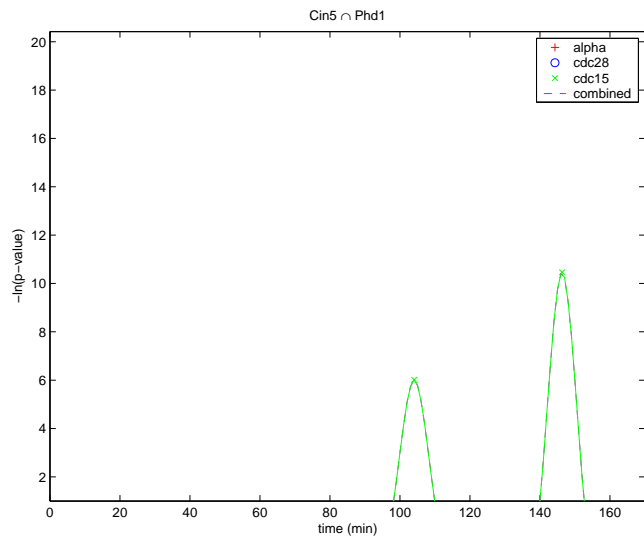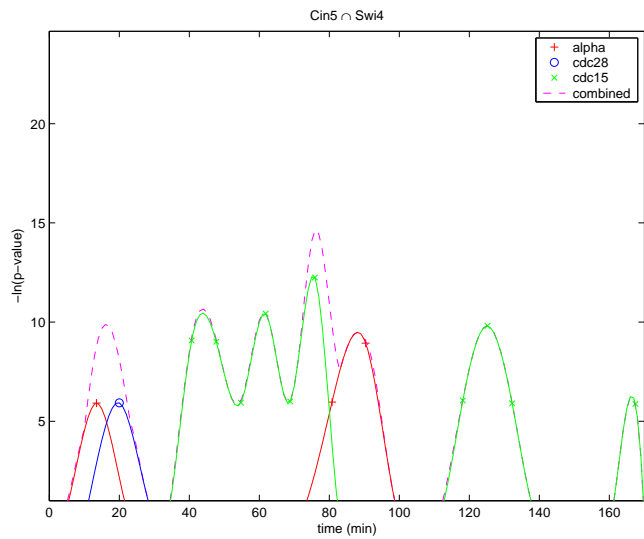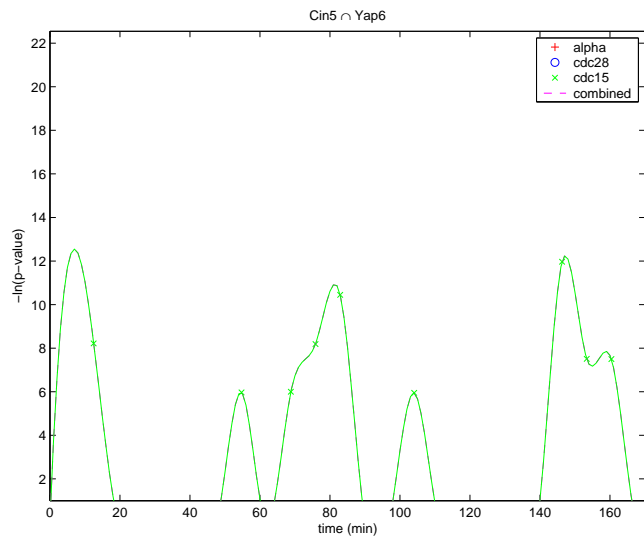

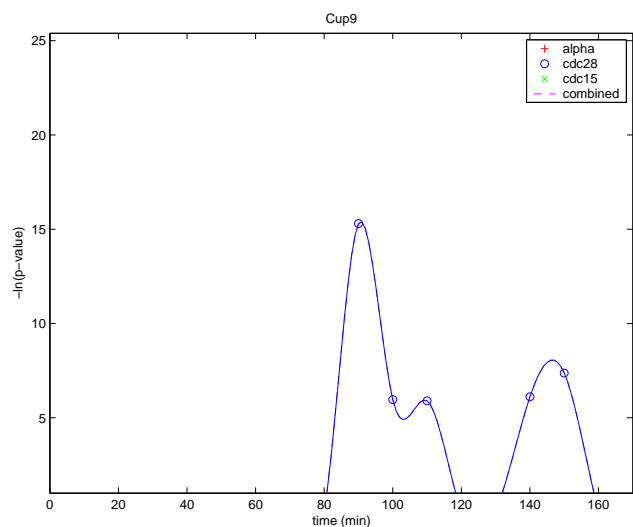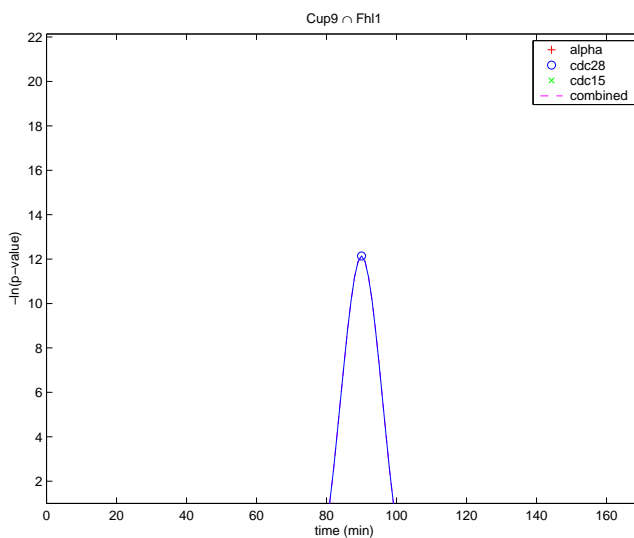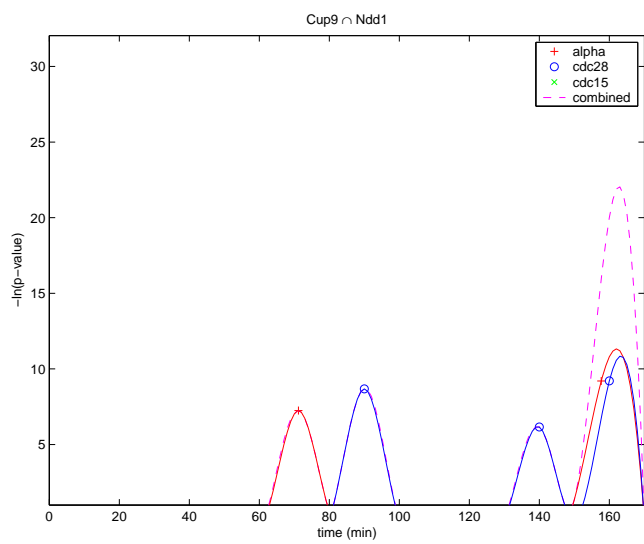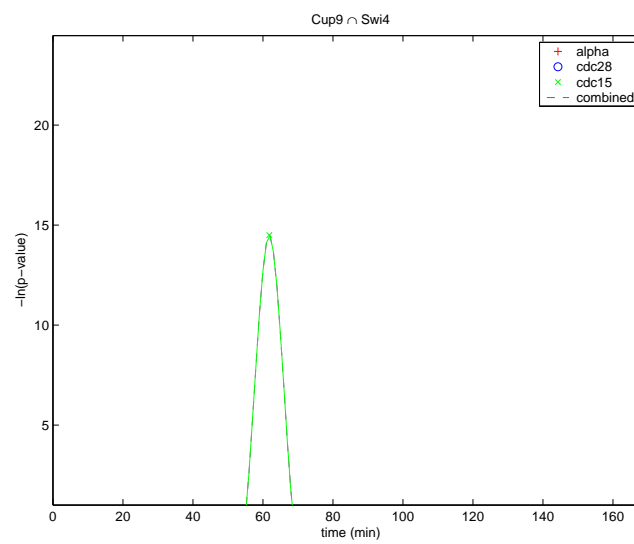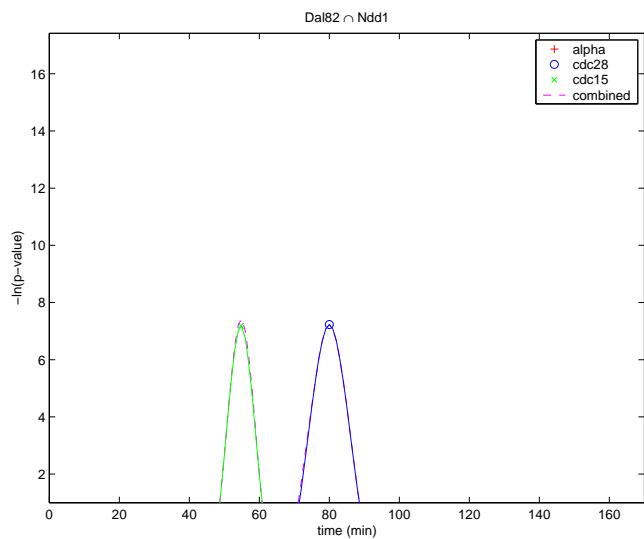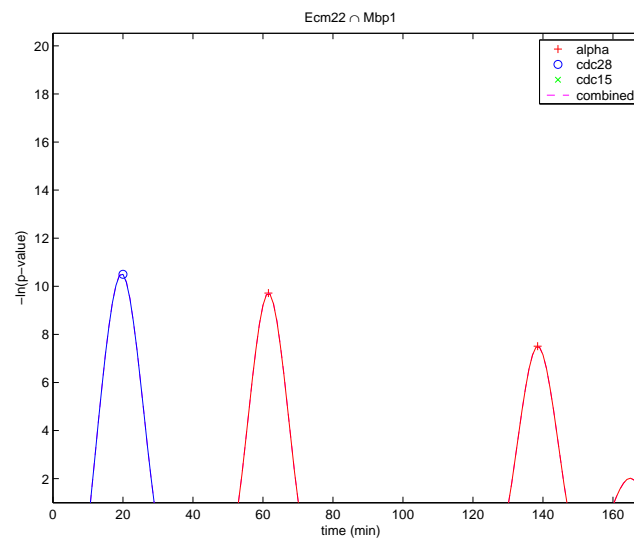

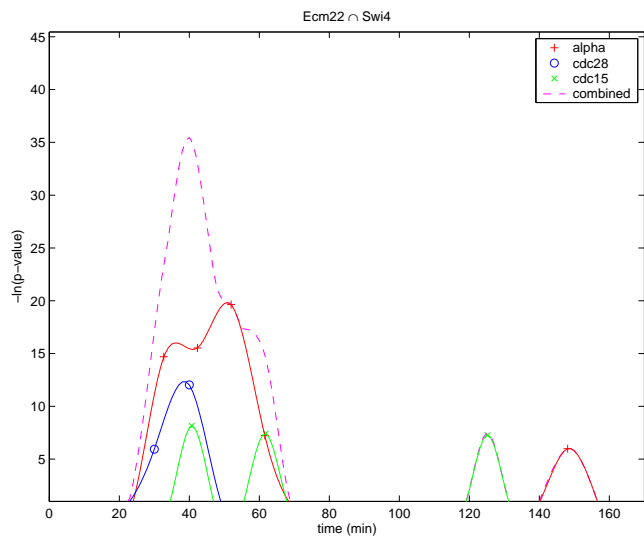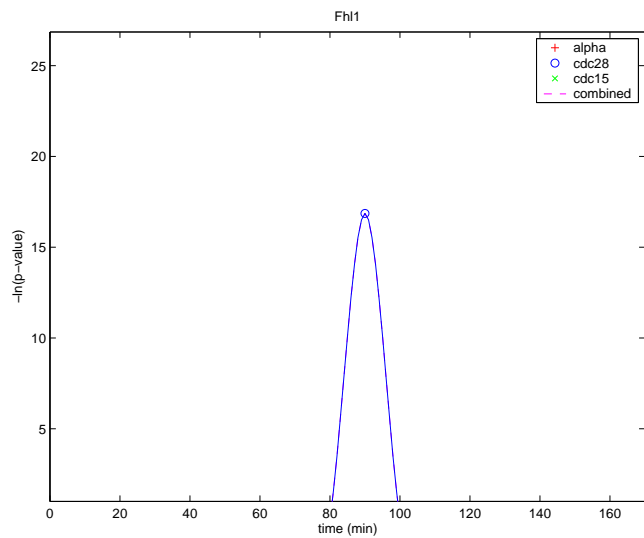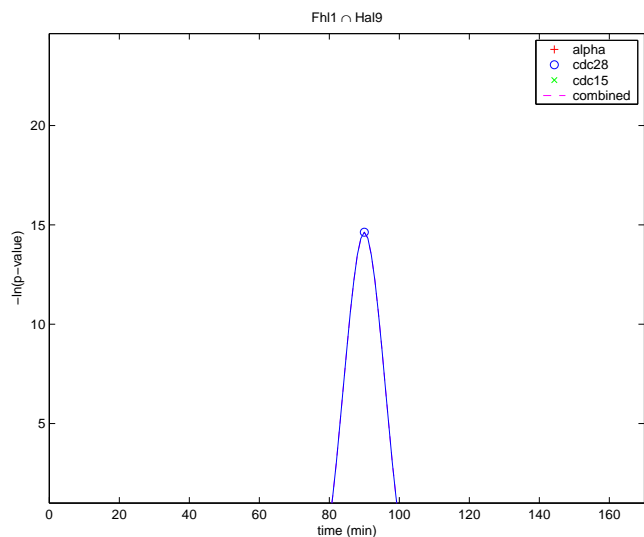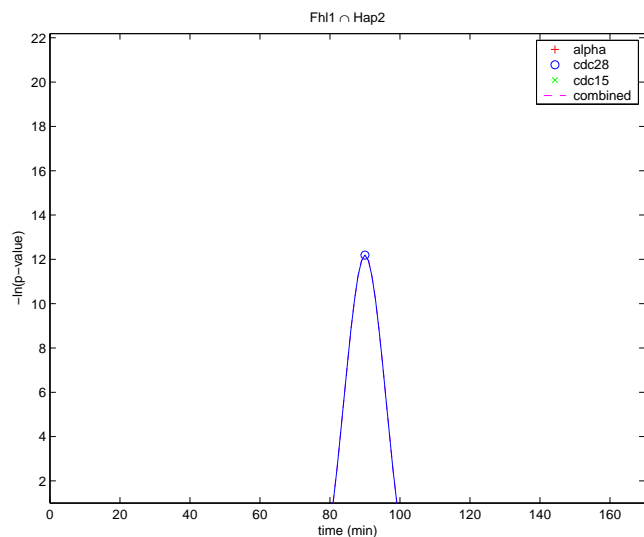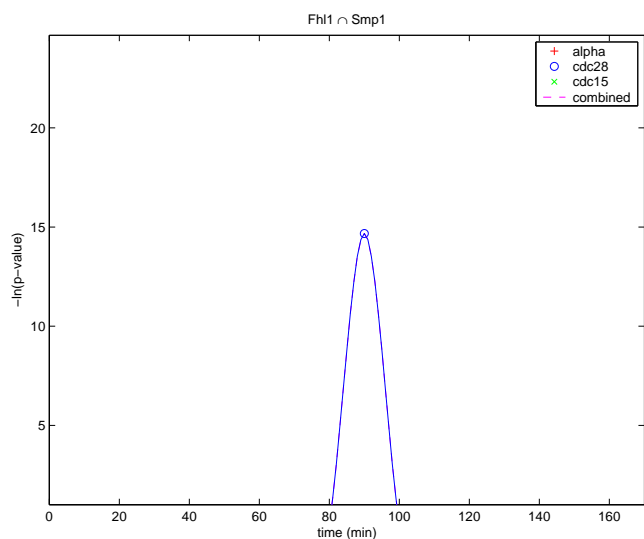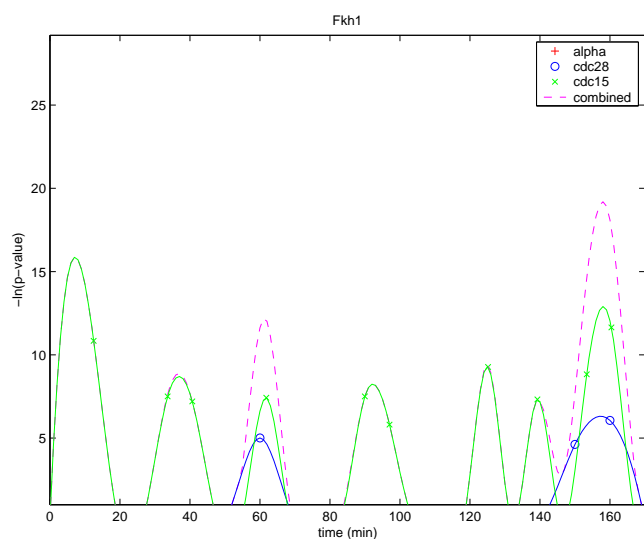

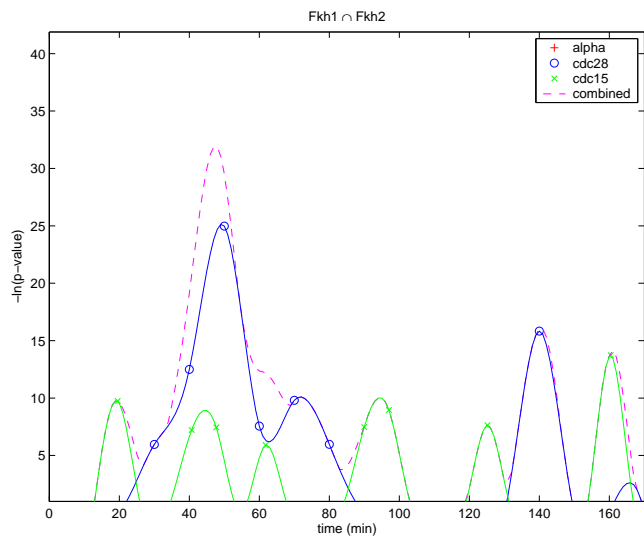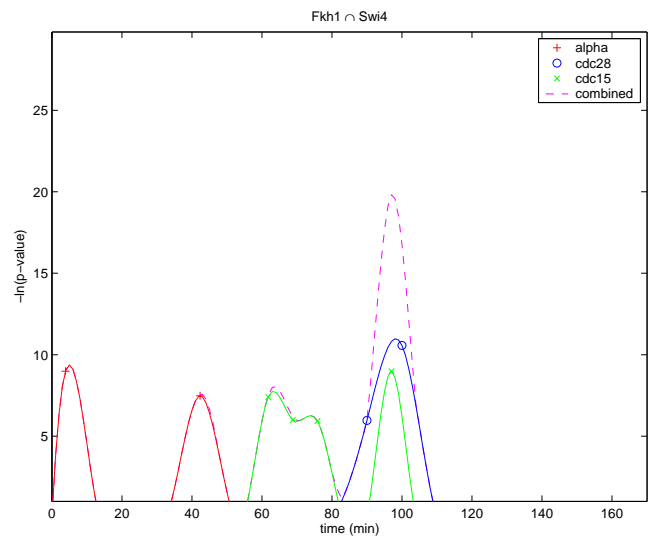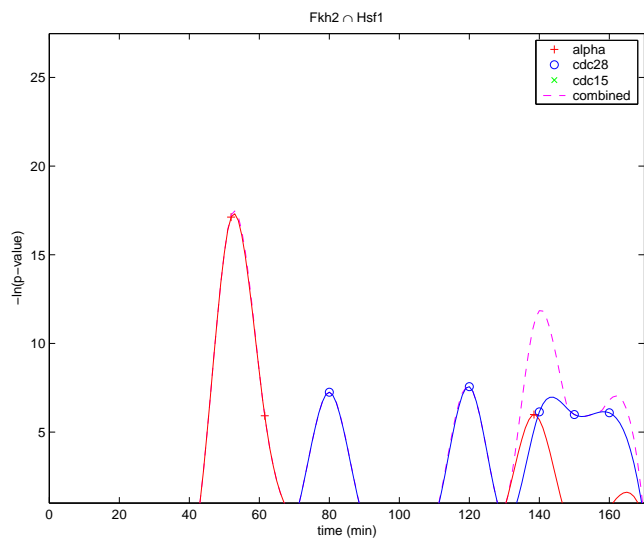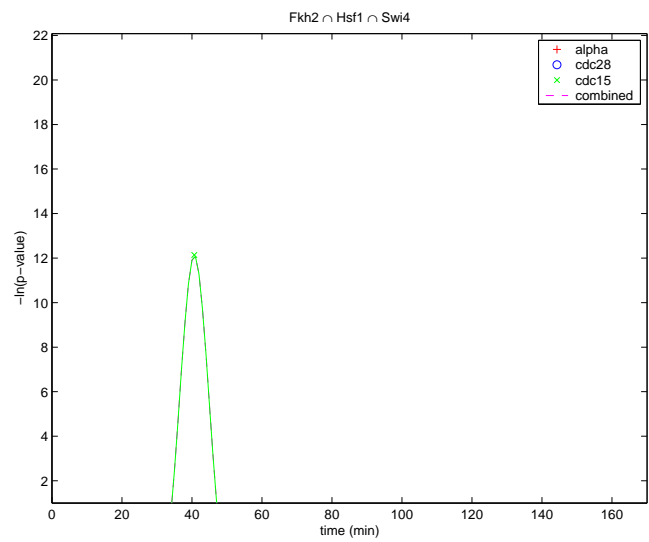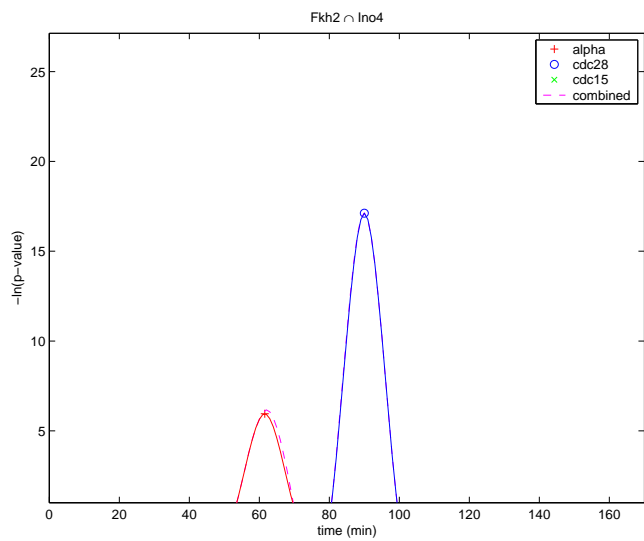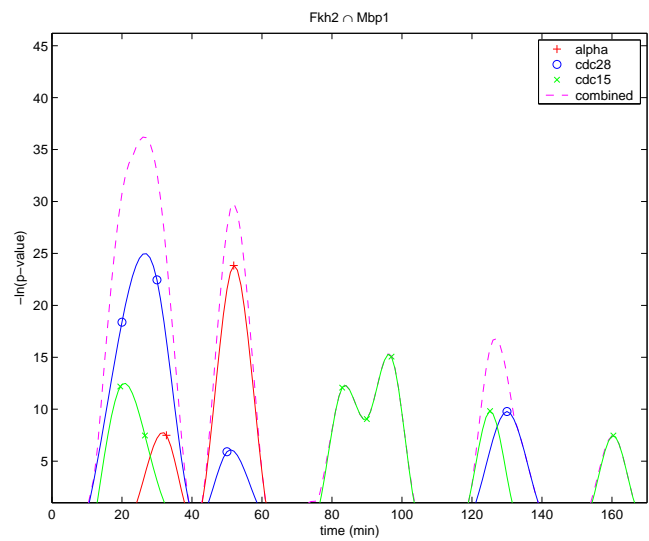



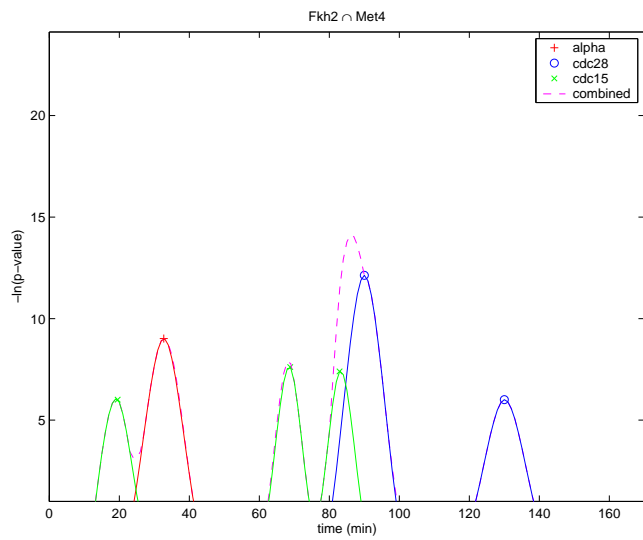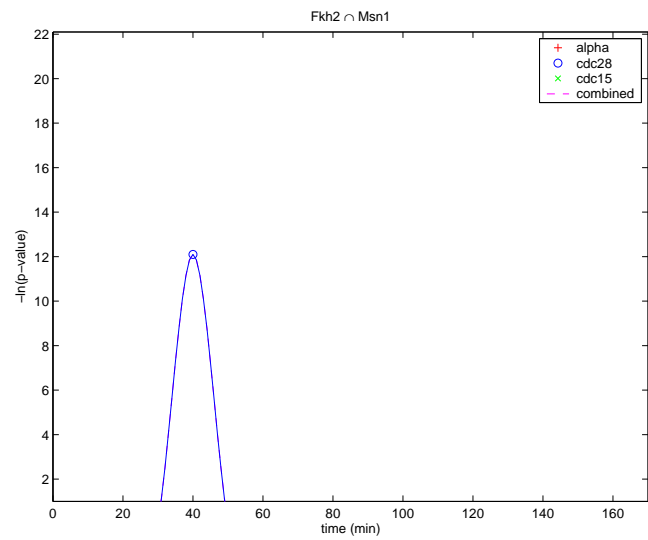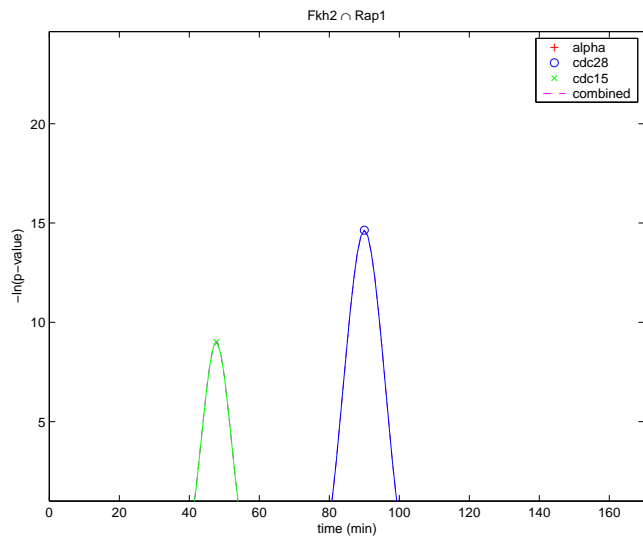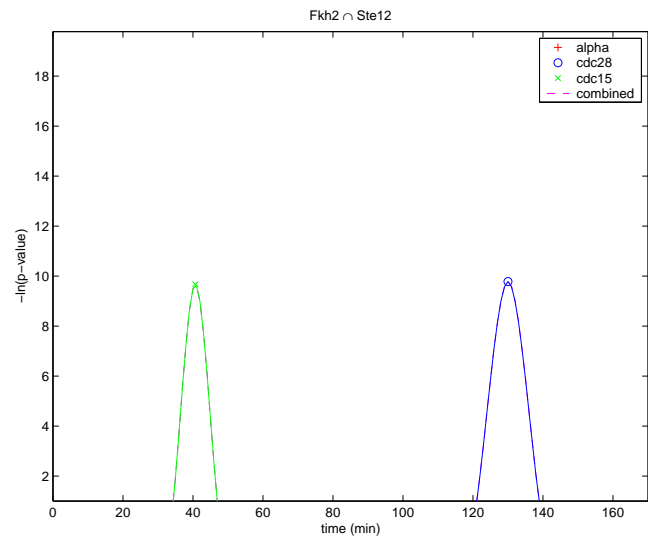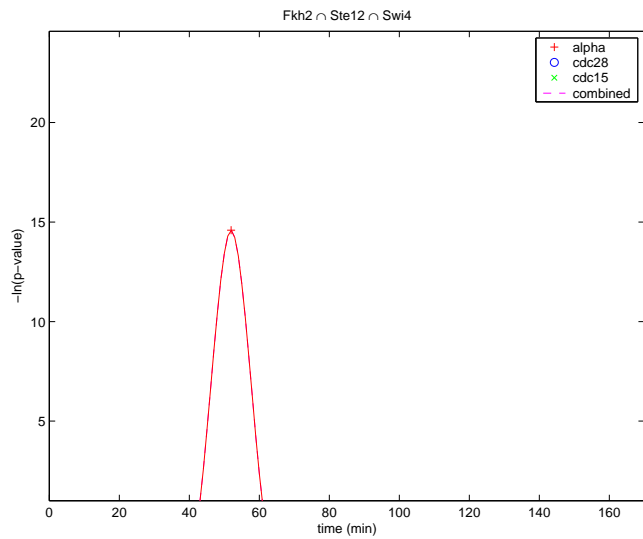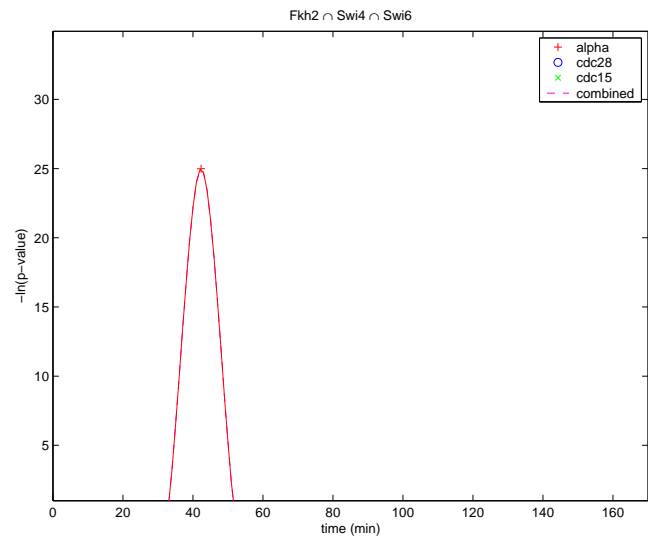

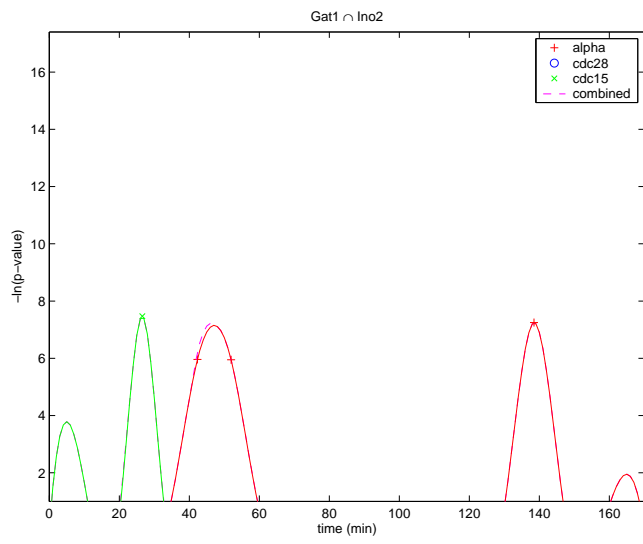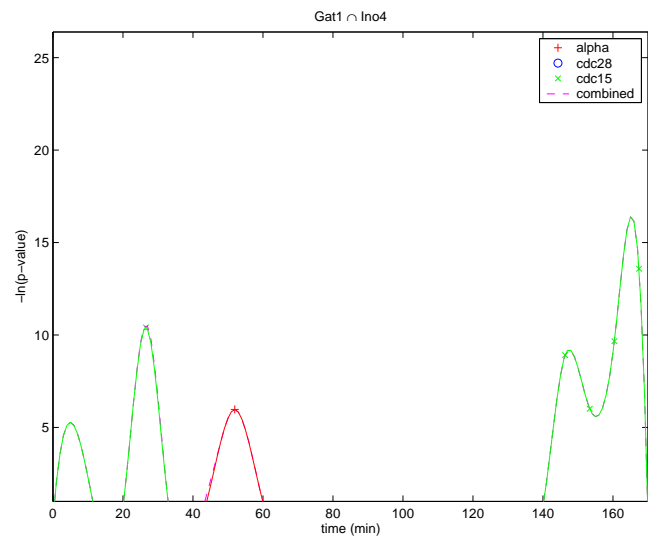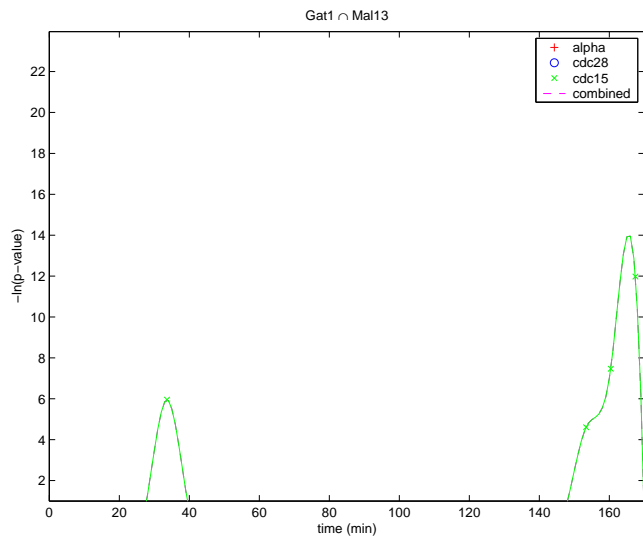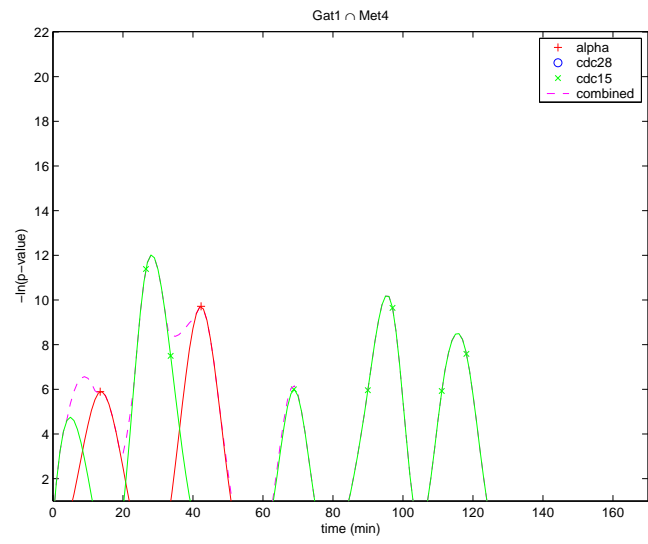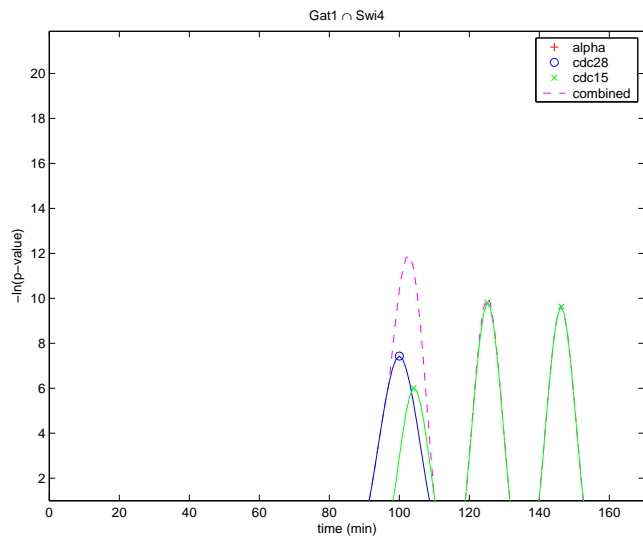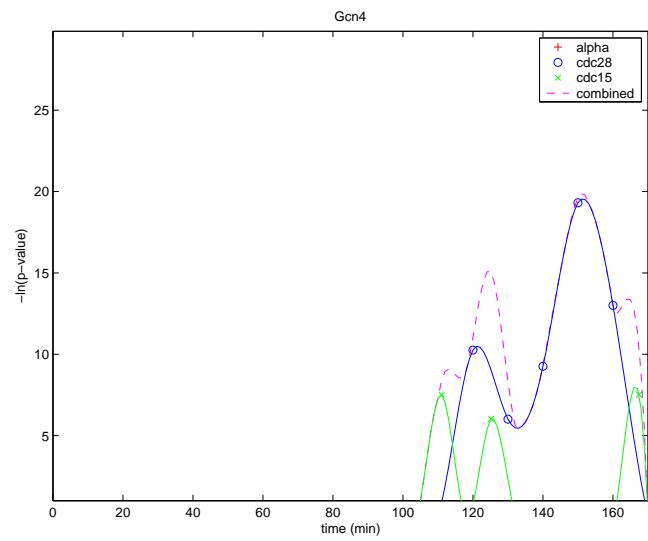

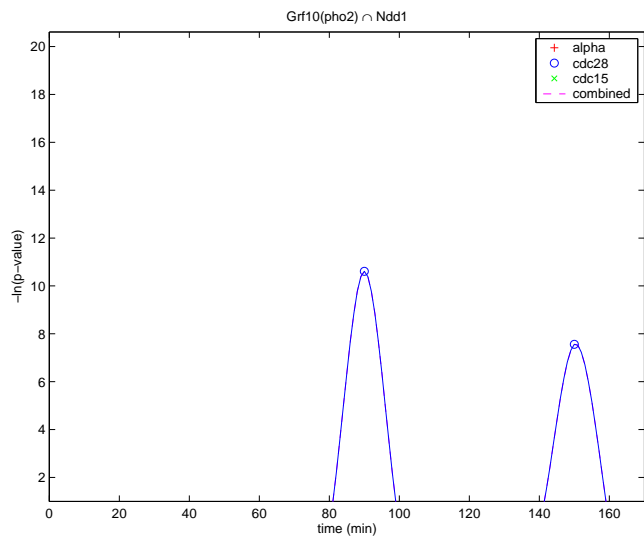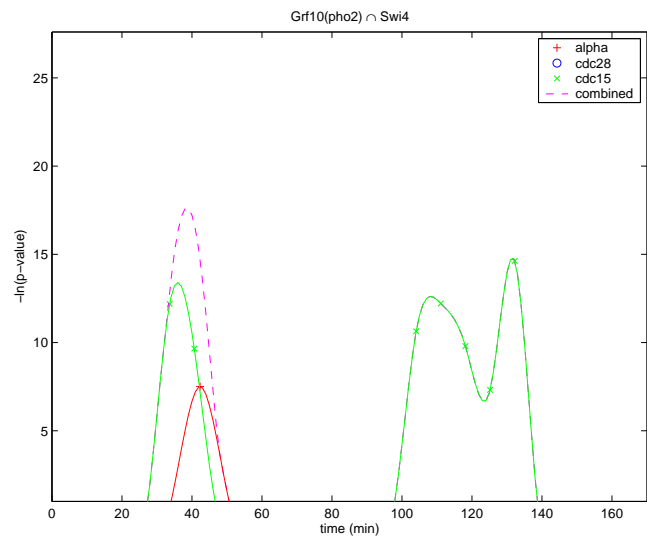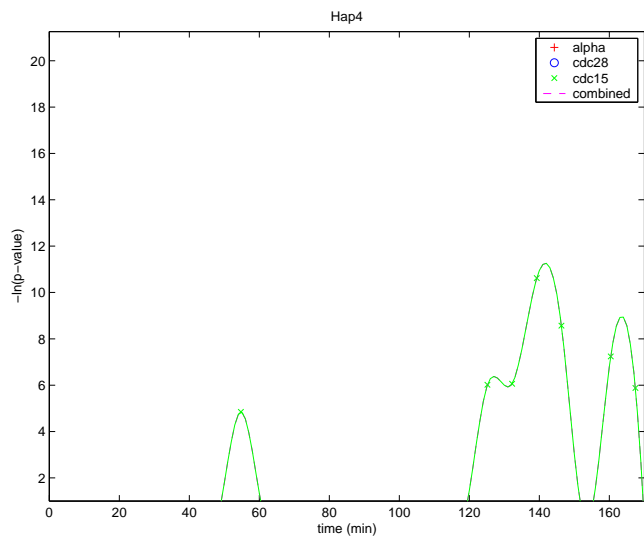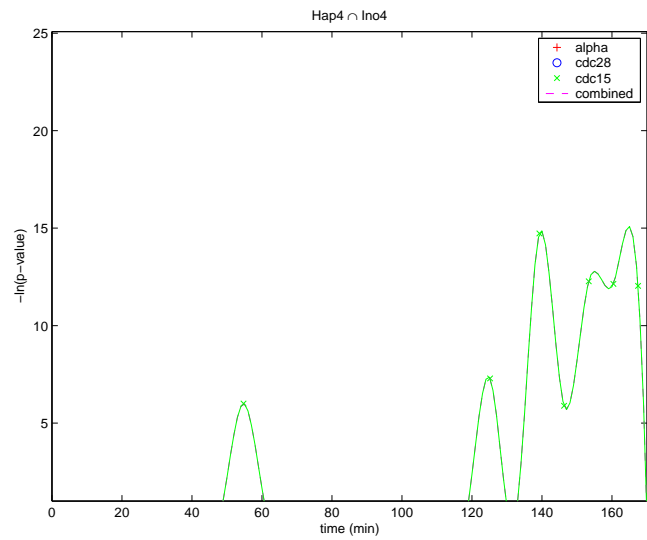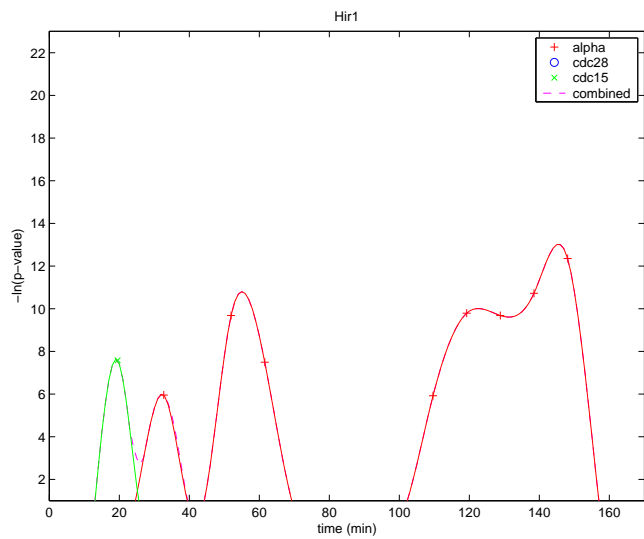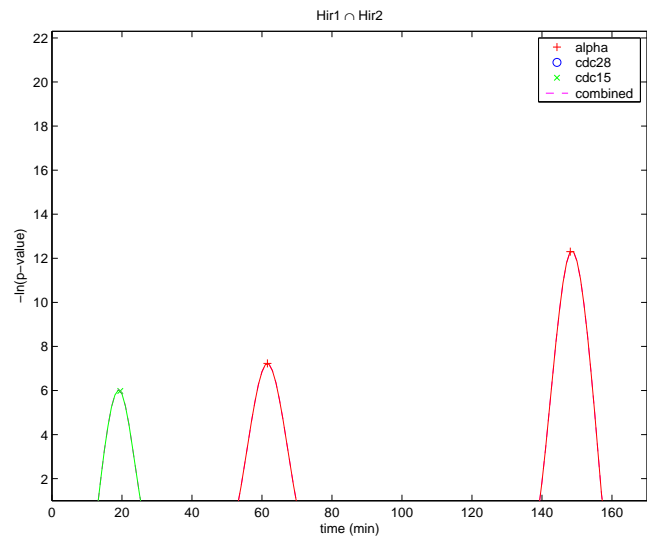

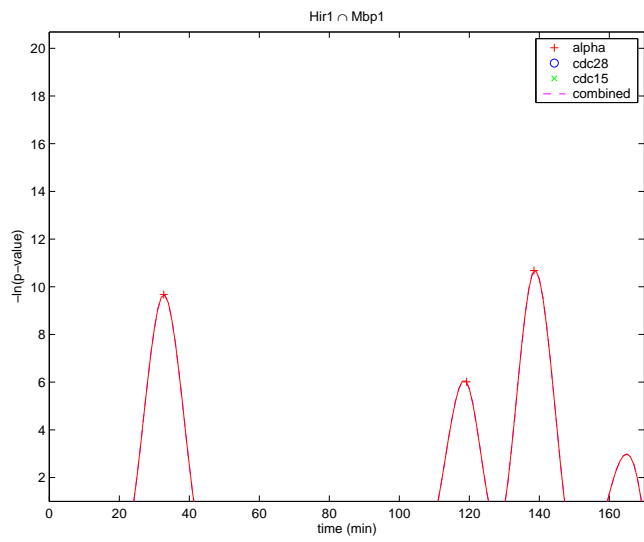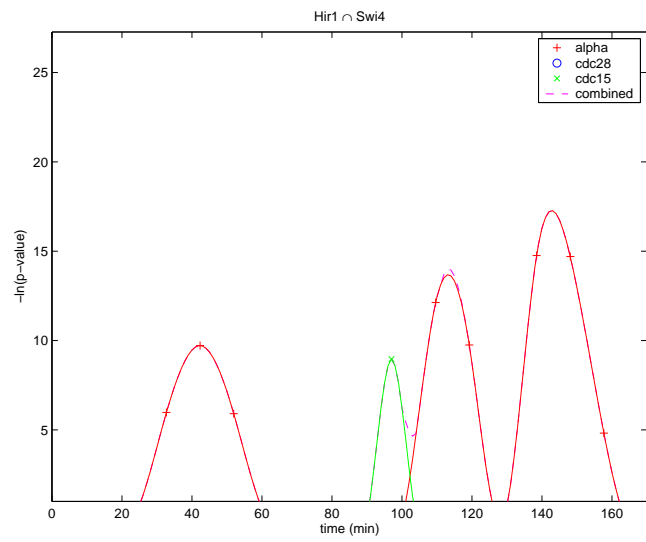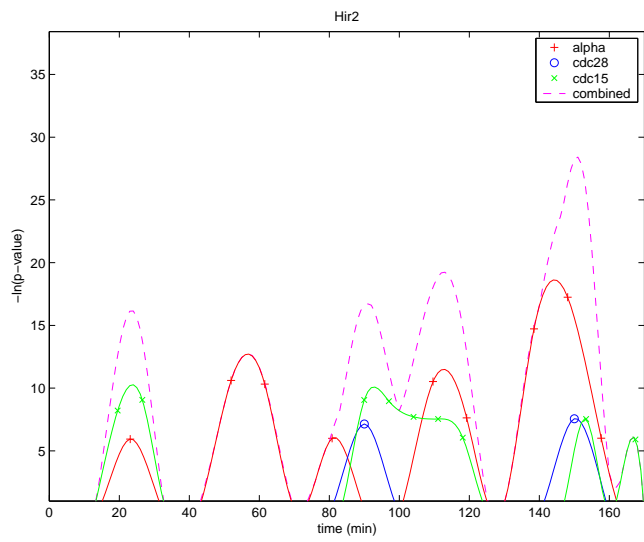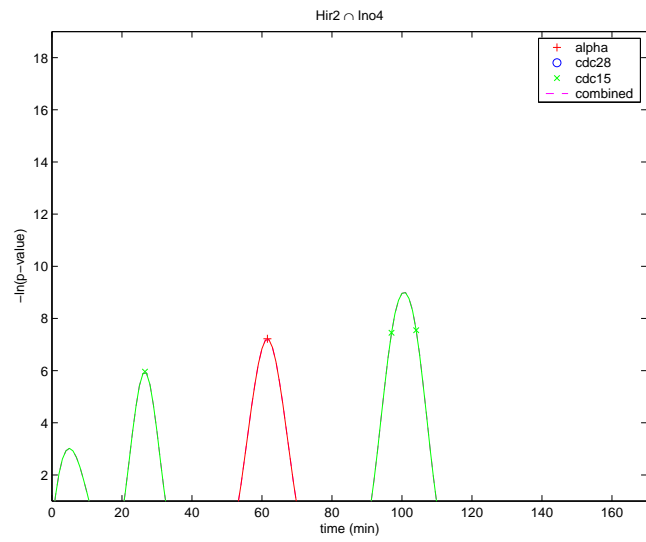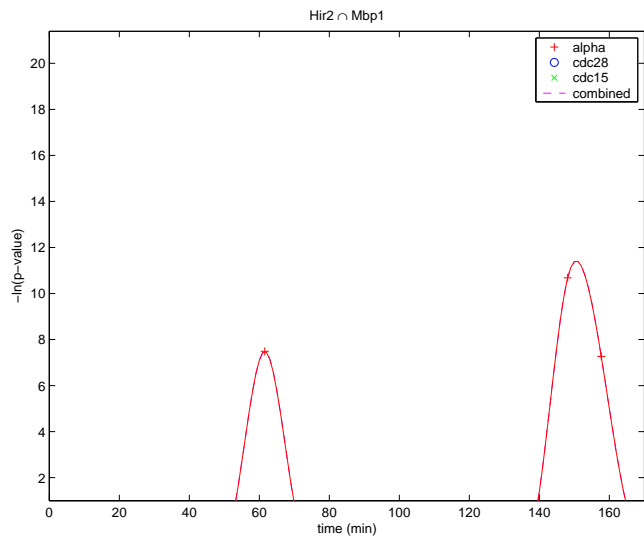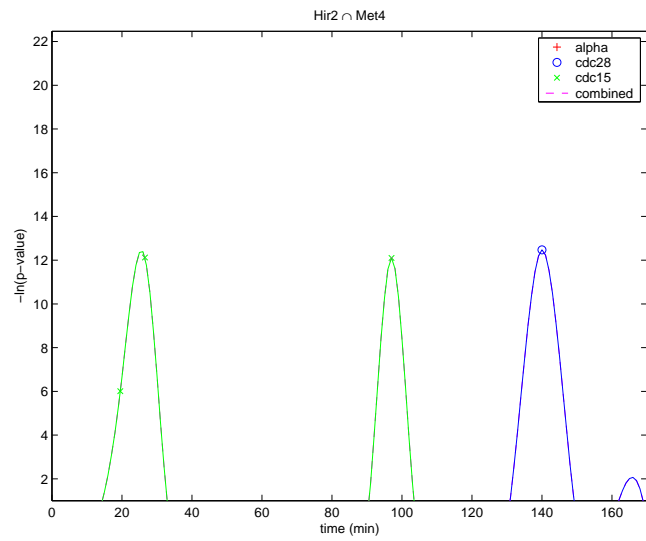

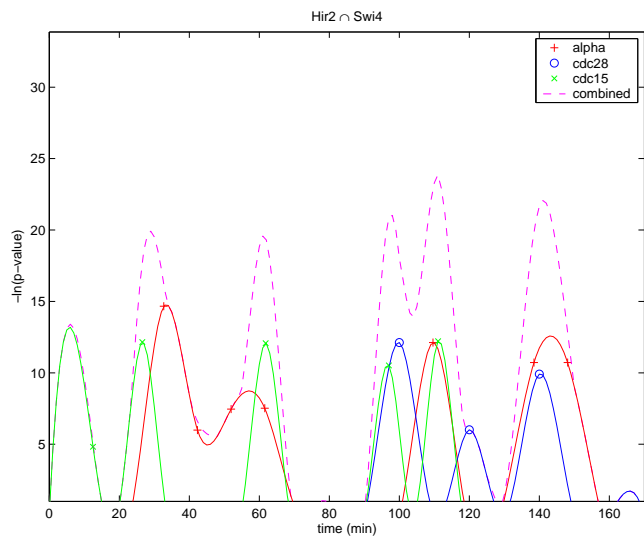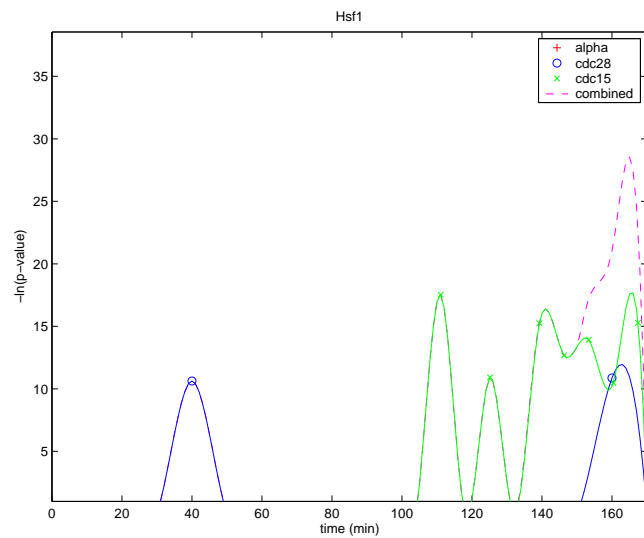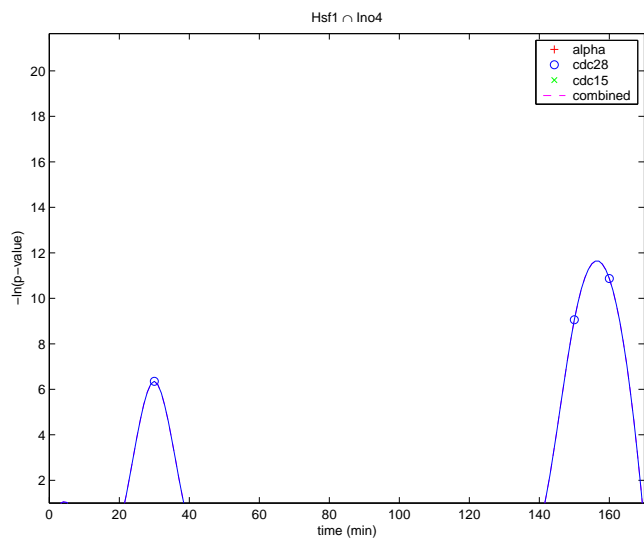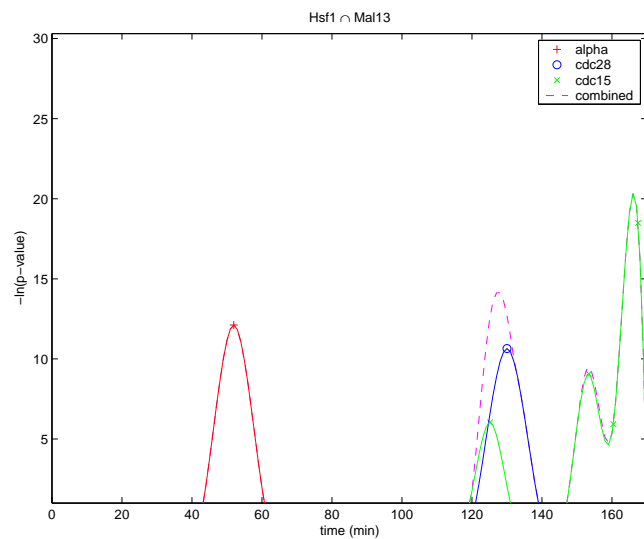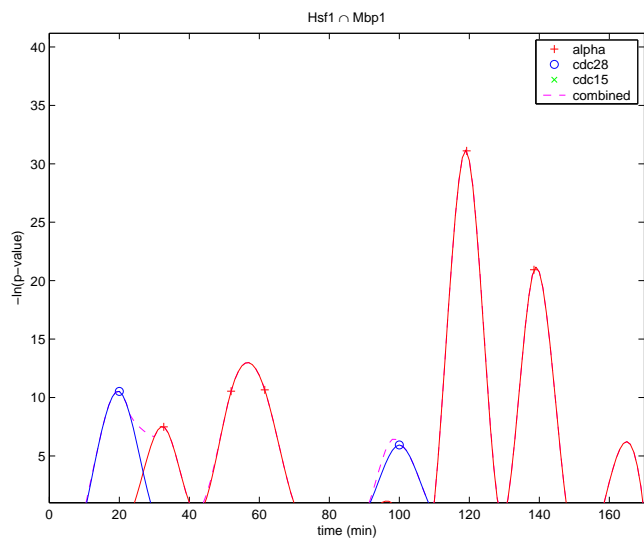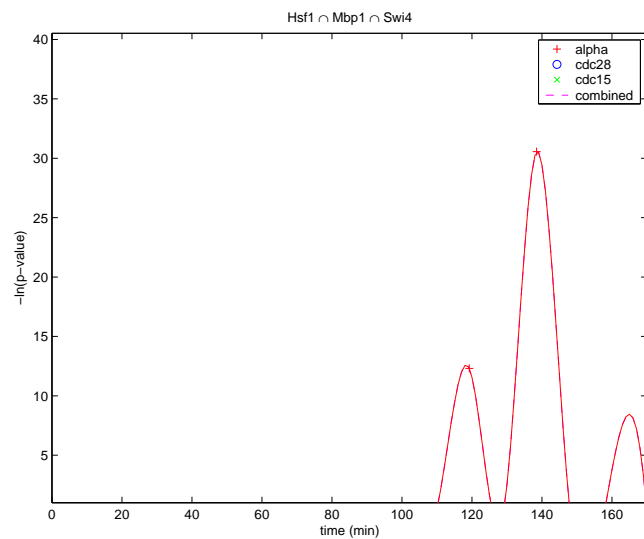

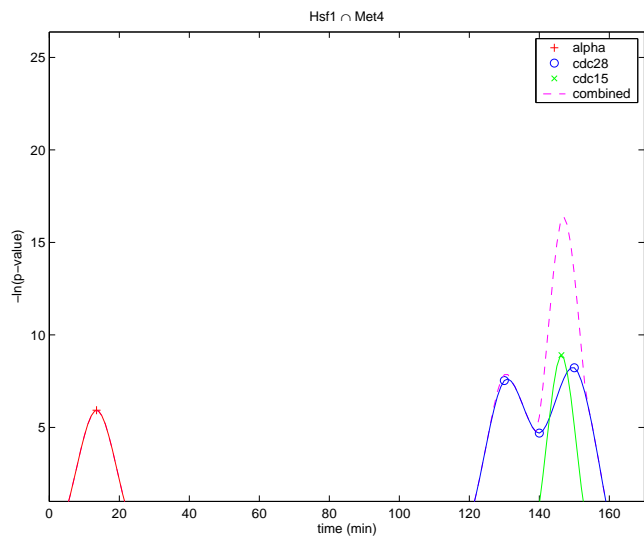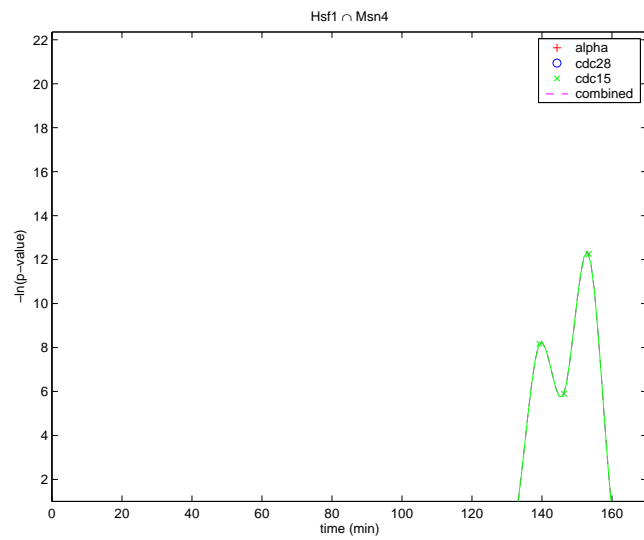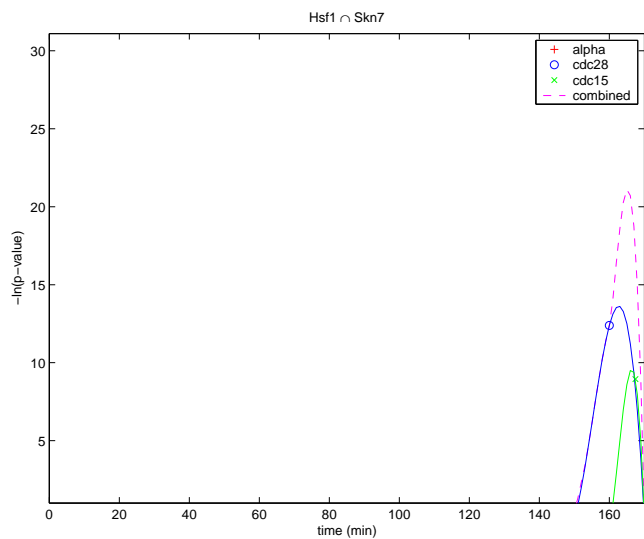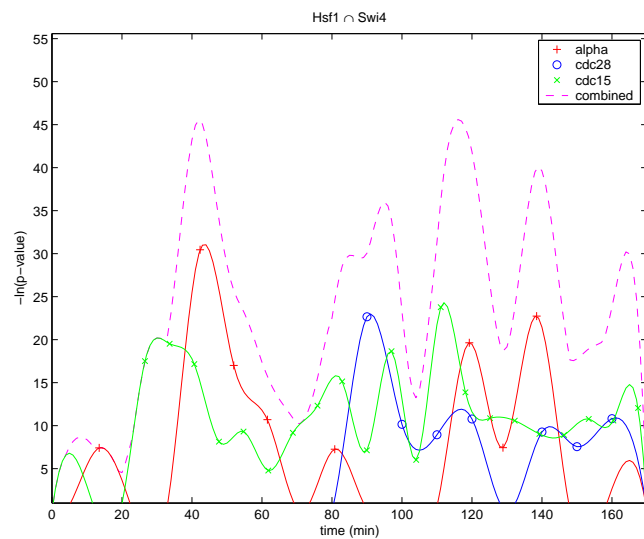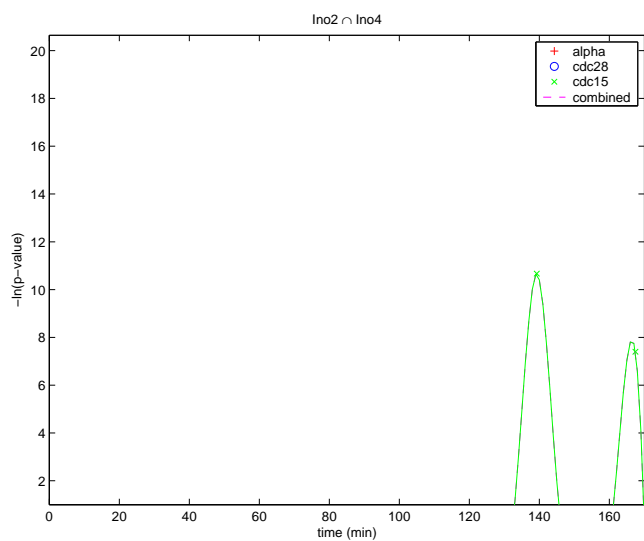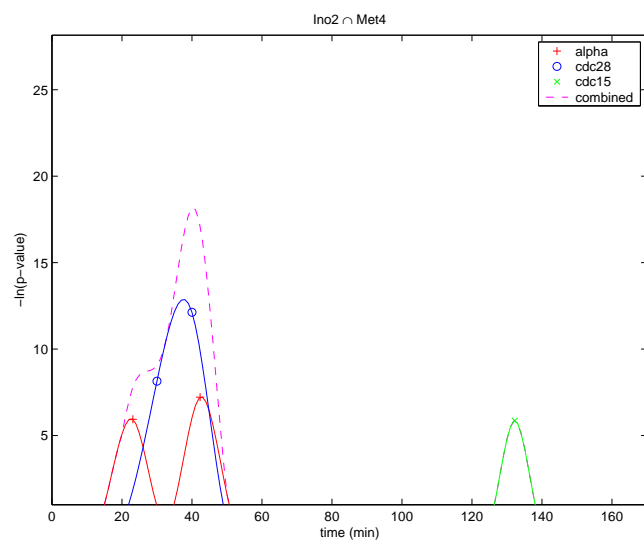

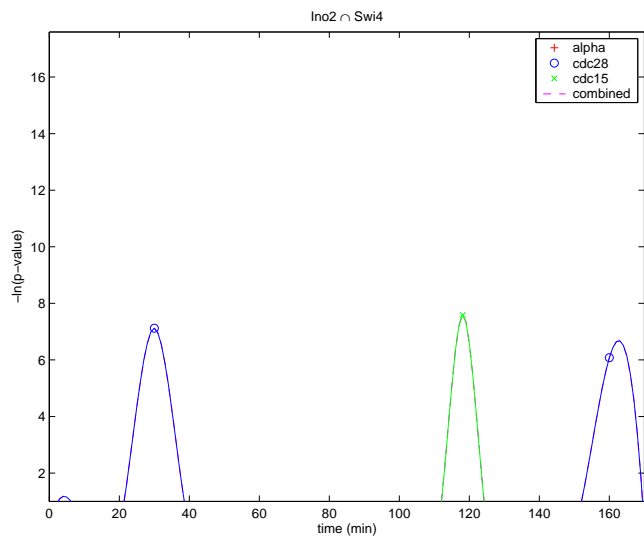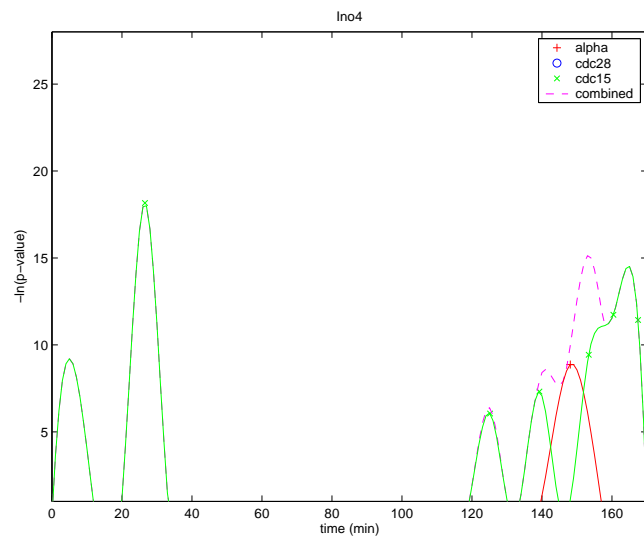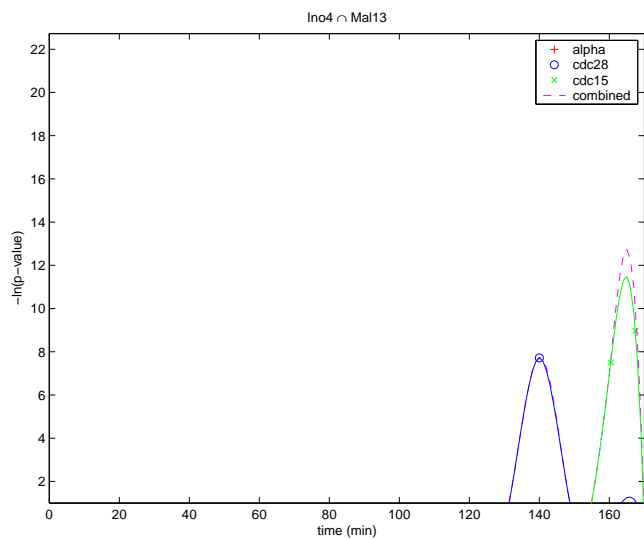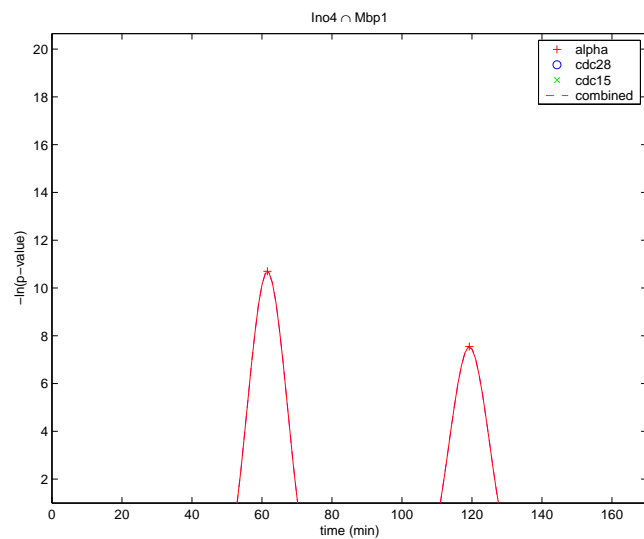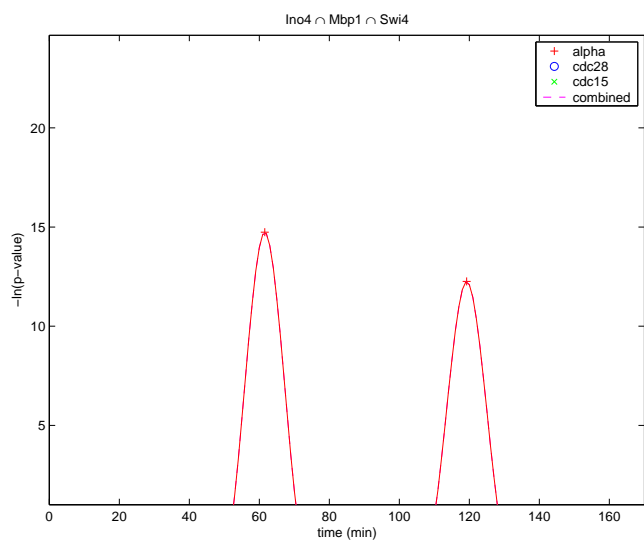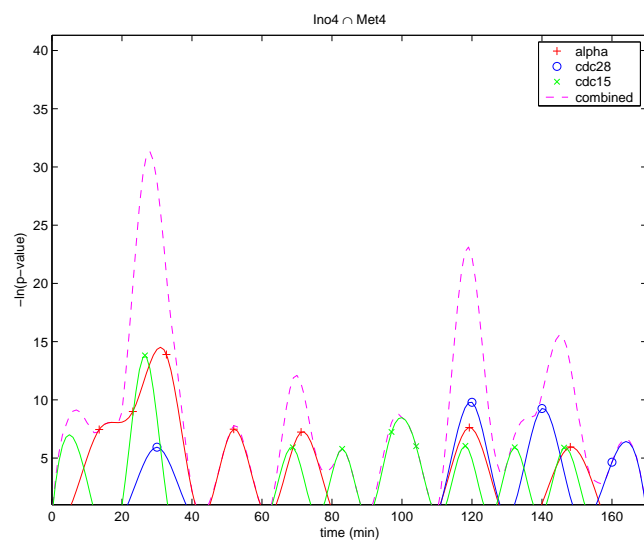

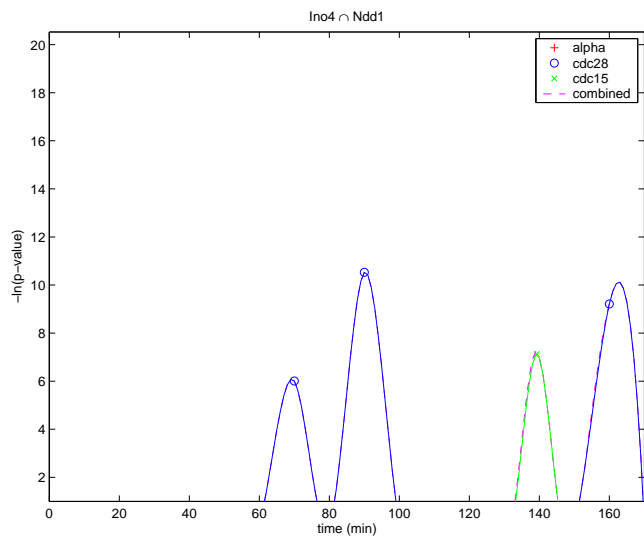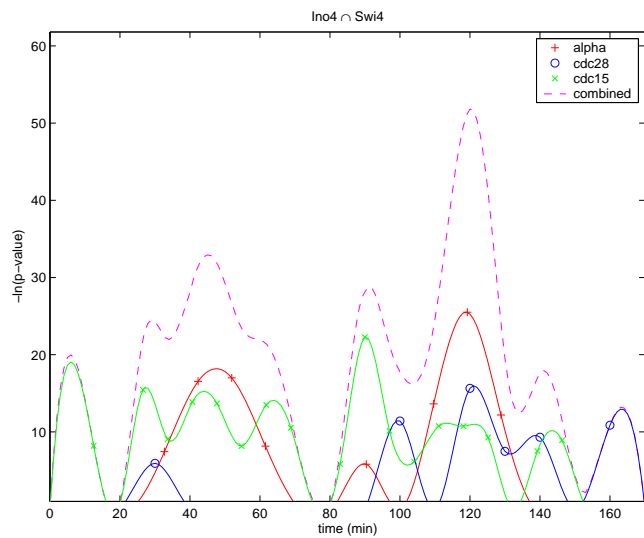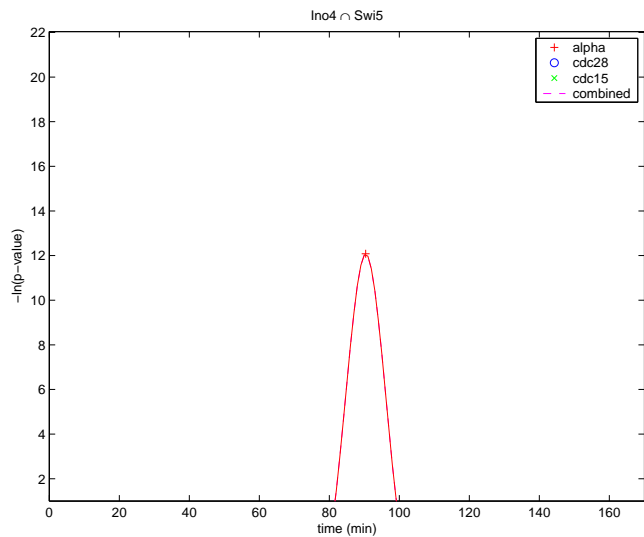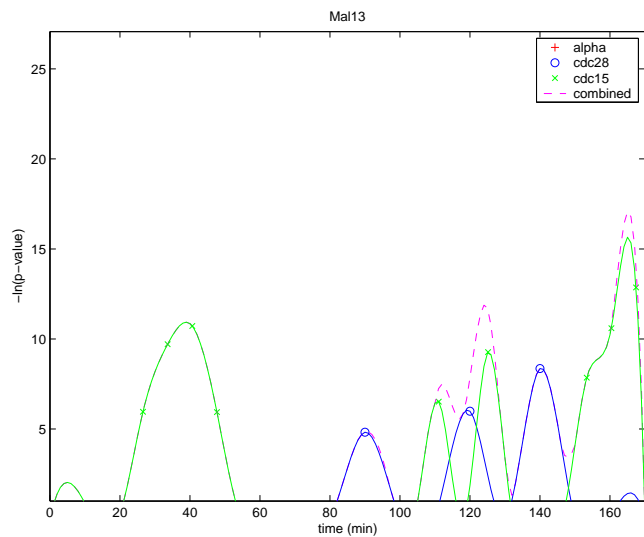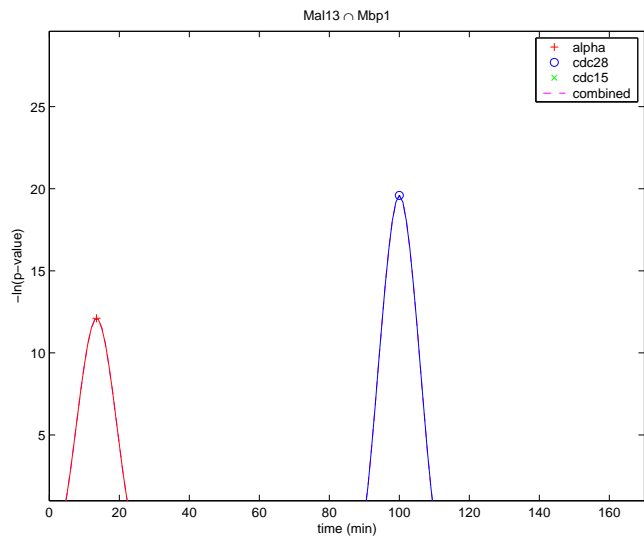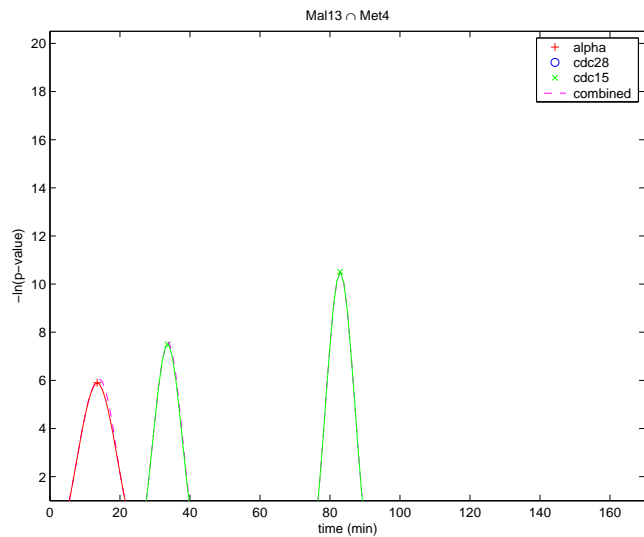



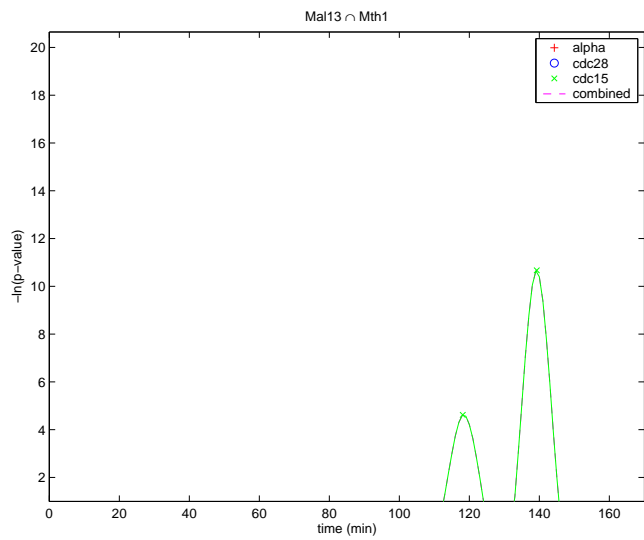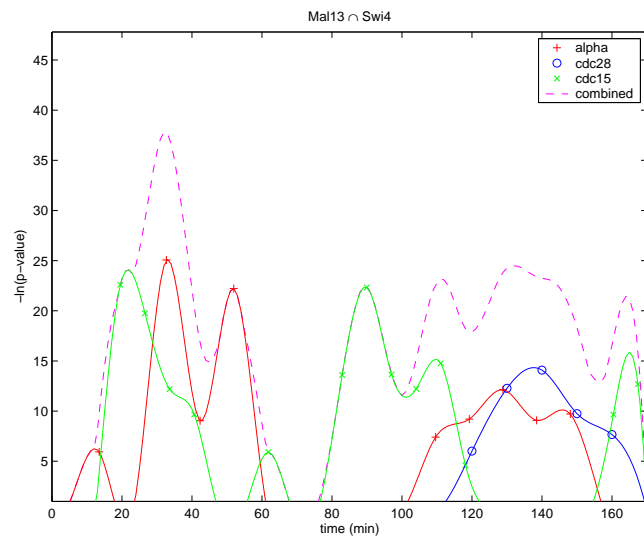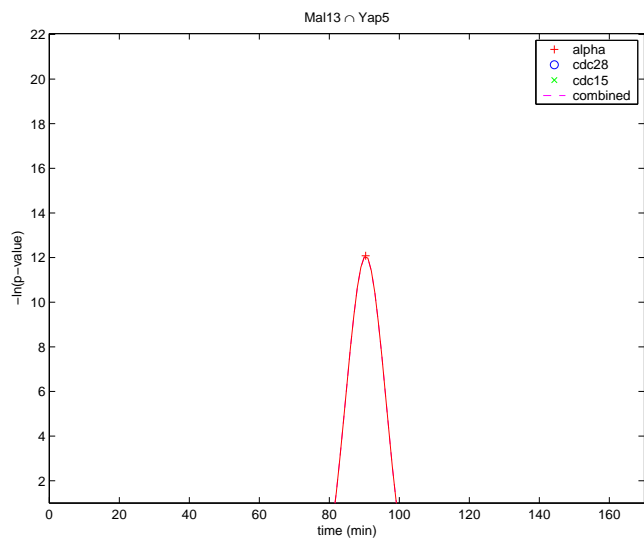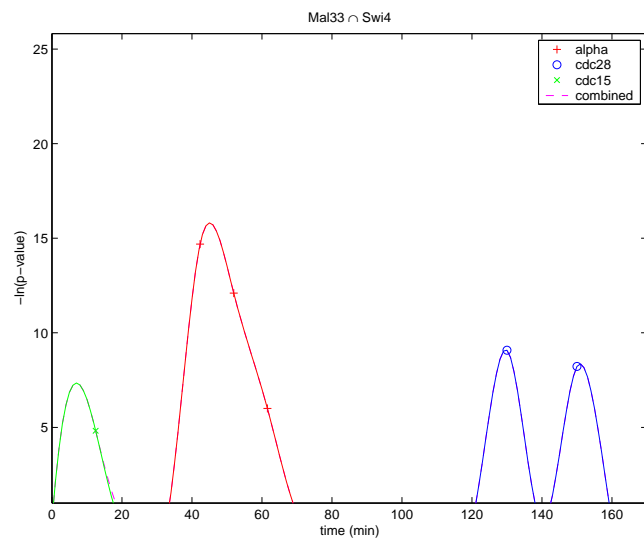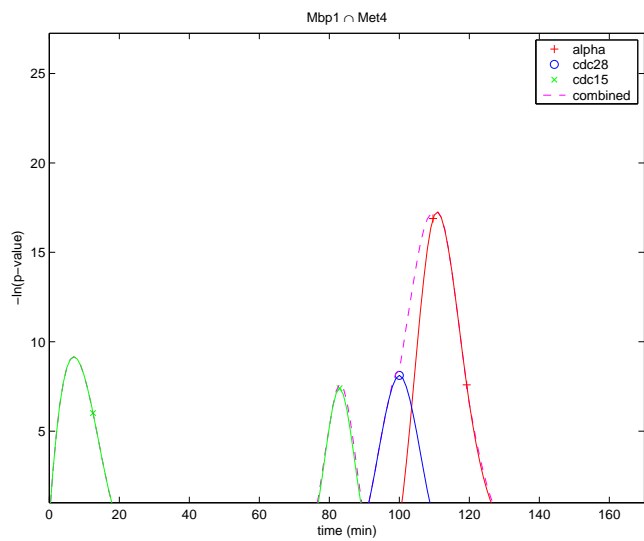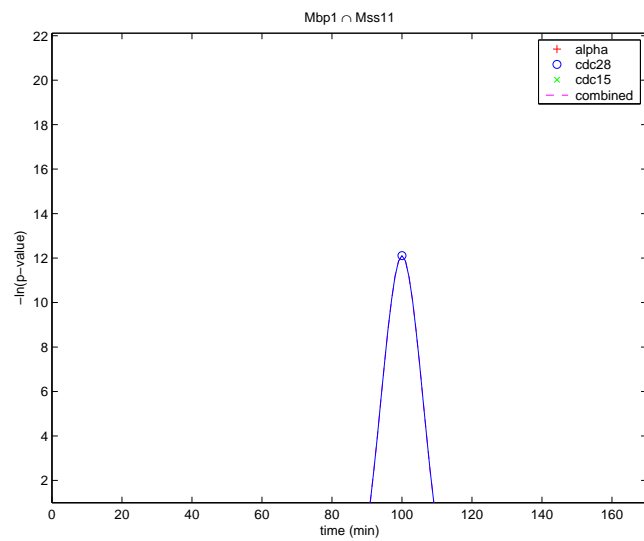

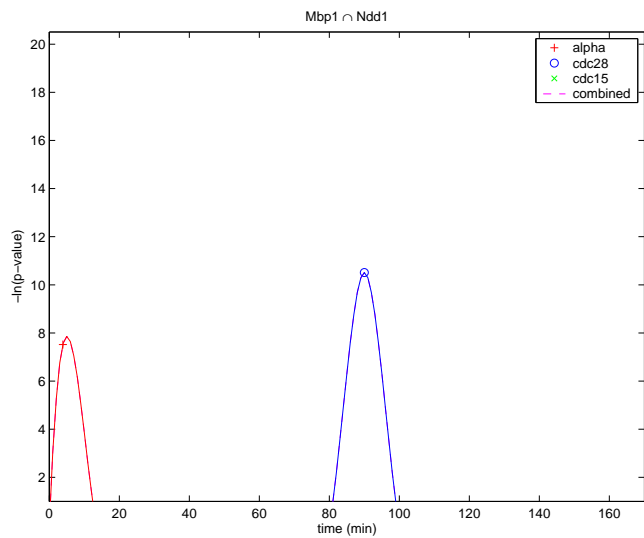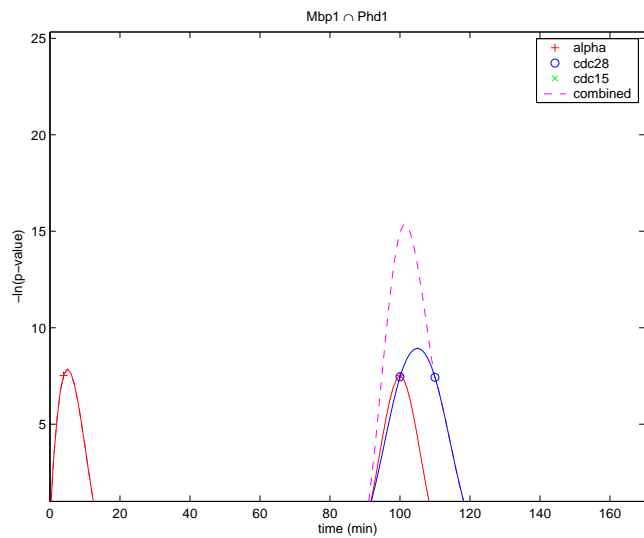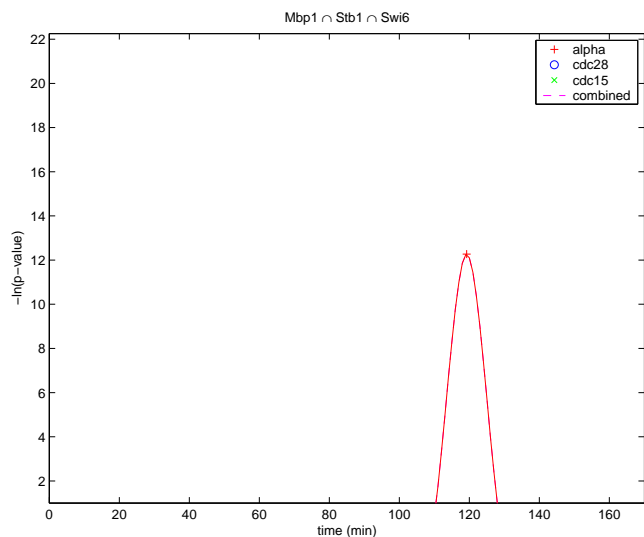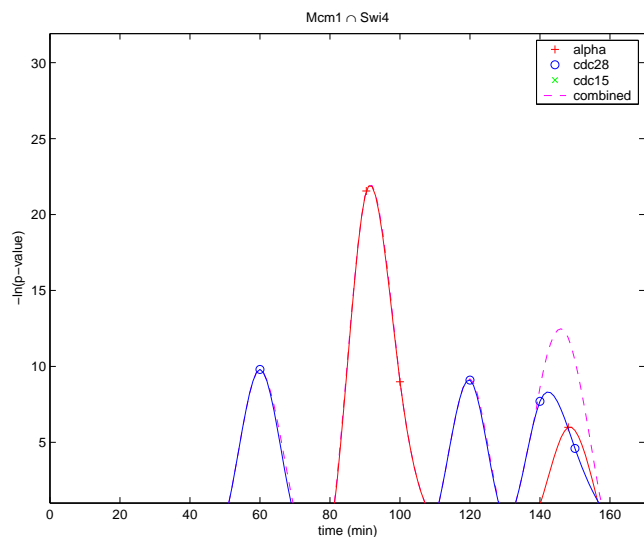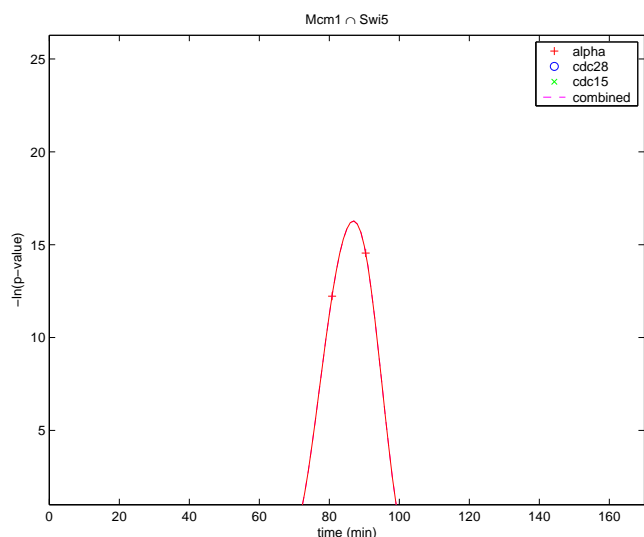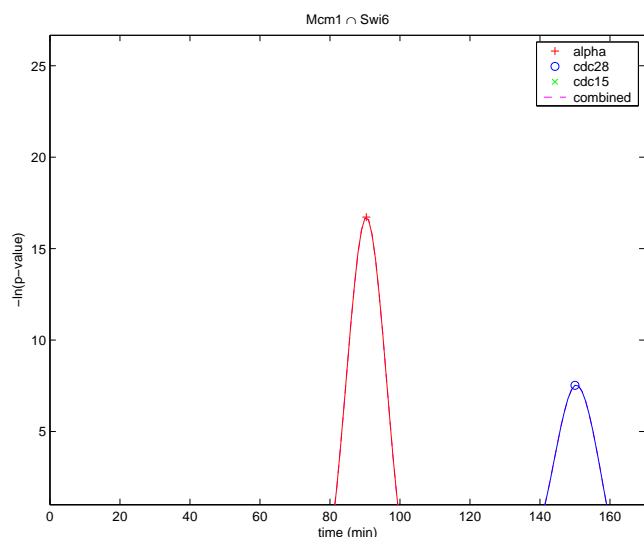

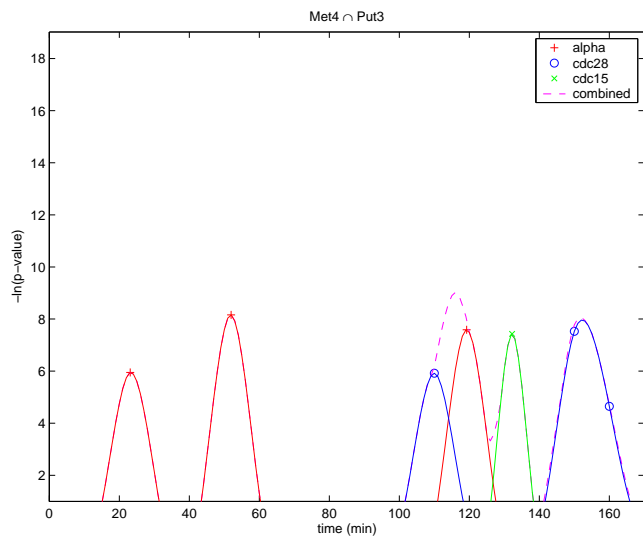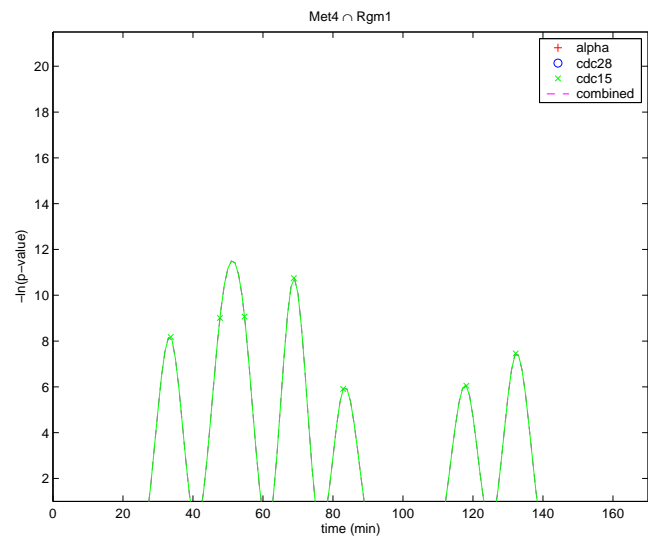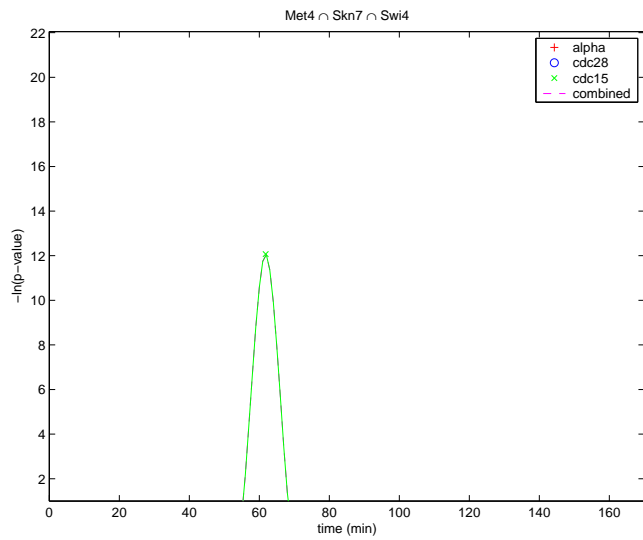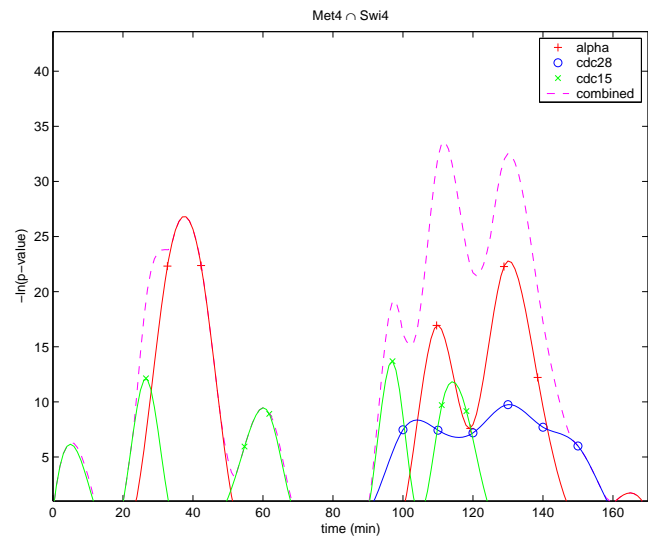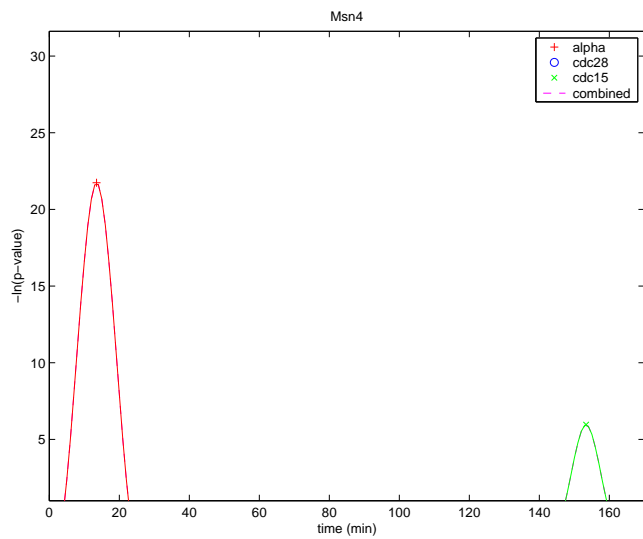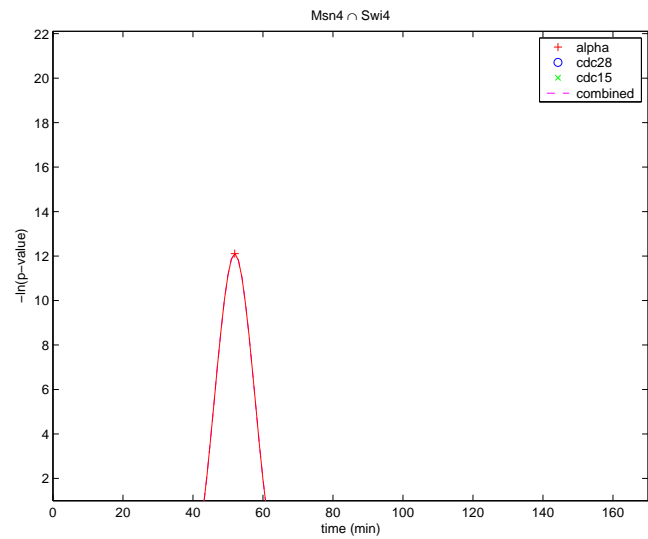

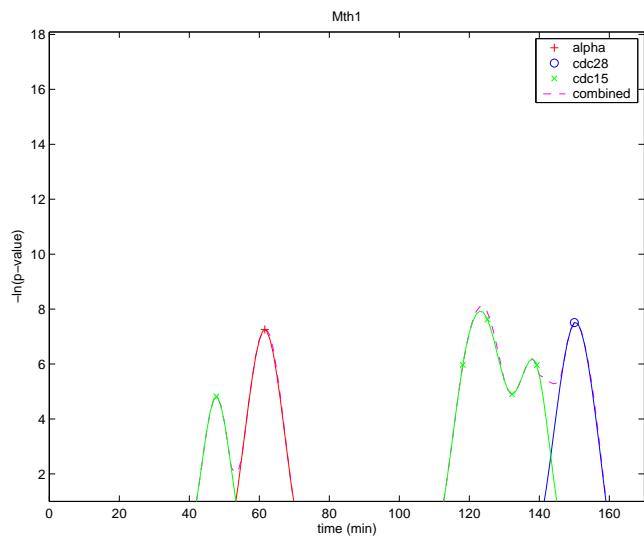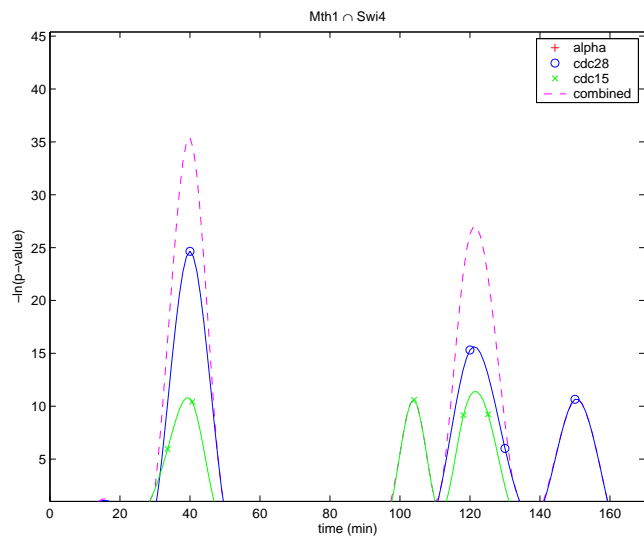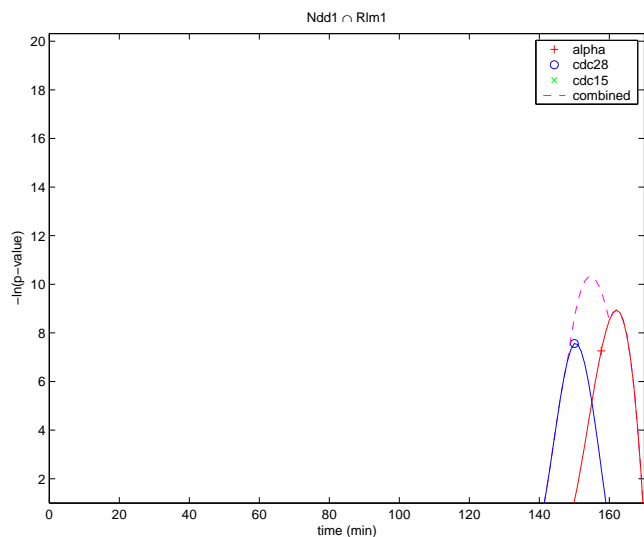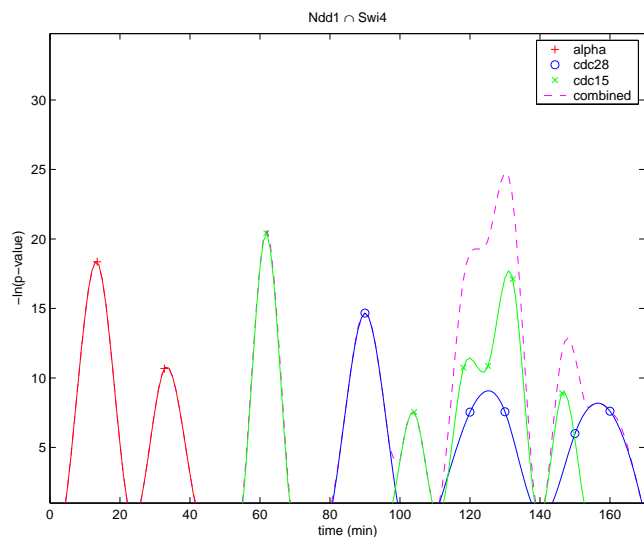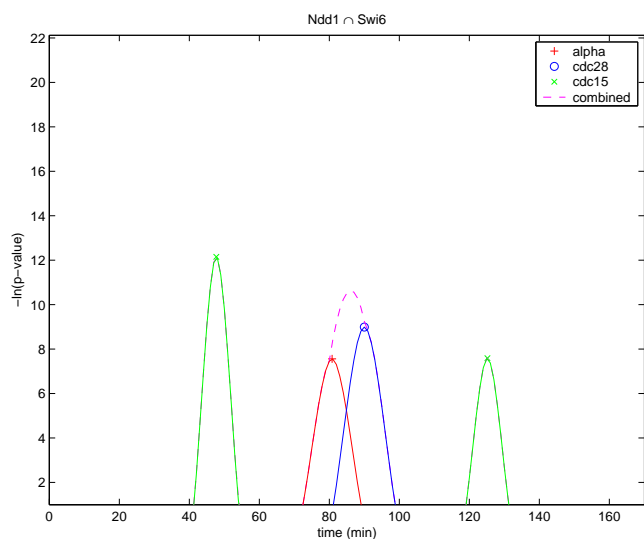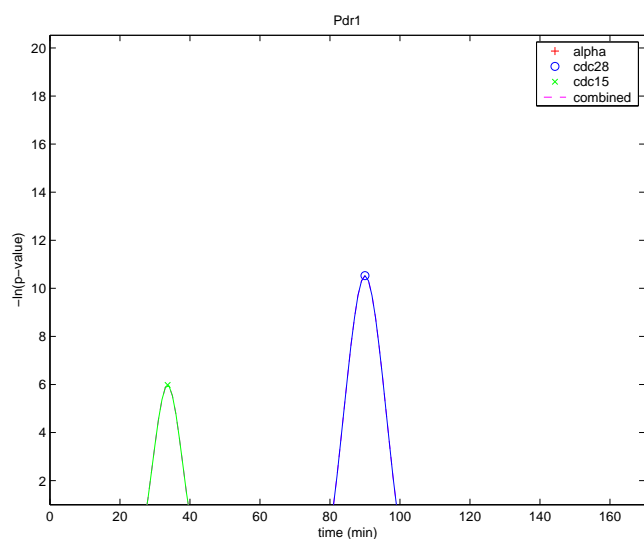

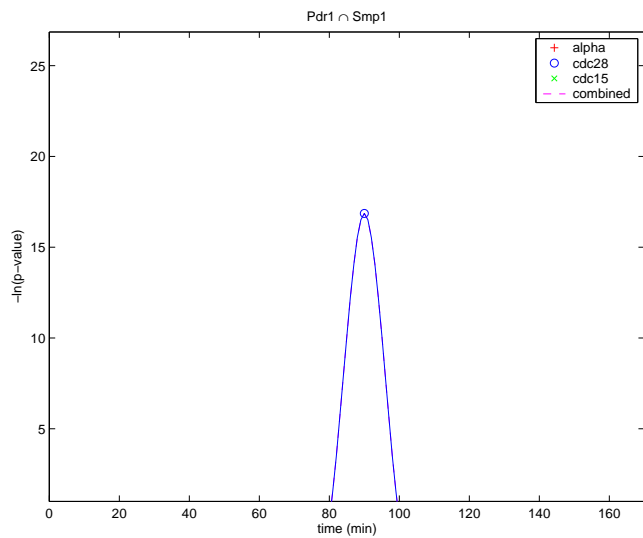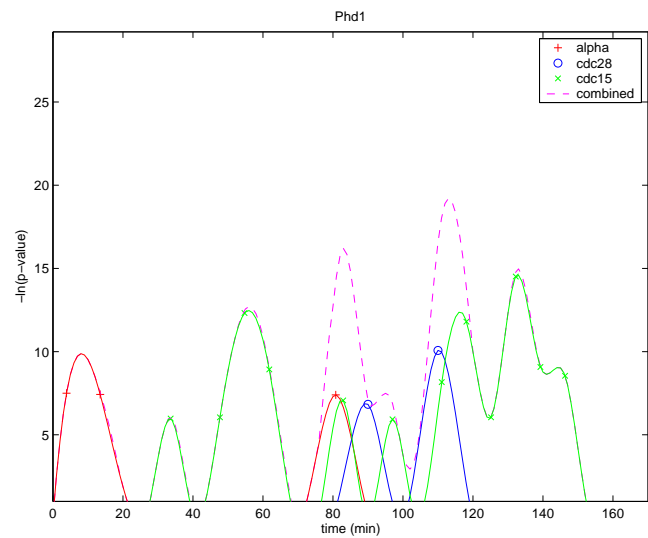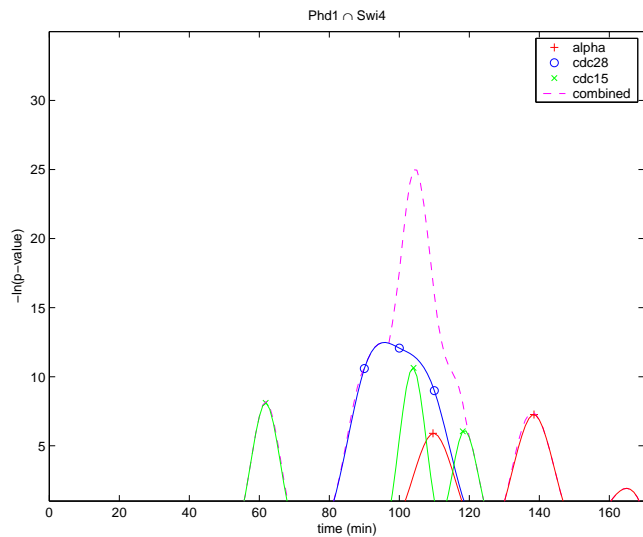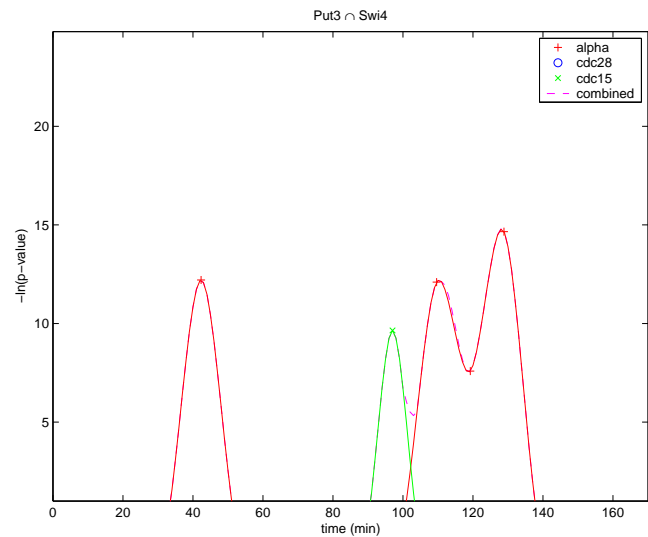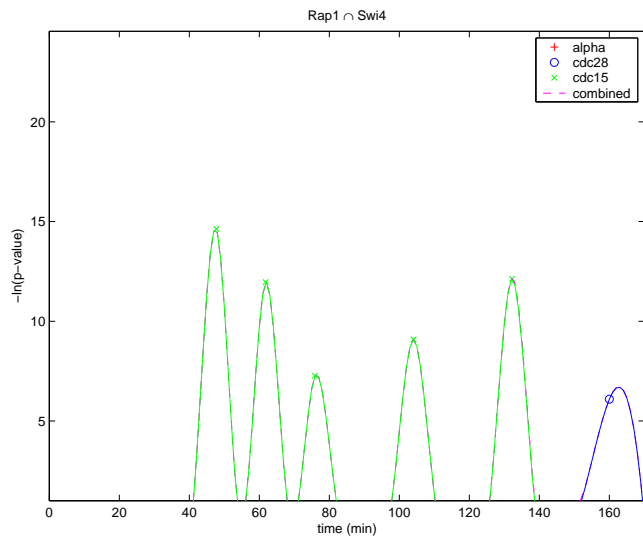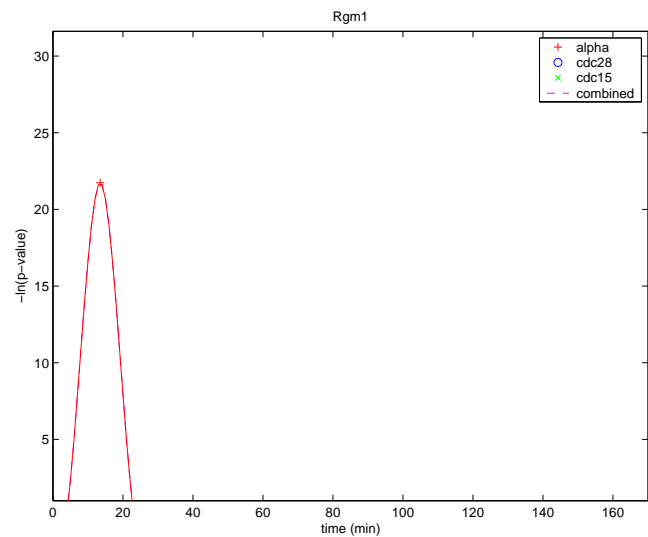

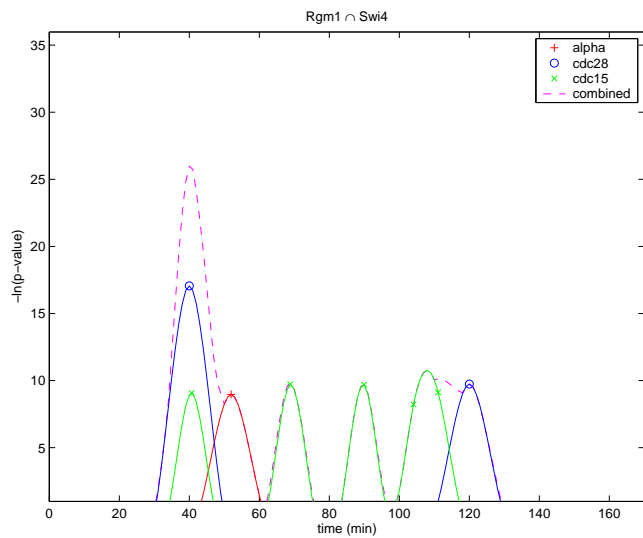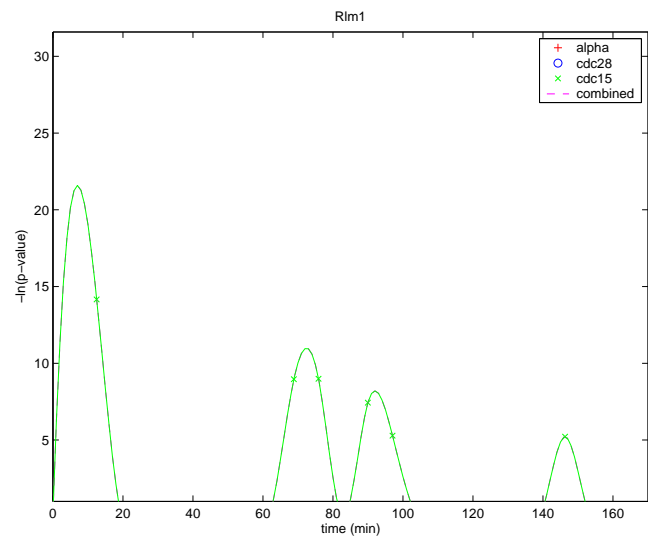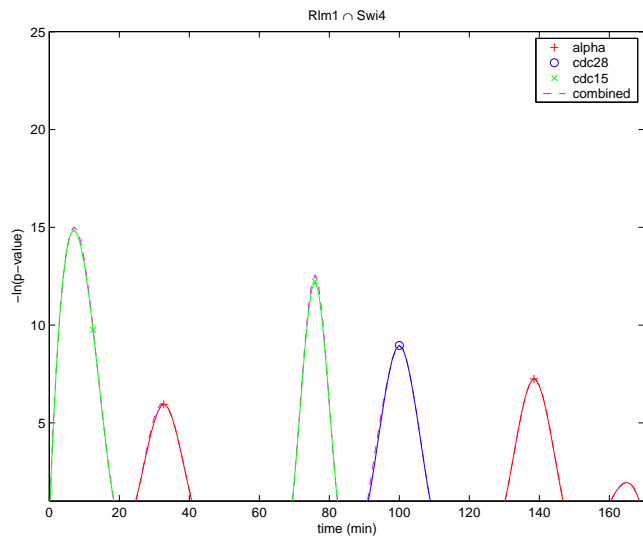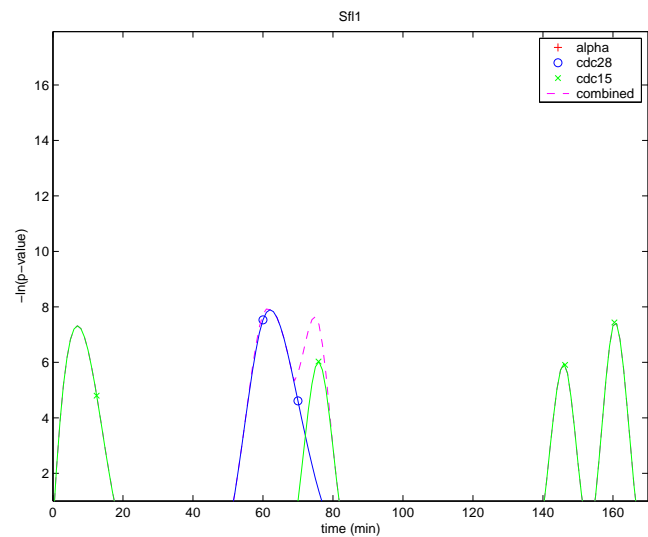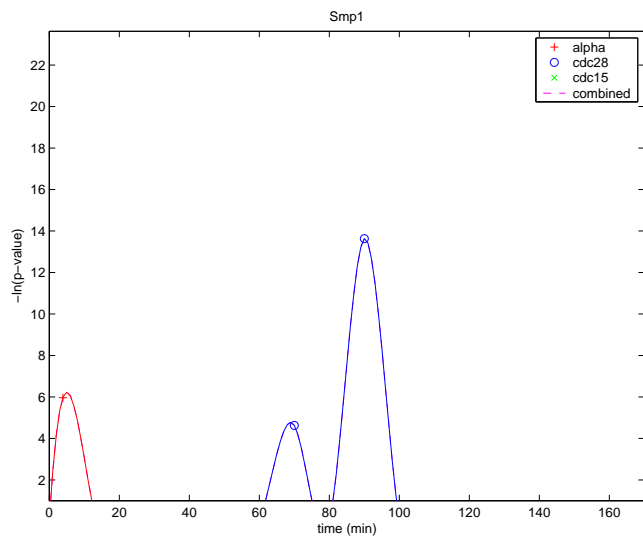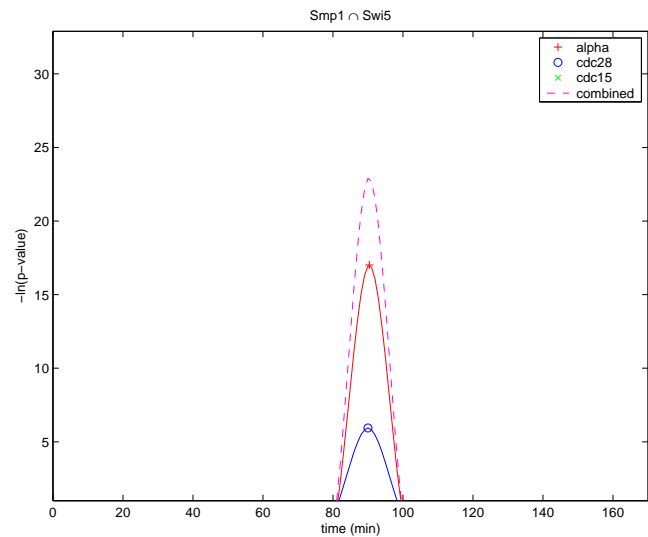

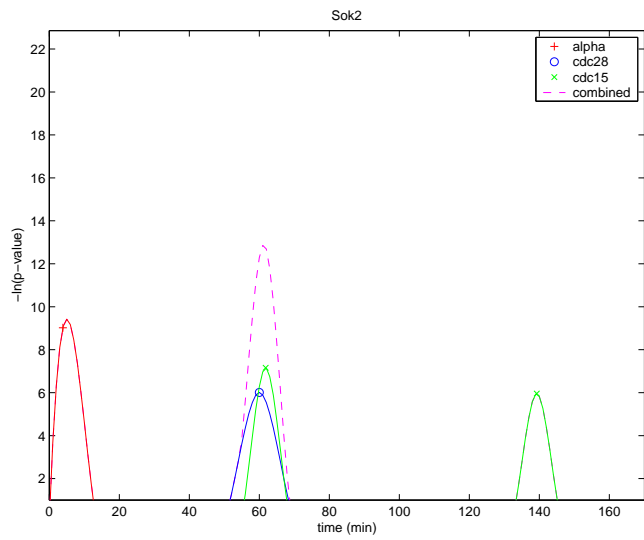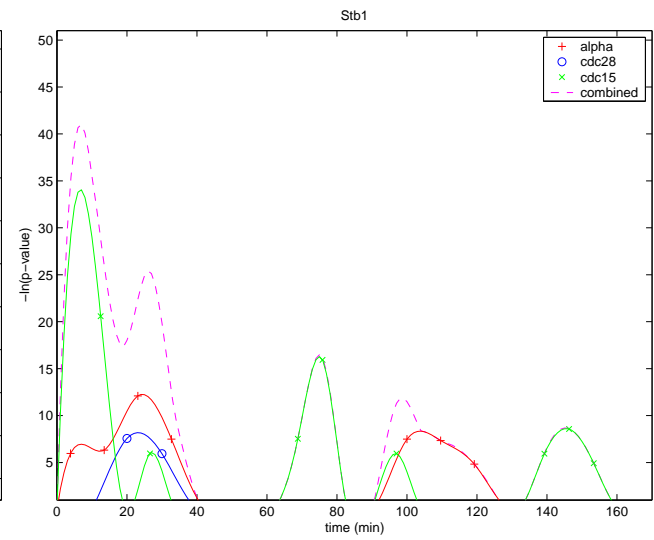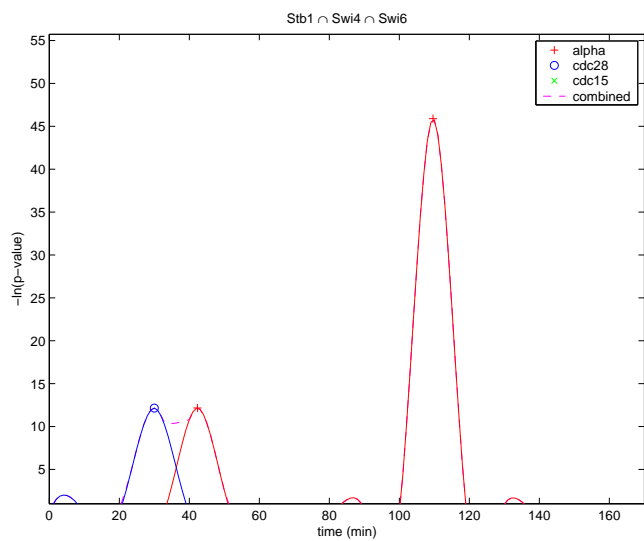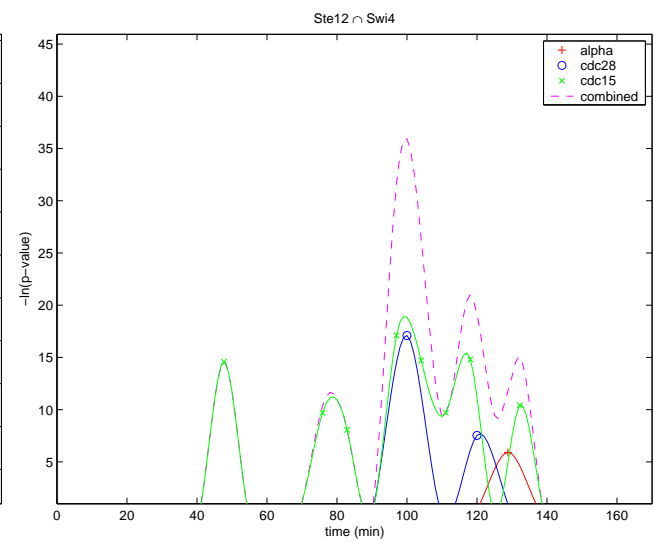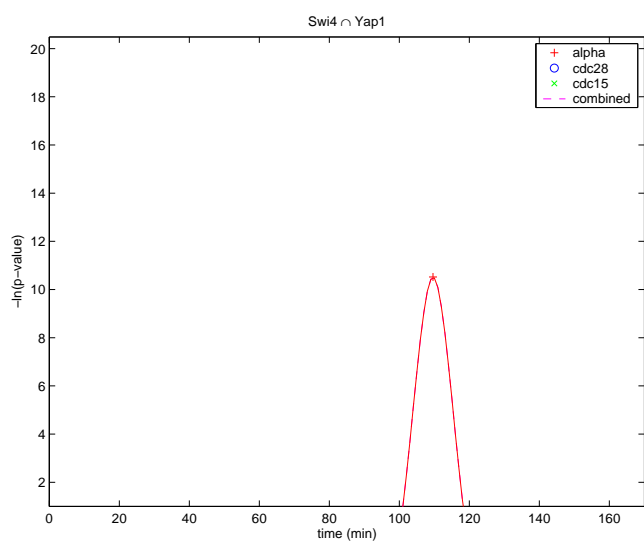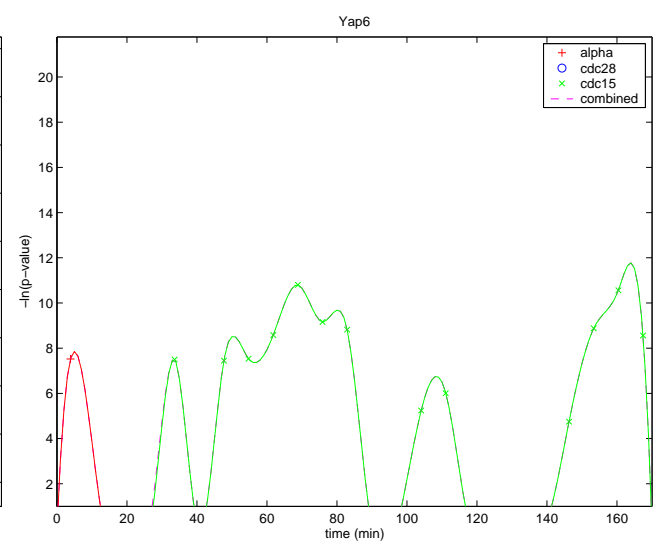

Supplement: 1471-2164-10-S1-S8-S4.pdf [file 1471-2164-10-S1-S8-S4.pdf]
