# Supplementary material for: An ensemble learning approach to reverse-engineering transcriptional regulatory networks from time-series gene expression data
Source: PubMed Central journal article supplement (PMC2709269; doi:10.1186/1471-2164-10-s1-s8), 2009-07-07
Supplement: 1471-2164-10-S1-S8-S1.pdf [file 1471-2164-10-S1-S8-S1.pdf]

**Supplementary Table 1.** Regulatory rules learned from CDC28 data set.

| 10min                                              | <i>p</i> |
|----------------------------------------------------|----------|
| $\text{Swi4} \geq 2.86 \cap \text{Swi6} \geq 3.77$ | 8.45E-13 |
| $\text{Mbp1} \geq 4.63$                            | 1.82E-12 |
| $\text{Swi6} \geq 5.71$                            | 2.04E-12 |
| $\text{Mbp1} \geq 2.96 \cap \text{Swi4} \geq 4.34$ | 2.41E-11 |
| $\text{Swi4} \geq 2.86$                            | 2.82E-10 |

| 20min                                              | <i>p</i> |
|----------------------------------------------------|----------|
| $\text{Mbp1} \geq 4.63$                            | 5.43E-32 |
| $\text{Mbp1} \geq 4.63 \cap \text{Swi6} \geq 4.27$ | 4.89E-26 |
| $\text{Swi6} \geq 2.67$                            | 6.94E-22 |
| $\text{Swi4} \geq 2.36 \cap \text{Swi6} \geq 2.96$ | 3.28E-19 |
| $\text{Mbp1} \geq 2.3 \cap \text{Swi4} \geq 3.69$  | 2.63E-18 |
| $\text{Stb1} \geq 2.43 \cap \text{Swi4} \geq 2.36$ | 3.49E-15 |
| $\text{Fkh2} \geq 2.69 \cap \text{Mbp1} \geq 2.3$  | 1.04E-8  |
| $\text{Swi4} \geq 3.73$                            | 1.15E-7  |
| $\text{Dot6} \geq 3.04 \cap \text{Mbp1} \geq 4.63$ | 5.4E-6   |
| $\text{Ash1} \geq 3.1 \cap \text{Mbp1} \geq 4.63$  | 5.4E-6   |
| $\text{Mbp1} \geq 2.3 \cap \text{Stb1} \geq 2.53$  | 2.7E-5   |
| $\text{Hsf1} \geq 3.61 \cap \text{Mbp1} \geq 2.3$  | 2.7E-5   |
| $\text{Ecm22} \geq 2.43 \cap \text{Mbp1} \geq 2.3$ | 2.75E-5  |
| $\text{Stb1} \geq 2.81$                            | 5.21E-4  |
| $\text{Mbp1} \geq 2.3 \cap \text{Sok2} \geq 2.5$   | 5.76E-4  |

| 30min                                                           | <i>p</i> |
|-----------------------------------------------------------------|----------|
| Mbp1 $\geq$ 4.63                                                | 2.19E-17 |
| Swi4 $\geq$ 2.3                                                 | 6.42E-15 |
| Mbp1 $\geq$ 4.63 $\cap$ Swi6 $\geq$ 4.71                        | 7.16E-15 |
| Swi4 $\geq$ 2.3 $\cap$ Swi6 $\geq$ 2.67                         | 2.73E-13 |
| Mbp1 $\geq$ 2.72 $\cap$ Swi4 $\geq$ 2.94                        | 2.73E-13 |
| Stb1 $\geq$ 2.43 $\cap$ Swi4 $\geq$ 3.69                        | 1.31E-12 |
| Swi6 $\geq$ 4.71                                                | 1.74E-12 |
| Fkh2 $\geq$ 2.4 $\cap$ Mbp1 $\geq$ 4.63                         | 1.76E-10 |
| Mbp1 $\geq$ 4.63 $\cap$ Stb1 $\geq$ 2.43                        | 1.91E-10 |
| Mbp1 $\geq$ 6.21 $\cap$ Swi4 $\geq$ 2.3 $\cap$ Swi6 $\geq$ 4.71 | 2.26E-10 |
| Ash1 $\geq$ 2.73 $\cap$ Swi4 $\geq$ 2.94                        | 4.06E-8  |
| Ash1 $\geq$ 3.41 $\cap$ Mbp1 $\geq$ 4.63                        | 4.56E-7  |
| Stb1 $\geq$ 2.43 $\cap$ Swi4 $\geq$ 2.3 $\cap$ Swi6 $\geq$ 4.71 | 5.29E-6  |
| Fkh2 $\geq$ 4.51 $\cap$ Swi4 $\geq$ 2.3                         | 9.26E-6  |
| Mbp1 $\geq$ 5.17 $\cap$ Yap6 $\geq$ 2.36                        | 6.25E-5  |
| Fkh2 $\geq$ 3.61                                                | 1.22E-4  |
| Met4 $\geq$ 4.14                                                | 1.73E-4  |
| Ino2 $\geq$ 2.53 $\cap$ Met4 $\geq$ 4.42                        | 2.92E-4  |
| Cbf1 $\geq$ 3.08 $\cap$ Ino4 $\geq$ 2.3                         | 5.59E-4  |
| Cbf1 $\geq$ 2.63 $\cap$ Mal33 $\geq$ 3.15                       | 5.7E-4   |
| Ino2 $\geq$ 2.44 $\cap$ Swi4 $\geq$ 2.3                         | 8.09E-4  |

| 40min                                                             | <i>p</i> |
|-------------------------------------------------------------------|----------|
| Swi4 $\geq$ 4.61                                                  | 9.94E-18 |
| Fkh2 $\geq$ 3.24                                                  | 1.02E-11 |
| Mth1 $\geq$ 2.9 $\cap$ Swi4 $\geq$ 4.61                           | 1.97E-11 |
| Swi4 $\geq$ 2.3 $\cap$ Swi6 $\geq$ 2.72                           | 3.58E-10 |
| Fkh2 $\geq$ 2.62 $\cap$ Swi6 $\geq$ 2.35                          | 2.06E-8  |
| Rgm1 $\geq$ 2.3 $\cap$ Swi4 $\geq$ 4.61                           | 3.9E-8   |
| Fkh2 $\geq$ 3.24 $\cap$ Swi4 $\geq$ 3.32                          | 2.43E-7  |
| Mbp1 $\geq$ 5.52 $\cap$ Swi4 $\geq$ 4.61                          | 4.66E-7  |
| Fkh1 $\geq$ 3.0 $\cap$ Fkh2 $\geq$ 2.62                           | 3.76E-6  |
| Ino2 $\geq$ 2.53 $\cap$ Met4 $\geq$ 4.42                          | 5.4E-6   |
| Met4 $\geq$ 4.87                                                  | 5.45E-6  |
| Fkh2 $\geq$ 2.62 $\cap$ Msn1 $\geq$ 2.32                          | 5.56E-6  |
| Ecm22 $\geq$ 2.34 $\cap$ Swi4 $\geq$ 2.3                          | 5.96E-6  |
| Hsf1 $\geq$ 2.45                                                  | 2.42E-5  |
| Cbf1 $\geq$ 2.44 $\cap$ Met4 $\geq$ 4.42                          | 6.31E-5  |
| Met31 $\geq$ 3.17 $\cap$ Met4 $\geq$ 3.47                         | 6.44E-5  |
| Cbf1 $\geq$ 3.41 $\cap$ Met31 $\geq$ 3.17 $\cap$ Met4 $\geq$ 3.04 | 6.57E-5  |
| Stb1 $\geq$ 2.81 $\cap$ Swi4 $\geq$ 2.3                           | 1.31E-4  |
| Fkh2 $\geq$ 4.27 $\cap$ Ndd1 $\geq$ 3.41                          | 2.92E-4  |
| Cbf1 $\geq$ 2.55 $\cap$ Mal33 $\geq$ 3.15                         | 5.93E-4  |

| 50min                                    | <i>p</i> |
|------------------------------------------|----------|
| Fkh2 $\geq$ 4.51                         | 1.11E-17 |
| Fkh2 $\geq$ 4.27 $\cap$ Ndd1 $\geq$ 4.34 | 5.1E-15  |
| Ndd1 $\geq$ 9.12                         | 7.43E-14 |
| Fkh2 $\geq$ 3.35 $\cap$ Swi6 $\geq$ 3.19 | 7.66E-14 |
| Fkh2 $\geq$ 3.35 $\cap$ Mcm1 $\geq$ 5.01 | 1.08E-12 |
| Swi6 $\geq$ 3.0                          | 5.65E-12 |
| Swi4 $\geq$ 3.32                         | 5.65E-12 |
| Fkh1 $\geq$ 3.73 $\cap$ Fkh2 $\geq$ 3.35 | 1.42E-11 |
| Fkh2 $\geq$ 3.35 $\cap$ Swi4 $\geq$ 2.3  | 1.08E-5  |
| Swi4 $\geq$ 3.32 $\cap$ Swi6 $\geq$ 7.45 | 6.57E-5  |
| Met4 $\geq$ 3.47                         | 1.23E-4  |
| Cbf1 $\geq$ 2.44 $\cap$ Met4 $\geq$ 3.47 | 2.95E-4  |

| 60min                                    | <i>p</i> |
|------------------------------------------|----------|
| Mcm1 $\geq$ 2.39 $\cap$ Ndd1 $\geq$ 2.47 | 7.86E-20 |
| Fkh2 $\geq$ 4.2 $\cap$ Ndd1 $\geq$ 2.47  | 1.31E-16 |
| Ndd1 $\geq$ 2.47                         | 1.17E-15 |
| Fkh2 $\geq$ 4.2 $\cap$ Mcm1 $\geq$ 4.77  | 3.93E-15 |
| Mcm1 $\geq$ 2.39                         | 8.4E-15  |
| Fkh2 $\geq$ 2.81                         | 5.79E-14 |
| Swi4 $\geq$ 3.73                         | 9.54E-10 |
| Mcm1 $\geq$ 2.44 $\cap$ Swi4 $\geq$ 4.66 | 5.55E-5  |
| Fkh1 $\geq$ 3.44 $\cap$ Ndd1 $\geq$ 2.47 | 2.67E-4  |
| Mbp1 $\geq$ 2.32 $\cap$ Swi4 $\geq$ 3.73 | 2.72E-4  |
| Fkh1 $\geq$ 3.77 $\cap$ Fkh2 $\geq$ 2.3  | 5.21E-4  |
| Sfl1 $\geq$ 2.58                         | 5.37E-4  |
| Uga3 $\geq$ 2.35                         | 6.43E-4  |

| 70min                                    | <i>p</i> |
|------------------------------------------|----------|
| Mcm1 $\geq$ 2.39 $\cap$ Ndd1 $\geq$ 2.3  | 6.22E-26 |
| Fkh2 $\geq$ 4.07                         | 3.69E-21 |
| Ndd1 $\geq$ 2.3                          | 1.22E-19 |
| Fkh2 $\geq$ 2.3 $\cap$ Ndd1 $\geq$ 2.3   | 2.9E-17  |
| Mcm1 $\geq$ 2.39                         | 9.15E-17 |
| Fkh2 $\geq$ 3.58 $\cap$ Mcm1 $\geq$ 3.44 | 2.24E-11 |
| Fkh1 $\geq$ 3.41 $\cap$ Ndd1 $\geq$ 2.3  | 1.49E-10 |
| Fkh1 $\geq$ 7.24 $\cap$ Fkh2 $\geq$ 4.07 | 5.55E-5  |
| Nrg1 $\geq$ 2.4 $\cap$ Smp1 $\geq$ 3.12  | 2.33E-3  |

| 80min                                | $p$      |
|--------------------------------------|----------|
| $Mcm1 \geq 2.39 \cap Ndd1 \geq 2.49$ | 2.26E-21 |
| $Ndd1 \geq 6.92$                     | 7.59E-18 |
| $Mcm1 \geq 2.39$                     | 4.36E-16 |
| $Fkh2 \geq 4.2 \cap Mcm1 \geq 4.77$  | 2.38E-15 |
| $Fkh2 \geq 3.24$                     | 3.93E-15 |
| $Fkh2 \geq 2.6 \cap Ndd1 \geq 2.3$   | 3.93E-15 |
| $Fkh1 \geq 2.66 \cap Ndd1 \geq 2.47$ | 9.96E-11 |
| $Fkh2 \geq 4.2 \cap Gat1 \geq 2.63$  | 7.03E-4  |
| $Fkh2 \geq 3.24 \cap Hsf1 \geq 4.76$ | 7.1E-4   |
| $Cbf1 \geq 2.58 \cap Ndd1 \geq 2.3$  | 7.1E-4   |
| $Dal82 \geq 2.54 \cap Ndd1 \geq 2.3$ | 7.25E-4  |

| 90min                                                          | <i>p</i> |
|----------------------------------------------------------------|----------|
| Swi4 $\geq$ 2.8                                                | 6.24E-12 |
| Ndd1 $\geq$ 2.3                                                | 1.04E-11 |
| Fkh2 $\geq$ 3.24 $\cap$ Ndd1 $\geq$ 2.3                        | 1.01E-10 |
| Hsf1 $\geq$ 2.4 $\cap$ Swi4 $\geq$ 2.8                         | 1.44E-10 |
| Fkh2 $\geq$ 3.24                                               | 8.21E-10 |
| Fkh2 $\geq$ 3.96 $\cap$ Ino4 $\geq$ 2.3                        | 3.67E-8  |
| Pdr1 $\geq$ 2.33 $\cap$ Smp1 $\geq$ 2.83                       | 4.76E-8  |
| Fhl1 $\geq$ 8.8                                                | 4.76E-8  |
| Cup9 $\geq$ 2.81                                               | 2.27E-7  |
| Mcm1 $\geq$ 2.3 $\cap$ Ndd1 $\geq$ 2.49                        | 2.36E-7  |
| Fkh1 $\geq$ 2.66 $\cap$ Ndd1 $\geq$ 2.49                       | 2.36E-7  |
| Ash1 $\geq$ 2.36 $\cap$ Swi4 $\geq$ 2.8                        | 2.36E-7  |
| Ndd1 $\geq$ 4.07 $\cap$ Swi4 $\geq$ 2.8                        | 4.26E-7  |
| Fhl1 $\geq$ 8.8 $\cap$ Smp1 $\geq$ 3.02                        | 4.26E-7  |
| Fkh2 $\geq$ 3.96 $\cap$ Rap1 $\geq$ 2.47                       | 4.38E-7  |
| Fhl1 $\geq$ 8.8 $\cap$ Hap2 $\geq$ 2.3                         | 4.43E-7  |
| Ash1 $\geq$ 2.44 $\cap$ Ndd1 $\geq$ 2.81                       | 1.12E-6  |
| Swi5 $\geq$ 5.28                                               | 1.17E-6  |
| Smp1 $\geq$ 4.2                                                | 1.2E-6   |
| Fkh2 $\geq$ 3.96 $\cap$ Mcm1 $\geq$ 2.38                       | 3.65E-6  |
| Fhl1 $\geq$ 8.8 $\cap$ Hap2 $\geq$ 2.3                         | 5.08E-6  |
| Fkh2 $\geq$ 5.17 $\cap$ Swi4 $\geq$ 2.8                        | 5.34E-6  |
| Cup9 $\geq$ 2.81 $\cap$ Fhl1 $\geq$ 8.8                        | 5.34E-6  |
| Fkh2 $\geq$ 3.96 $\cap$ Met4 $\geq$ 3.38                       | 5.4E-6   |
| Grf10(pho2) $\geq$ 2.32 $\cap$ Ndd1 $\geq$ 2.3                 | 2.47E-5  |
| Phd1 $\geq$ 2.6 $\cap$ Swi4 $\geq$ 2.8                         | 2.52E-5  |
| Mbp1 $\geq$ 5.36 $\cap$ Swi4 $\geq$ 2.8                        | 2.52E-5  |
| Cin5 $\geq$ 2.3 $\cap$ Ndd1 $\geq$ 2.3                         | 2.59E-5  |
| Pdr1 $\geq$ 4.07                                               | 2.67E-5  |
| Ino4 $\geq$ 2.3 $\cap$ Ndd1 $\geq$ 2.3                         | 2.67E-5  |
| Mbp1 $\geq$ 3.41 $\cap$ Ndd1 $\geq$ 2.3                        | 2.73E-5  |
| Fkh1 $\geq$ 3.41 $\cap$ Mcm1 $\geq$ 3.12                       | 6.19E-5  |
| Fhl1 $\geq$ 9.25 $\cap$ Ndd1 $\geq$ 2.3                        | 6.19E-5  |
| Ndd1 $\geq$ 4.07 $\cap$ Put3 $\geq$ 2.45                       | 6.25E-5  |
| Hsf1 $\geq$ 4.2 $\cap$ Ndd1 $\geq$ 2.3                         | 6.25E-5  |
| Hsf1 $\geq$ 2.9 $\cap$ Phd1 $\geq$ 2.76 $\cap$ Swi4 $\geq$ 2.8 | 9.71E-5  |
| Swi4 $\geq$ 2.8 $\cap$ Swi6 $\geq$ 5.71                        | 1.16E-4  |
| Ndd1 $\geq$ 2.3 $\cap$ Swi5 $\geq$ 2.47                        | 1.22E-4  |
| Mbp1 $\geq$ 5.36                                               | 1.22E-4  |
| Rap1 $\geq$ 2.51 $\cap$ Smp1 $\geq$ 3.02                       | 1.25E-4  |
| Ndd1 $\geq$ 2.3 $\cap$ Swi6 $\geq$ 3.58                        | 1.25E-4  |
| Mcm1 $\geq$ 4.34                                               | 1.7E-4   |
| Cup9 $\geq$ 2.81 $\cap$ Ndd1 $\geq$ 2.3                        | 1.7E-4   |
| Hsf1 $\geq$ 2.9 $\cap$ Phd1 $\geq$ 2.6                         | 5.7E-4   |
| Hap2 $\geq$ 2.67 $\cap$ Pdr1 $\geq$ 2.33                       | 5.7E-4   |
| Hap2 $\geq$ 2.3 $\cap$ Smp1 $\geq$ 2.83                        | 5.76E-4  |
| Fhl1 $\geq$ 8.8 $\cap$ Pdr1 $\geq$ 2.45                        | 5.76E-4  |
| Rap1 $\geq$ 5.26                                               | 6.05E-4  |
| Hir2 $\geq$ 2.48                                               | 7.93E-4  |

| 100min                                    | <i>p</i> |
|-------------------------------------------|----------|
| Mbp1 $\geq$ 5.17                          | 1.81E-20 |
| Swi4 $\geq$ 2.47                          | 5.98E-19 |
| Swi6 $\geq$ 3.91                          | 1.32E-15 |
| Swi4 $\geq$ 2.47 $\cap$ Swi6 $\geq$ 3.91  | 1.46E-14 |
| Mbp1 $\geq$ 2.36 $\cap$ Swi4 $\geq$ 2.92  | 2.54E-12 |
| Mbp1 $\geq$ 2.3 $\cap$ Swi6 $\geq$ 5.71   | 1.37E-11 |
| Mal13 $\geq$ 2.83 $\cap$ Mbp1 $\geq$ 5.17 | 3.11E-9  |
| Stb1 $\geq$ 2.44 $\cap$ Swi4 $\geq$ 2.3   | 9.52E-9  |
| Ste12 $\geq$ 2.65 $\cap$ Swi4 $\geq$ 2.92 | 3.75E-8  |
| Fkh2 $\geq$ 2.4 $\cap$ Swi4 $\geq$ 2.92   | 4.96E-8  |
| Hir2 $\geq$ 2.3 $\cap$ Swi4 $\geq$ 2.92   | 5.45E-6  |
| Mbp1 $\geq$ 4.83 $\cap$ Mss11 $\geq$ 3.02 | 5.5E-6   |
| Swi5 $\geq$ 5.65                          | 5.56E-6  |
| Phd1 $\geq$ 4.02 $\cap$ Swi4 $\geq$ 2.92  | 5.73E-6  |
| Ace2 $\geq$ 2.55 $\cap$ Swi4 $\geq$ 2.3   | 9.45E-6  |
| Ace2 $\geq$ 2.55 $\cap$ Swi5 $\geq$ 5.65  | 1.09E-5  |
| Ino4 $\geq$ 2.72 $\cap$ Swi4 $\geq$ 2.3   | 1.11E-5  |
| Fkh1 $\geq$ 2.56 $\cap$ Swi4 $\geq$ 2.92  | 2.57E-5  |
| Mbp1 $\geq$ 4.83 $\cap$ Stb1 $\geq$ 2.59  | 3.07E-5  |
| Hsf1 $\geq$ 2.9 $\cap$ Swi4 $\geq$ 2.92   | 3.87E-5  |
| Rlm1 $\geq$ 2.43 $\cap$ Swi4 $\geq$ 2.3   | 1.28E-4  |
| Met4 $\geq$ 3.77                          | 1.75E-4  |
| Mbp1 $\geq$ 4.83 $\cap$ Met4 $\geq$ 2.44  | 2.98E-4  |
| Met4 $\geq$ 3.77 $\cap$ Swi4 $\geq$ 2.3   | 5.7E-4   |
| Hir2 $\geq$ 2.3 $\cap$ Phd1 $\geq$ 2.76   | 5.7E-4   |
| Mbp1 $\geq$ 2.36 $\cap$ Phd1 $\geq$ 3.51  | 5.81E-4  |
| Gat1 $\geq$ 2.66 $\cap$ Swi4 $\geq$ 2.3   | 5.93E-4  |

| 110min                                                          | <i>p</i> |
|-----------------------------------------------------------------|----------|
| Mbp1 $\geq$ 5.17                                                | 1.22E-23 |
| Swi4 $\geq$ 2.3                                                 | 1.93E-18 |
| Swi6 $\geq$ 2.35                                                | 9.55E-18 |
| Mbp1 $\geq$ 2.36 $\cap$ Swi4 $\geq$ 2.34                        | 5.61E-17 |
| Swi4 $\geq$ 2.3 $\cap$ Swi6 $\geq$ 2.35                         | 3.96E-14 |
| Mbp1 $\geq$ 2.96 $\cap$ Swi6 $\geq$ 2.56                        | 2.67E-12 |
| Ash1 $\geq$ 2.54 $\cap$ Mbp1 $\geq$ 5.17                        | 2.65E-10 |
| Stb1 $\geq$ 2.43 $\cap$ Swi4 $\geq$ 2.3                         | 1.79E-9  |
| Mbp1 $\geq$ 2.36 $\cap$ Stb1 $\geq$ 2.43                        | 4.91E-8  |
| Dot6 $\geq$ 2.43 $\cap$ Mbp1 $\geq$ 5.17                        | 5.62E-6  |
| Phd1 $\geq$ 4.02                                                | 4.23E-5  |
| Gcn4 $\geq$ 2.54 $\cap$ Phd1 $\geq$ 4.2                         | 6.31E-5  |
| Phd1 $\geq$ 4.02 $\cap$ Swi4 $\geq$ 2.3                         | 1.25E-4  |
| Hsf1 $\geq$ 2.9 $\cap$ Swi4 $\geq$ 2.59                         | 1.31E-4  |
| Mbp1 $\geq$ 2.36 $\cap$ Phd1 $\geq$ 4.02 $\cap$ Swi4 $\geq$ 2.3 | 3.04E-4  |
| Mbp1 $\geq$ 2.56 $\cap$ Mth1 $\geq$ 2.7                         | 5.81E-4  |
| Met4 $\geq$ 4.42                                                | 5.93E-4  |
| Met4 $\geq$ 3.08 $\cap$ Swi4 $\geq$ 2.3                         | 5.93E-4  |
| Mbp1 $\geq$ 2.3 $\cap$ Phd1 $\geq$ 4.2                          | 5.93E-4  |
| Ash1 $\geq$ 2.36 $\cap$ Swi4 $\geq$ 2.92                        | 6.05E-4  |

| 120min                                   | <i>p</i> |
|------------------------------------------|----------|
| Swi4 $\geq$ 4.66                         | 1.01E-15 |
| Swi6 $\geq$ 3.0                          | 4.4E-12  |
| Mbp1 $\geq$ 4.14                         | 2.94E-11 |
| Swi4 $\geq$ 2.3 $\cap$ Swi6 $\geq$ 2.35  | 5.3E-11  |
| Mbp1 $\geq$ 3.12 $\cap$ Swi4 $\geq$ 2.3  | 9.54E-10 |
| Fkh2 $\geq$ 4.07                         | 9.54E-10 |
| Stb1 $\geq$ 2.43 $\cap$ Swi4 $\geq$ 4.42 | 2.39E-9  |
| Fkh2 $\geq$ 3.51 $\cap$ Swi4 $\geq$ 2.3  | 3.16E-8  |
| Ino4 $\geq$ 2.3 $\cap$ Swi4 $\geq$ 4.66  | 1.61E-7  |
| Mth1 $\geq$ 2.92 $\cap$ Swi4 $\geq$ 4.42 | 2.22E-7  |
| Ash1 $\geq$ 3.3 $\cap$ Swi4 $\geq$ 2.3   | 4.55E-6  |
| Hsf1 $\geq$ 3.19 $\cap$ Swi4 $\geq$ 2.3  | 2.1E-5   |
| Met4 $\geq$ 4.42                         | 2.19E-5  |
| Gcn4 $\geq$ 2.38                         | 3.5E-5   |
| Ino4 $\geq$ 2.43 $\cap$ Met4 $\geq$ 4.42 | 5.6E-5   |
| Rgm1 $\geq$ 2.38 $\cap$ Swi4 $\geq$ 4.42 | 5.89E-5  |
| Mcm1 $\geq$ 2.76 $\cap$ Swi4 $\geq$ 2.3  | 1.12E-4  |
| Ndd1 $\geq$ 4.07                         | 5.21E-4  |
| Fkh2 $\geq$ 2.85 $\cap$ Hsf1 $\geq$ 3.19 | 5.21E-4  |
| Ste12 $\geq$ 2.38 $\cap$ Swi4 $\geq$ 2.3 | 5.31E-4  |
| Ndd1 $\geq$ 4.07 $\cap$ Swi4 $\geq$ 2.3  | 5.31E-4  |
| Met4 $\geq$ 4.42 $\cap$ Swi4 $\geq$ 2.3  | 7.62E-4  |

| 130min                                    | <i>p</i> |
|-------------------------------------------|----------|
| Fkh2 $\geq$ 3.51                          | 1.49E-16 |
| Swi4 $\geq$ 9.45                          | 4.02E-16 |
| Fkh2 $\geq$ 3.51 $\cap$ Mcm1 $\geq$ 3.82  | 1.42E-11 |
| Mbp1 $\geq$ 2.32 $\cap$ Swi4 $\geq$ 2.3   | 2.33E-10 |
| Swi4 $\geq$ 4.61 $\cap$ Swi6 $\geq$ 2.35  | 2.47E-10 |
| Fkh2 $\geq$ 3.51 $\cap$ Swi6 $\geq$ 2.33  | 3.54E-9  |
| Fkh2 $\geq$ 2.4 $\cap$ Ndd1 $\geq$ 4.27   | 7.05E-9  |
| Fkh2 $\geq$ 3.51 $\cap$ Swi4 $\geq$ 2.3   | 7.41E-9  |
| Mal13 $\geq$ 2.39 $\cap$ Swi4 $\geq$ 6.81 | 4.69E-6  |
| Ndd1 $\geq$ 4.74                          | 4.88E-6  |
| Hsf1 $\geq$ 3.32 $\cap$ Mal13 $\geq$ 3.12 | 2.37E-5  |
| Fkh2 $\geq$ 3.51 $\cap$ Ste12 $\geq$ 3.91 | 5.66E-5  |
| Fkh2 $\geq$ 3.51 $\cap$ Stb1 $\geq$ 3.54  | 5.66E-5  |
| Fkh2 $\geq$ 2.85 $\cap$ Mbp1 $\geq$ 8.42  | 5.66E-5  |
| Met4 $\geq$ 3.65 $\cap$ Swi4 $\geq$ 2.3   | 5.83E-5  |
| Met4 $\geq$ 4.42                          | 1.08E-4  |
| Mal33 $\geq$ 2.3 $\cap$ Swi4 $\geq$ 2.3   | 1.14E-4  |
| Ash1 $\geq$ 3.38                          | 1.14E-4  |
| Ndd1 $\geq$ 3.22 $\cap$ Swi4 $\geq$ 2.3   | 5.16E-4  |
| Hsf1 $\geq$ 2.45 $\cap$ Met4 $\geq$ 3.65  | 5.37E-4  |
| Ino4 $\geq$ 2.49 $\cap$ Swi4 $\geq$ 2.3   | 5.59E-4  |

| 140min                                    | <i>p</i> |
|-------------------------------------------|----------|
| Fkh2 $\geq$ 3.58 $\cap$ Mcm1 $\geq$ 2.44  | 3.89E-15 |
| Ndd1 $\geq$ 10.13                         | 4.74E-14 |
| Fkh2 $\geq$ 4.07                          | 4.97E-13 |
| Mcm1 $\geq$ 2.39 $\cap$ Ndd1 $\geq$ 2.8   | 6.78E-13 |
| Mcm1 $\geq$ 2.39                          | 2.3E-12  |
| Swi4 $\geq$ 3.69                          | 8.92E-11 |
| Fkh2 $\geq$ 5.32 $\cap$ Ndd1 $\geq$ 2.3   | 4.59E-9  |
| Fkh1 $\geq$ 2.66 $\cap$ Fkh2 $\geq$ 2.85  | 1.33E-7  |
| Mal13 $\geq$ 2.39 $\cap$ Swi4 $\geq$ 3.77 | 7.6E-7   |
| Met4 $\geq$ 4.66                          | 2.09E-6  |
| Hir2 $\geq$ 2.72 $\cap$ Met4 $\geq$ 4.66  | 3.84E-6  |
| Hir2 $\geq$ 5.2 $\cap$ Swi4 $\geq$ 3.69   | 4.97E-5  |
| Ash1 $\geq$ 2.85                          | 6.31E-5  |
| Ino4 $\geq$ 2.3 $\cap$ Swi4 $\geq$ 3.77   | 9.05E-5  |
| Ino4 $\geq$ 2.43 $\cap$ Met4 $\geq$ 3.38  | 9.52E-5  |
| Hsf1 $\geq$ 3.35 $\cap$ Swi4 $\geq$ 3.77  | 9.52E-5  |
| Gcn4 $\geq$ 3.86                          | 9.52E-5  |
| Fkh1 $\geq$ 2.66 $\cap$ Mcm1 $\geq$ 2.39  | 1.9E-4   |
| Mal13 $\geq$ 3.44                         | 2.34E-4  |
| Mbp1 $\geq$ 2.38 $\cap$ Swi4 $\geq$ 3.77  | 4.35E-4  |
| Ino4 $\geq$ 2.49 $\cap$ Mal13 $\geq$ 3.44 | 4.44E-4  |
| Fkh1 $\geq$ 3.44 $\cap$ Ndd1 $\geq$ 2.3   | 4.44E-4  |
| Met4 $\geq$ 3.65 $\cap$ Swi4 $\geq$ 2.34  | 4.53E-4  |
| Mcm1 $\geq$ 2.39 $\cap$ Swi4 $\geq$ 2.34  | 4.53E-4  |
| Fkh2 $\geq$ 2.85 $\cap$ Swi4 $\geq$ 3.69  | 4.53E-4  |
| Ash1 $\geq$ 2.8 $\cap$ Swi4 $\geq$ 4.61   | 4.53E-4  |
| Ash1 $\geq$ 3.04 $\cap$ Mal13 $\geq$ 2.39 | 4.62E-4  |

| 150min                                                           | <i>p</i> |
|------------------------------------------------------------------|----------|
| Mcm1 $\geq$ 2.39 $\cap$ Ndd1 $\geq$ 3.65                         | 2.39E-16 |
| Fkh2 $\geq$ 2.6 $\cap$ Mcm1 $\geq$ 2.39                          | 4.18E-16 |
| Mcm1 $\geq$ 3.65                                                 | 4.96E-16 |
| Fkh2 $\geq$ 2.6 $\cap$ Mcm1 $\geq$ 2.39 $\cap$ Ndd1 $\geq$ 2.49  | 5.58E-15 |
| Ndd1 $\geq$ 10.13                                                | 6.66E-14 |
| Fkh2 $\geq$ 4.07                                                 | 2.99E-13 |
| Fkh2 $\geq$ 2.6 $\cap$ Ndd1 $\geq$ 2.47                          | 7.11E-12 |
| Fkh1 $\geq$ 2.66 $\cap$ Mcm1 $\geq$ 2.39                         | 3.69E-10 |
| Gcn4 $\geq$ 5.52                                                 | 4.11E-9  |
| Swi4 $\geq$ 4.61                                                 | 7.41E-9  |
| Fkh1 $\geq$ 3.82 $\cap$ Ndd1 $\geq$ 2.49                         | 4.35E-8  |
| Met4 $\geq$ 4.51                                                 | 9.93E-6  |
| Mth1 $\geq$ 2.92 $\cap$ Swi4 $\geq$ 4.61                         | 2.37E-5  |
| Ash1 $\geq$ 2.54 $\cap$ Mbp1 $\geq$ 2.36                         | 2.42E-5  |
| Ash1 $\geq$ 2.8 $\cap$ Swi4 $\geq$ 9.45                          | 5.66E-5  |
| Ash1 $\geq$ 2.83 $\cap$ Mcm1 $\geq$ 2.76                         | 5.71E-5  |
| Dal81 $\geq$ 8.95                                                | 5.77E-5  |
| Mal13 $\geq$ 3.51 $\cap$ Swi4 $\geq$ 6.81                        | 5.83E-5  |
| Ash1 $\geq$ 3.24                                                 | 9.61E-5  |
| Ash1 $\geq$ 3.24 $\cap$ Ecm22 $\geq$ 2.53                        | 1.14E-4  |
| Ash1 $\geq$ 2.54 $\cap$ Swi6 $\geq$ 2.35                         | 1.14E-4  |
| Hsf1 $\geq$ 3.32 $\cap$ Ino4 $\geq$ 2.43                         | 1.16E-4  |
| Mal33 $\geq$ 2.66 $\cap$ Swi4 $\geq$ 6.81                        | 2.69E-4  |
| Hsf1 $\geq$ 2.45 $\cap$ Met4 $\geq$ 4.51                         | 2.69E-4  |
| Gcn4 $\geq$ 3.86 $\cap$ Swi6 $\geq$ 2.33                         | 5.16E-4  |
| Ndd1 $\geq$ 2.8 $\cap$ Rlm1 $\geq$ 2.66                          | 5.21E-4  |
| Met4 $\geq$ 2.96 $\cap$ Mth1 $\geq$ 2.34                         | 5.21E-4  |
| Hsf1 $\geq$ 3.44 $\cap$ Swi4 $\geq$ 6.81                         | 5.21E-4  |
| Hir2 $\geq$ 3.96                                                 | 5.21E-4  |
| Grf10(pho2) $\geq$ 2.44 $\cap$ Ndd1 $\geq$ 2.47                  | 5.21E-4  |
| Ash1 $\geq$ 2.8 $\cap$ Phd1 $\geq$ 4.02                          | 5.21E-4  |
| Ndd1 $\geq$ 2.3 $\cap$ Ste12 $\geq$ 2.65                         | 5.31E-4  |
| Hap2 $\geq$ 3.82                                                 | 5.31E-4  |
| Fkh2 $\geq$ 2.53 $\cap$ Swi4 $\geq$ 4.66                         | 5.31E-4  |
| Cin5 $\geq$ 2.92 $\cap$ Ndd1 $\geq$ 2.3                          | 5.31E-4  |
| Ash1 $\geq$ 2.98 $\cap$ Mth1 $\geq$ 3.04                         | 5.31E-4  |
| Ash1 $\geq$ 2.98 $\cap$ Mal13 $\geq$ 3.61                        | 5.31E-4  |
| Met4 $\geq$ 3.38 $\cap$ Put3 $\geq$ 2.51                         | 5.37E-4  |
| Mcm1 $\geq$ 2.39 $\cap$ Swi6 $\geq$ 2.33                         | 5.37E-4  |
| Ino2 $\geq$ 2.3 $\cap$ Mcm1 $\geq$ 2.39                          | 5.37E-4  |
| Fkh2 $\geq$ 2.6 $\cap$ Mth1 $\geq$ 2.33                          | 5.37E-4  |
| Ash1 $\geq$ 2.98 $\cap$ Ecm22 $\geq$ 2.4 $\cap$ Mth1 $\geq$ 3.04 | 5.37E-4  |
| Ash1 $\geq$ 2.58 $\cap$ Dal82 $\geq$ 2.54                        | 5.37E-4  |
| Mth1 $\geq$ 5.13                                                 | 5.48E-4  |
| Cup9 $\geq$ 3.41                                                 | 6.3E-4   |
| Gcn4 $\geq$ 6.07 $\cap$ Mcm1 $\geq$ 2.39                         | 7.54E-4  |

| 160min                                                           | <i>p</i> |
|------------------------------------------------------------------|----------|
| Ndd1 $\geq$ 2.38                                                 | 1.36E-14 |
| Mcm1 $\geq$ 4.02                                                 | 4.65E-14 |
| Fkh1 $\geq$ 3.41 $\cap$ Ndd1 $\geq$ 2.38                         | 6.78E-13 |
| Mcm1 $\geq$ 3.82 $\cap$ Ndd1 $\geq$ 3.73                         | 1.72E-12 |
| Fkh2 $\geq$ 3.24 $\cap$ Ndd1 $\geq$ 2.3                          | 8.81E-10 |
| Fkh2 $\geq$ 9.76 $\cap$ Mcm1 $\geq$ 3.82                         | 1.35E-9  |
| Fkh1 $\geq$ 2.66 $\cap$ Mcm1 $\geq$ 2.39                         | 1.37E-6  |
| Gcn4 $\geq$ 4.34                                                 | 2.26E-6  |
| Hsf1 $\geq$ 4.61 $\cap$ Skn7 $\geq$ 2.66                         | 4.16E-6  |
| Swi4 $\geq$ 2.34                                                 | 6.52E-6  |
| Ino4 $\geq$ 2.49 $\cap$ Swi4 $\geq$ 2.34                         | 1.9E-5   |
| Hsf1 $\geq$ 4.61                                                 | 1.9E-5   |
| Hsf1 $\geq$ 3.44 $\cap$ Ino4 $\geq$ 2.43                         | 1.9E-5   |
| Hsf1 $\geq$ 3.44 $\cap$ Swi4 $\geq$ 2.34                         | 2.02E-5  |
| Hsf1 $\geq$ 4.61 $\cap$ Ino4 $\geq$ 2.43 $\cap$ Met4 $\geq$ 3.65 | 5.17E-5  |
| Dal81 $\geq$ 8.95                                                | 5.38E-5  |
| Ino4 $\geq$ 2.41 $\cap$ Ndd1 $\geq$ 2.3                          | 1E-4     |
| Cup9 $\geq$ 2.3 $\cap$ Ndd1 $\geq$ 2.3                           | 1E-4     |
| Met4 $\geq$ 3.38                                                 | 1.34E-4  |
| Mal13 $\geq$ 2.39 $\cap$ Swi4 $\geq$ 2.34                        | 4.71E-4  |
| Ace2 $\geq$ 2.34 $\cap$ Swi4 $\geq$ 2.34                         | 4.71E-4  |
| Ndd1 $\geq$ 2.53 $\cap$ Swi4 $\geq$ 2.34                         | 4.95E-4  |
