# Supplementary material for: An ensemble learning approach to reverse-engineering transcriptional regulatory networks from time-series gene expression data
Source: PubMed Central journal article supplement (PMC2709269; doi:10.1186/1471-2164-10-s1-s8), 2009-07-07
Supplement: 1471-2164-10-S1-S8-S2.pdf [file 1471-2164-10-S1-S8-S2.pdf]

**Supplementary Table 2.** Regulatory rules learned from  $\alpha$ -factor data set.

| 7min                                     | <i>p</i> |
|------------------------------------------|----------|
| Mbp1 $\geq$ 2.36 $\cap$ Swi4 $\geq$ 2.72 | 4.88E-6  |
| Mbp1 $\geq$ 2.33                         | 6.08E-6  |
| Swi4 $\geq$ 2.72                         | 8.38E-6  |
| Ndd1 $\geq$ 3.69                         | 2.42E-5  |
| Fkh1 $\geq$ 2.42 $\cap$ Mbp1 $\geq$ 2.33 | 2.42E-5  |
| Ash1 $\geq$ 3.06                         | 2.52E-5  |
| Swi4 $\geq$ 2.72 $\cap$ Swi6 $\geq$ 4.27 | 2.98E-5  |
| Mbp1 $\geq$ 5.17 $\cap$ Swi6 $\geq$ 4.27 | 6.31E-5  |
| Gat1 $\geq$ 2.47 $\cap$ Put3 $\geq$ 2.8  | 9.23E-5  |
| Swi6 $\geq$ 4.27                         | 9.52E-5  |
| Fkh1 $\geq$ 2.67 $\cap$ Ndd1 $\geq$ 2.86 | 1.13E-4  |
| Sok2 $\geq$ 3.54                         | 1.21E-4  |
| Fkh1 $\geq$ 2.32 $\cap$ Swi4 $\geq$ 2.72 | 1.25E-4  |
| Fkh2 $\geq$ 2.38 $\cap$ Ndd1 $\geq$ 2.86 | 1.72E-4  |
| Yap6 $\geq$ 4.07                         | 5.42E-4  |
| Mbp1 $\geq$ 2.33 $\cap$ Phd1 $\geq$ 2.83 | 5.42E-4  |
| Mbp1 $\geq$ 2.33 $\cap$ Ndd1 $\geq$ 3.27 | 5.42E-4  |
| Put3 $\geq$ 2.92                         | 5.53E-4  |
| Phd1 $\geq$ 3.12                         | 5.53E-4  |
| Gal4 $\geq$ 3.06                         | 5.53E-4  |

  

| 14min                                     | <i>p</i> |
|-------------------------------------------|----------|
| Mbp1 $\geq$ 6.21                          | 5.98E-19 |
| Mbp1 $\geq$ 2.72 $\cap$ Swi4 $\geq$ 2.34  | 6.92E-17 |
| Swi4 $\geq$ 2.86                          | 3.22E-15 |
| Mbp1 $\geq$ 6.21 $\cap$ Swi6 $\geq$ 4.27  | 4.17E-15 |
| Gat3 $\geq$ 8.42                          | 8.57E-15 |
| Swi6 $\geq$ 3.77                          | 4.29E-14 |
| Swi4 $\geq$ 2.86 $\cap$ Swi6 $\geq$ 4.27  | 2.67E-12 |
| Yap5 $\geq$ 8.18                          | 3.44E-10 |
| Stb1 $\geq$ 2.96 $\cap$ Swi4 $\geq$ 2.86  | 3.44E-10 |
| Rgm1 $\geq$ 4.02                          | 3.62E-10 |
| Msn4 $\geq$ 4.42                          | 3.62E-10 |
| Ndd1 $\geq$ 3.27 $\cap$ Swi4 $\geq$ 2.86  | 1.06E-8  |
| Mal13 $\geq$ 2.51 $\cap$ Mbp1 $\geq$ 2.72 | 5.5E-6   |
| Ecm22 $\geq$ 2.65 $\cap$ Met4 $\geq$ 3.73 | 6.38E-5  |
| Ino4 $\geq$ 2.49 $\cap$ Met4 $\geq$ 3.73  | 5.81E-4  |
| Ash1 $\geq$ 2.39 $\cap$ Met4 $\geq$ 3.73  | 5.81E-4  |
| Phd1 $\geq$ 5.08                          | 5.93E-4  |
| Ace2 $\geq$ 2.43 $\cap$ Swi4 $\geq$ 2.34  | 5.93E-4  |
| Hsf1 $\geq$ 2.58 $\cap$ Swi4 $\geq$ 2.34  | 6.05E-4  |

| 21min                                                            | <i>p</i> |
|------------------------------------------------------------------|----------|
| Mbp1 $\geq$ 4.93                                                 | 4.42E-26 |
| Mbp1 $\geq$ 4.93 $\cap$ Swi6 $\geq$ 4.65                         | 7.24E-19 |
| Swi6 $\geq$ 3.08                                                 | 2.55E-18 |
| Gat3 $\geq$ 8.42                                                 | 1.17E-13 |
| Swi4 $\geq$ 2.36 $\cap$ Swi6 $\geq$ 3.08                         | 1.55E-12 |
| Yap5 $\geq$ 8.18                                                 | 1.9E-9   |
| Stb1 $\geq$ 2.41 $\cap$ Swi6 $\geq$ 3.08                         | 2E-9     |
| Stb1 $\geq$ 3.24 $\cap$ Swi4 $\geq$ 5.3                          | 4.47E-7  |
| Stb1 $\geq$ 3.51                                                 | 5.56E-6  |
| Swi4 $\geq$ 3.15                                                 | 9.73E-6  |
| Ino4 $\geq$ 2.59 $\cap$ Met4 $\geq$ 3.82 $\cap$ Put3 $\geq$ 2.85 | 6.19E-5  |
| Ino4 $\geq$ 2.96 $\cap$ Met4 $\geq$ 3.82 $\cap$ Rox1 $\geq$ 2.5  | 6.25E-5  |
| Ino4 $\geq$ 2.59 $\cap$ Met4 $\geq$ 3.82                         | 1.23E-4  |
| Met4 $\geq$ 3.82                                                 | 6.43E-4  |

| 28min                                     | <i>p</i> |
|-------------------------------------------|----------|
| Mbp1 $\geq$ 2.38 $\cap$ Swi4 $\geq$ 3.73  | 1.15E-22 |
| Swi4 $\geq$ 3.73                          | 1.02E-18 |
| Mbp1 $\geq$ 2.38                          | 1.66E-17 |
| Stb1 $\geq$ 2.43 $\cap$ Swi4 $\geq$ 3.73  | 3.16E-16 |
| Swi4 $\geq$ 3.73 $\cap$ Swi6 $\geq$ 2.67  | 2.05E-15 |
| Mbp1 $\geq$ 2.38 $\cap$ Swi6 $\geq$ 2.67  | 2.34E-15 |
| Swi6 $\geq$ 3.19                          | 4.29E-14 |
| Mal13 $\geq$ 2.39 $\cap$ Swi4 $\geq$ 3.73 | 1.31E-11 |
| Met4 $\geq$ 3.73 $\cap$ Swi4 $\geq$ 3.73  | 2.03E-10 |
| Fkh2 $\geq$ 3.51 $\cap$ Swi4 $\geq$ 3.73  | 3.49E-8  |
| Ecm22 $\geq$ 2.43 $\cap$ Swi4 $\geq$ 3.73 | 4.17E-7  |
| Hir2 $\geq$ 5.2 $\cap$ Swi4 $\geq$ 3.73   | 4.3E-7   |
| Ino4 $\geq$ 2.59 $\cap$ Met4 $\geq$ 3.73  | 9.28E-7  |
| Ndd1 $\geq$ 4.07 $\cap$ Swi4 $\geq$ 3.73  | 2.3E-5   |
| Stb1 $\geq$ 3.51 $\cap$ Swi6 $\geq$ 2.67  | 2.39E-5  |
| Hir1 $\geq$ 3.96 $\cap$ Mbp1 $\geq$ 2.38  | 6.25E-5  |
| Mbp1 $\geq$ 2.38 $\cap$ Yap1 $\geq$ 2.67  | 1.21E-4  |
| Fkh2 $\geq$ 2.88 $\cap$ Met4 $\geq$ 3.73  | 1.21E-4  |
| Met4 $\geq$ 3.73                          | 1.57E-4  |
| Stb1 $\geq$ 3.32                          | 5.59E-4  |
| Hsf1 $\geq$ 3.32 $\cap$ Mbp1 $\geq$ 2.38  | 5.59E-4  |
| Fkh2 $\geq$ 4.51 $\cap$ Mbp1 $\geq$ 2.38  | 5.59E-4  |
| Ino4 $\geq$ 2.59 $\cap$ Swi4 $\geq$ 3.73  | 5.87E-4  |

| 35min                                                            | <i>p</i> |
|------------------------------------------------------------------|----------|
| Swi4 $\geq$ 6.81                                                 | 1.59E-22 |
| Swi4 $\geq$ 2.94 $\cap$ Swi6 $\geq$ 3.19                         | 1.01E-18 |
| Mbp1 $\geq$ 2.38 $\cap$ Swi4 $\geq$ 2.94                         | 1.9E-16  |
| Stb1 $\geq$ 3.51 $\cap$ Swi4 $\geq$ 2.94                         | 5.97E-14 |
| Hsf1 $\geq$ 3.32 $\cap$ Swi4 $\geq$ 3.73                         | 5.97E-14 |
| Ash1 $\geq$ 2.5 $\cap$ Swi4 $\geq$ 2.94                          | 5.55E-13 |
| Fkh2 $\geq$ 2.4 $\cap$ Swi4 $\geq$ 2.94                          | 6.91E-13 |
| Fkh2 $\geq$ 2.4 $\cap$ Swi4 $\geq$ 2.94 $\cap$ Swi6 $\geq$ 2.35  | 1.4E-11  |
| Met4 $\geq$ 3.73 $\cap$ Swi4 $\geq$ 2.94                         | 1.93E-10 |
| Ino4 $\geq$ 2.3 $\cap$ Swi4 $\geq$ 2.94                          | 6.49E-8  |
| Ecm22 $\geq$ 2.4 $\cap$ Swi4 $\geq$ 2.94                         | 1.8E-7   |
| Mal33 $\geq$ 2.66 $\cap$ Swi4 $\geq$ 2.94                        | 4.17E-7  |
| Ash1 $\geq$ 2.73 $\cap$ Fkh2 $\geq$ 2.4 $\cap$ Swi4 $\geq$ 2.94  | 4.17E-7  |
| Put3 $\geq$ 2.85 $\cap$ Swi4 $\geq$ 2.94                         | 4.98E-6  |
| Stb1 $\geq$ 3.51 $\cap$ Swi4 $\geq$ 2.94 $\cap$ Swi6 $\geq$ 2.35 | 5.24E-6  |
| Hir1 $\geq$ 3.96 $\cap$ Swi4 $\geq$ 2.94                         | 6.01E-5  |
| Gat1 $\geq$ 3.54 $\cap$ Met4 $\geq$ 2.34                         | 6.01E-5  |
| Dal82 $\geq$ 2.58 $\cap$ Swi4 $\geq$ 2.94                        | 6.01E-5  |
| Mal13 $\geq$ 3.38 $\cap$ Swi4 $\geq$ 2.94                        | 1.19E-4  |
| Grf10(pho2) $\geq$ 2.98 $\cap$ Swi4 $\geq$ 2.94                  | 5.48E-4  |
| Fkh1 $\geq$ 3.15 $\cap$ Swi4 $\geq$ 2.94                         | 5.64E-4  |
| Fkh2 $\geq$ 2.72 $\cap$ Met4 $\geq$ 3.73 $\cap$ Swi4 $\geq$ 2.94 | 7.25E-4  |
| Met4 $\geq$ 6.07 $\cap$ Rox1 $\geq$ 2.6                          | 7.32E-4  |
| Ino2 $\geq$ 2.9 $\cap$ Met4 $\geq$ 6.07                          | 7.32E-4  |

| 42min                                                            | <i>p</i> |
|------------------------------------------------------------------|----------|
| Swi4 $\geq$ 5.6                                                  | 7.59E-22 |
| Fkh2 $\geq$ 4.07 $\cap$ Ndd1 $\geq$ 2.56                         | 1.1E-19  |
| Fkh2 $\geq$ 3.51                                                 | 1.13E-17 |
| Fkh2 $\geq$ 4.07 $\cap$ Swi4 $\geq$ 3.77                         | 2.9E-17  |
| Ndd1 $\geq$ 4.34                                                 | 3.08E-14 |
| Mbp1 $\geq$ 2.81                                                 | 3.08E-14 |
| Swi4 $\geq$ 2.33 $\cap$ Swi6 $\geq$ 2.35                         | 5.28E-13 |
| Fkh2 $\geq$ 4.07 $\cap$ Mcm1 $\geq$ 4.77                         | 1.25E-12 |
| Ash1 $\geq$ 2.63 $\cap$ Swi4 $\geq$ 2.94                         | 1.25E-12 |
| Fkh2 $\geq$ 2.4 $\cap$ Mbp1 $\geq$ 2.38                          | 4.43E-11 |
| Ash1 $\geq$ 2.3 $\cap$ Fkh2 $\geq$ 2.4                           | 4.43E-11 |
| Mal13 $\geq$ 2.39 $\cap$ Swi4 $\geq$ 5.6                         | 2.24E-10 |
| Ecm22 $\geq$ 2.4 $\cap$ Swi4 $\geq$ 5.6                          | 2.95E-9  |
| Fkh2 $\geq$ 4.07 $\cap$ Hsf1 $\geq$ 3.32                         | 3.67E-8  |
| Ino4 $\geq$ 2.59 $\cap$ Swi4 $\geq$ 2.94                         | 4.14E-8  |
| Hsf1 $\geq$ 3.17 $\cap$ Swi4 $\geq$ 2.94                         | 4.14E-8  |
| Mbp1 $\geq$ 2.55 $\cap$ Swi4 $\geq$ 2.94                         | 4.61E-7  |
| Fkh2 $\geq$ 3.51 $\cap$ Ste12 $\geq$ 3.91 $\cap$ Swi4 $\geq$ 5.6 | 4.61E-7  |
| Mcm1 $\geq$ 2.39 $\cap$ Ndd1 $\geq$ 2.47                         | 5.45E-6  |
| Hsf1 $\geq$ 3.17 $\cap$ Mal13 $\geq$ 2.66                        | 5.45E-6  |
| Msn4 $\geq$ 2.44 $\cap$ Swi4 $\geq$ 5.6                          | 5.5E-6   |
| Mal33 $\geq$ 2.66 $\cap$ Swi4 $\geq$ 3.77                        | 5.56E-6  |
| Hir2 $\geq$ 5.2                                                  | 2.47E-5  |
| Met4 $\geq$ 3.51                                                 | 2.57E-5  |
| Hsf1 $\geq$ 3.17 $\cap$ Mbp1 $\geq$ 2.38                         | 2.65E-5  |
| Hir1 $\geq$ 17.5                                                 | 6.25E-5  |
| Hir1 $\geq$ 17.5 $\cap$ Met4 $\geq$ 3.51                         | 6.51E-5  |
| Rgm1 $\geq$ 2.3 $\cap$ Swi4 $\geq$ 2.33                          | 1.27E-4  |
| Met4 $\geq$ 3.51 $\cap$ Put3 $\geq$ 3.58                         | 2.86E-4  |
| Ino4 $\geq$ 2.59 $\cap$ Met4 $\geq$ 3.51                         | 5.64E-4  |
| Hir2 $\geq$ 3.0 $\cap$ Swi4 $\geq$ 2.33                          | 5.76E-4  |

| 49min                                                           | <i>p</i> |
|-----------------------------------------------------------------|----------|
| Fkh2 $\geq$ 4.98                                                | 5.09E-18 |
| Ndd1 $\geq$ 7.85                                                | 1.15E-17 |
| Fkh2 $\geq$ 4.98 $\cap$ Mcm1 $\geq$ 3.24                        | 1.24E-11 |
| Fkh2 $\geq$ 2.3 $\cap$ Ndd1 $\geq$ 3.73                         | 2.51E-11 |
| Mcm1 $\geq$ 2.39 $\cap$ Ndd1 $\geq$ 2.81                        | 1.44E-10 |
| Swi4 $\geq$ 2.55                                                | 1.15E-8  |
| Mbp1 $\geq$ 2.36                                                | 6.11E-8  |
| Ino4 $\geq$ 2.3 $\cap$ Mbp1 $\geq$ 2.36 $\cap$ Swi4 $\geq$ 3.77 | 3.97E-7  |
| Mbp1 $\geq$ 2.36 $\cap$ Swi4 $\geq$ 2.94                        | 2.14E-5  |
| Ino4 $\geq$ 2.3 $\cap$ Mbp1 $\geq$ 2.36                         | 2.25E-5  |
| Hsf1 $\geq$ 3.44 $\cap$ Swi4 $\geq$ 2.94                        | 2.25E-5  |
| Hsf1 $\geq$ 2.33 $\cap$ Mbp1 $\geq$ 2.36                        | 2.35E-5  |
| Hir2 $\geq$ 2.54                                                | 3.3E-5   |
| Ecm22 $\geq$ 2.43 $\cap$ Mbp1 $\geq$ 2.36                       | 6.01E-5  |
| Ash1 $\geq$ 2.63 $\cap$ Fkh2 $\geq$ 4.98                        | 6.38E-5  |
| Ino4 $\geq$ 2.3 $\cap$ Swi4 $\geq$ 6.81                         | 2.86E-4  |
| Met4 $\geq$ 5.08                                                | 5.42E-4  |
| Hir2 $\geq$ 3.0 $\cap$ Swi4 $\geq$ 2.55                         | 5.42E-4  |
| Hir2 $\geq$ 3.02 $\cap$ Mbp1 $\geq$ 2.36                        | 5.59E-4  |
| Hir1 $\geq$ 3.96                                                | 5.59E-4  |
| Mth1 $\geq$ 5.74                                                | 7.03E-4  |
| Ecm22 $\geq$ 2.43 $\cap$ Swi4 $\geq$ 6.81                       | 7.1E-4   |
| Hir1 $\geq$ 3.96 $\cap$ Hir2 $\geq$ 3.0                         | 7.25E-4  |
| Fkh2 $\geq$ 4.98 $\cap$ Hir2 $\geq$ 5.71                        | 7.25E-4  |
| Hir2 $\geq$ 3.0 $\cap$ Ino4 $\geq$ 3.12                         | 7.32E-4  |

| 56min                                                           | <i>p</i> |
|-----------------------------------------------------------------|----------|
| Ndd1 $\geq$ 2.8                                                 | 1.49E-20 |
| Fkh2 $\geq$ 4.61 $\cap$ Ndd1 $\geq$ 2.8                         | 7.31E-19 |
| Mcm1 $\geq$ 2.39 $\cap$ Ndd1 $\geq$ 2.8                         | 6.09E-14 |
| Fkh2 $\geq$ 4.61                                                | 6.09E-14 |
| Fkh2 $\geq$ 4.61 $\cap$ Mcm1 $\geq$ 3.02 $\cap$ Ndd1 $\geq$ 2.8 | 6.01E-5  |
| Cup9 $\geq$ 2.76 $\cap$ Ndd1 $\geq$ 2.8                         | 7.1E-4   |
| Ndd1 $\geq$ 2.8 $\cap$ Sok2 $\geq$ 2.85                         | 7.25E-4  |
| Ino4 $\geq$ 2.81 $\cap$ Met4 $\geq$ 4.14                        | 7.25E-4  |
| Cin5 $\geq$ 4.2 $\cap$ Ndd1 $\geq$ 2.8                          | 7.25E-4  |
| Ash1 $\geq$ 2.5 $\cap$ Met4 $\geq$ 4.14                         | 7.25E-4  |

| 63min                                     | <i>p</i> |
|-------------------------------------------|----------|
| Ndd1 $\geq$ 3.82                          | 1.09E-10 |
| Mcm1 $\geq$ 3.12 $\cap$ Ndd1 $\geq$ 2.63  | 1.53E-9  |
| Fkh2 $\geq$ 3.38                          | 3.72E-9  |
| Mcm1 $\geq$ 2.65                          | 7.05E-9  |
| Swi5 $\geq$ 7.4                           | 2.8E-8   |
| Swi4 $\geq$ 2.51                          | 2.48E-7  |
| Fkh2 $\geq$ 4.73 $\cap$ Ndd1 $\geq$ 2.63  | 3.96E-6  |
| Cin5 $\geq$ 4.2 $\cap$ Ndd1 $\geq$ 2.63   | 4.74E-6  |
| Mcm1 $\geq$ 2.81 $\cap$ Swi5 $\geq$ 3.41  | 4.88E-6  |
| Swi4 $\geq$ 2.51 $\cap$ Swi6 $\geq$ 2.35  | 2.19E-5  |
| Mbp1 $\geq$ 4.27 $\cap$ Swi6 $\geq$ 2.55  | 2.62E-5  |
| Ndd1 $\geq$ 2.63 $\cap$ Swi6 $\geq$ 3.58  | 5.21E-4  |
| Cin5 $\geq$ 4.34                          | 5.37E-4  |
| Rim101 $\geq$ 2.3 $\cap$ Swi5 $\geq$ 2.47 | 5.59E-4  |
| Phd1 $\geq$ 3.3                           | 6.11E-4  |
| Hsf1 $\geq$ 2.92 $\cap$ Swi4 $\geq$ 2.86  | 7.03E-4  |
| Hir2 $\geq$ 2.7 $\cap$ Ixr1 $\geq$ 2.43   | 7.03E-4  |

| 70min                                                            | <i>p</i> |
|------------------------------------------------------------------|----------|
| Mbp1 $\geq$ 4.27 $\cap$ Swi4 $\geq$ 2.86                         | 1.57E-19 |
| Swi5 $\geq$ 3.24                                                 | 4.9E-19  |
| Mbp1 $\geq$ 4.93                                                 | 2.04E-17 |
| Swi4 $\geq$ 2.86 $\cap$ Swi6 $\geq$ 2.32                         | 6.31E-16 |
| Swi4 $\geq$ 2.51                                                 | 1.31E-15 |
| Swi6 $\geq$ 4.71                                                 | 1.04E-13 |
| Mbp1 $\geq$ 2.72 $\cap$ Swi6 $\geq$ 3.58                         | 1.84E-12 |
| Mcm1 $\geq$ 2.3 $\cap$ Swi4 $\geq$ 2.51                          | 4.37E-10 |
| Smp1 $\geq$ 3.47 $\cap$ Swi5 $\geq$ 4.42                         | 4.06E-8  |
| Mcm1 $\geq$ 3.47 $\cap$ Swi6 $\geq$ 3.41                         | 5.42E-8  |
| Mbp1 $\geq$ 2.36 $\cap$ Stb1 $\geq$ 3.02                         | 5.64E-8  |
| Ace2 $\geq$ 2.73 $\cap$ Swi5 $\geq$ 2.92                         | 2.66E-7  |
| Ndd1 $\geq$ 2.63                                                 | 3.7E-7   |
| Mcm1 $\geq$ 2.62 $\cap$ Swi5 $\geq$ 4.42                         | 4.8E-7   |
| Yap5 $\geq$ 10.52                                                | 3.21E-6  |
| Gat3 $\geq$ 9.92                                                 | 5.56E-6  |
| Mal13 $\geq$ 3.22 $\cap$ Yap5 $\geq$ 10.52                       | 5.67E-6  |
| Ino4 $\geq$ 2.47 $\cap$ Swi5 $\geq$ 6.81                         | 5.67E-6  |
| Stb1 $\geq$ 3.51 $\cap$ Swi6 $\geq$ 3.58                         | 6.02E-6  |
| Stb1 $\geq$ 3.51 $\cap$ Swi4 $\geq$ 4.42                         | 6.02E-6  |
| Fkh2 $\geq$ 8.29                                                 | 2.89E-5  |
| Msn2 $\geq$ 2.98 $\cap$ Swi5 $\geq$ 4.42                         | 6.51E-5  |
| Gen4 $\geq$ 2.4 $\cap$ Swi5 $\geq$ 4.42                          | 6.51E-5  |
| Cin5 $\geq$ 2.83 $\cap$ Swi4 $\geq$ 2.51                         | 1.31E-4  |
| Mbp1 $\geq$ 2.36 $\cap$ Mcm1 $\geq$ 4.34                         | 1.34E-4  |
| Ash1 $\geq$ 2.3 $\cap$ Swi5 $\geq$ 2.92                          | 1.34E-4  |
| Ino4 $\geq$ 2.47 $\cap$ Swi4 $\geq$ 4.42 $\cap$ Swi6 $\geq$ 2.32 | 3.04E-4  |
| Mcm1 $\geq$ 2.39 $\cap$ Ndd1 $\geq$ 2.63                         | 5.99E-4  |
| Fkh2 $\geq$ 8.29 $\cap$ Ndd1 $\geq$ 2.63                         | 5.99E-4  |
| Fkh2 $\geq$ 5.55 $\cap$ Swi4 $\geq$ 2.51                         | 6.05E-4  |

| 77min                                                            | <i>p</i> |
|------------------------------------------------------------------|----------|
| Swi4 $\geq$ 2.47 $\cap$ Swi6 $\geq$ 3.04                         | 8.14E-22 |
| Mbp1 $\geq$ 6.21                                                 | 1.07E-21 |
| Mbp1 $\geq$ 4.27 $\cap$ Swi6 $\geq$ 2.55                         | 3.6E-20  |
| Swi4 $\geq$ 2.86                                                 | 1.29E-18 |
| Mbp1 $\geq$ 4.93 $\cap$ Swi4 $\geq$ 5.6                          | 4.15E-17 |
| Stb1 $\geq$ 3.02 $\cap$ Swi4 $\geq$ 2.86                         | 8.66E-15 |
| Swi6 $\geq$ 3.41                                                 | 1.06E-14 |
| Yap5 $\geq$ 11.56                                                | 1.32E-12 |
| Gat3 $\geq$ 8.42                                                 | 1.47E-11 |
| Mbp1 $\geq$ 4.27 $\cap$ Swi4 $\geq$ 2.86 $\cap$ Swi6 $\geq$ 2.32 | 4.41E-9  |
| Swi5 $\geq$ 2.85                                                 | 2.92E-8  |
| Mbp1 $\geq$ 2.36 $\cap$ Stb1 $\geq$ 3.02                         | 4.27E-8  |
| Stb1 $\geq$ 3.3 $\cap$ Swi6 $\geq$ 2.32                          | 4.21E-7  |
| Fkh2 $\geq$ 2.4 $\cap$ Swi4 $\geq$ 2.47                          | 9.17E-6  |
| Gcn4 $\geq$ 2.4 $\cap$ Swi5 $\geq$ 2.85                          | 6.07E-5  |
| Mbp1 $\geq$ 2.36 $\cap$ Sum1 $\geq$ 2.3                          | 1.2E-4   |
| Mcm1 $\geq$ 2.3 $\cap$ Swi4 $\geq$ 2.86                          | 1.25E-4  |
| Ace2 $\geq$ 2.83 $\cap$ Swi5 $\geq$ 7.52                         | 2.8E-4   |
| Mbp1 $\geq$ 2.3 $\cap$ Phd1 $\geq$ 3.12                          | 5.48E-4  |
| Mbp1 $\geq$ 2.36 $\cap$ Swi5 $\geq$ 5.84                         | 5.48E-4  |
| Stb1 $\geq$ 4.42                                                 | 5.59E-4  |
| Ash1 $\geq$ 3.96 $\cap$ Swi4 $\geq$ 2.47                         | 5.59E-4  |

| 84min                                                                         | <i>p</i> |
|-------------------------------------------------------------------------------|----------|
| $\text{Swi4} \geq 2.47 \cap \text{Swi6} \geq 2.67$                            | 1.83E-25 |
| $\text{Swi4} \geq 2.47$                                                       | 2.58E-23 |
| $\text{Stb1} \geq 2.43 \cap \text{Swi4} \geq 2.47 \cap \text{Swi6} \geq 2.67$ | 1.18E-20 |
| $\text{Mbp1} \geq 2.38 \cap \text{Swi4} \geq 2.47$                            | 1.57E-20 |
| $\text{Stb1} \geq 3.04 \cap \text{Swi4} \geq 3.77$                            | 1.77E-19 |
| $\text{Swi6} \geq 2.67$                                                       | 6.11E-19 |
| $\text{Mbp1} \geq 2.36$                                                       | 4.47E-18 |
| $\text{Ash1} \geq 2.73 \cap \text{Swi4} \geq 2.47$                            | 1.88E-12 |
| $\text{Mbp1} \geq 2.36 \cap \text{Swi6} \geq 3.24$                            | 2.55E-10 |
| $\text{Mbp1} \geq 2.36 \cap \text{Stb1} \geq 3.04$                            | 3.24E-10 |
| $\text{Met4} \geq 2.78 \cap \text{Swi4} \geq 3.77$                            | 4.44E-8  |
| $\text{Mbp1} \geq 2.36 \cap \text{Met4} \geq 2.78$                            | 4.62E-8  |
| $\text{Ino4} \geq 2.47 \cap \text{Swi4} \geq 2.47$                            | 1.2E-6   |
| $\text{Hir1} \geq 3.41 \cap \text{Swi4} \geq 2.86$                            | 5.4E-6   |
| $\text{Hir2} \geq 2.51 \cap \text{Swi4} \geq 2.86$                            | 5.45E-6  |
| $\text{Put3} \geq 2.45 \cap \text{Swi4} \geq 3.77$                            | 5.56E-6  |
| $\text{Swi4} \geq 2.86 \cap \text{Yap1} \geq 2.67$                            | 2.7E-5   |
| $\text{Met4} \geq 4.51$                                                       | 2.7E-5   |
| $\text{Hir2} \geq 5.2$                                                        | 2.7E-5   |
| $\text{Swi5} \geq 7.4$                                                        | 3.1E-5   |
| $\text{Fkh1} \geq 2.66 \cap \text{Swi4} \geq 2.86 \cap \text{Swi6} \geq 2.32$ | 6.31E-5  |
| $\text{Stb1} \geq 3.3 \cap \text{Swi6} \geq 2.32$                             | 5.87E-4  |
| $\text{Mal13} \geq 2.66 \cap \text{Swi4} \geq 2.47$                           | 6.05E-4  |
| $\text{Stb1} \geq 3.3$                                                        | 6.49E-4  |

| 91min                                                            | <i>p</i> |
|------------------------------------------------------------------|----------|
| Mbp1 $\geq$ 2.38 $\cap$ Swi4 $\geq$ 3.77                         | 9.72E-21 |
| Swi4 $\geq$ 6.81                                                 | 3.92E-18 |
| Swi4 $\geq$ 5.3 $\cap$ Swi6 $\geq$ 2.67                          | 1.6E-15  |
| Mbp1 $\geq$ 2.38                                                 | 3.22E-15 |
| Mbp1 $\geq$ 2.38 $\cap$ Swi4 $\geq$ 3.77 $\cap$ Swi6 $\geq$ 2.67 | 2.88E-14 |
| Hsf1 $\geq$ 2.49 $\cap$ Mbp1 $\geq$ 2.38                         | 3.08E-14 |
| Stb1 $\geq$ 2.43 $\cap$ Swi4 $\geq$ 5.3                          | 5.07E-13 |
| Ino4 $\geq$ 2.3 $\cap$ Swi4 $\geq$ 3.77                          | 8.42E-12 |
| Ash1 $\geq$ 2.55 $\cap$ Mbp1 $\geq$ 2.38 $\cap$ Swi4 $\geq$ 3.77 | 1.33E-10 |
| Mbp1 $\geq$ 2.38 $\cap$ Swi6 $\geq$ 2.67                         | 4.42E-10 |
| Hsf1 $\geq$ 2.49 $\cap$ Swi4 $\geq$ 2.72                         | 2.95E-9  |
| Ash1 $\geq$ 2.5 $\cap$ Mbp1 $\geq$ 2.38                          | 1.86E-8  |
| Mbp1 $\geq$ 2.38 $\cap$ Stb1 $\geq$ 3.51                         | 6.54E-7  |
| Hsf1 $\geq$ 3.61 $\cap$ Mbp1 $\geq$ 2.38 $\cap$ Swi4 $\geq$ 3.77 | 4.51E-6  |
| Mbp1 $\geq$ 2.38 $\cap$ Stb1 $\geq$ 2.43 $\cap$ Swi6 $\geq$ 2.67 | 4.69E-6  |
| Ino4 $\geq$ 2.59 $\cap$ Mbp1 $\geq$ 2.38 $\cap$ Swi4 $\geq$ 3.77 | 4.74E-6  |
| Hir1 $\geq$ 17.5                                                 | 5.6E-5   |
| Hir1 $\geq$ 3.96 $\cap$ Swi4 $\geq$ 3.77                         | 5.83E-5  |
| Mal13 $\geq$ 2.39 $\cap$ Swi4 $\geq$ 2.72                        | 1.01E-4  |
| Mbp1 $\geq$ 2.38 $\cap$ Put3 $\geq$ 2.85                         | 1.06E-4  |
| Met4 $\geq$ 5.13                                                 | 4.86E-4  |
| Ino4 $\geq$ 2.39 $\cap$ Met4 $\geq$ 2.75                         | 4.86E-4  |
| Hir2 $\geq$ 3.54                                                 | 4.86E-4  |
| Put3 $\geq$ 2.85 $\cap$ Swi4 $\geq$ 2.72                         | 5.05E-4  |
| Met4 $\geq$ 5.13 $\cap$ Put3 $\geq$ 2.85                         | 5.05E-4  |
| Met4 $\geq$ 3.08 $\cap$ Swi4 $\geq$ 3.77                         | 5.05E-4  |
| Mbp1 $\geq$ 2.38 $\cap$ Met4 $\geq$ 5.08                         | 5.05E-4  |
| Ino4 $\geq$ 2.59 $\cap$ Mbp1 $\geq$ 2.38                         | 5.26E-4  |
| Ino2 $\geq$ 2.98 $\cap$ Put3 $\geq$ 3.58                         | 6.89E-4  |
| Gat1 $\geq$ 2.44 $\cap$ Put3 $\geq$ 3.58                         | 7.1E-4   |

| 98min                                                           | <i>p</i> |
|-----------------------------------------------------------------|----------|
| Swi4 $\geq$ 3.77                                                | 3.73E-26 |
| Swi4 $\geq$ 3.77 $\cap$ Swi6 $\geq$ 2.35                        | 8.95E-20 |
| Mbp1 $\geq$ 2.38 $\cap$ Swi4 $\geq$ 3.77                        | 2.63E-15 |
| Stb1 $\geq$ 2.43 $\cap$ Swi4 $\geq$ 3.77                        | 4.95E-15 |
| Met4 $\geq$ 3.19 $\cap$ Swi4 $\geq$ 3.77                        | 2.11E-10 |
| Fkh2 $\geq$ 4.07 $\cap$ Swi4 $\geq$ 3.77                        | 3.53E-8  |
| Put3 $\geq$ 2.73 $\cap$ Swi4 $\geq$ 3.77                        | 4.3E-7   |
| Ino4 $\geq$ 2.59 $\cap$ Swi4 $\geq$ 3.77                        | 5.08E-6  |
| Mal13 $\geq$ 3.38 $\cap$ Swi4 $\geq$ 3.77                       | 5.4E-6   |
| Hir1 $\geq$ 17.5                                                | 6.25E-5  |
| Ash1 $\geq$ 2.8 $\cap$ Swi4 $\geq$ 3.77 $\cap$ Swi6 $\geq$ 3.19 | 6.57E-5  |
| Fkh2 $\geq$ 4.51                                                | 5.59E-4  |
| Hsf1 $\geq$ 3.61 $\cap$ Swi4 $\geq$ 3.77                        | 5.87E-4  |
| Met4 $\geq$ 5.08                                                | 6.96E-4  |

| 105min                                                           | <i>p</i> |
|------------------------------------------------------------------|----------|
| Swi4 $\geq$ 2.47                                                 | 2.63E-15 |
| Mbp1 $\geq$ 2.38 $\cap$ Swi4 $\geq$ 3.77                         | 8.84E-15 |
| Fkh2 $\geq$ 3.96                                                 | 1.18E-14 |
| Swi4 $\geq$ 3.32 $\cap$ Swi6 $\geq$ 2.67                         | 4.65E-14 |
| Hsf1 $\geq$ 2.3 $\cap$ Mbp1 $\geq$ 2.38 $\cap$ Swi4 $\geq$ 2.47  | 5.35E-14 |
| Mbp1 $\geq$ 2.38                                                 | 1.07E-12 |
| Hsf1 $\geq$ 2.3 $\cap$ Swi4 $\geq$ 2.47                          | 1.33E-10 |
| Hsf1 $\geq$ 2.3 $\cap$ Mbp1 $\geq$ 2.36                          | 8.13E-10 |
| Mbp1 $\geq$ 2.36 $\cap$ Swi6 $\geq$ 2.67                         | 9.61E-9  |
| Ash1 $\geq$ 3.41 $\cap$ Swi4 $\geq$ 2.47                         | 1.9E-8   |
| Fkh2 $\geq$ 3.35 $\cap$ Swi4 $\geq$ 2.47                         | 2.75E-8  |
| Ndd1 $\geq$ 7.85                                                 | 3.89E-7  |
| Hir1 $\geq$ 3.96 $\cap$ Swi4 $\geq$ 2.47                         | 3.89E-7  |
| Hir2 $\geq$ 5.2                                                  | 4.05E-7  |
| Ash1 $\geq$ 3.41 $\cap$ Mbp1 $\geq$ 2.36                         | 8.74E-7  |
| Met4 $\geq$ 4.78 $\cap$ Swi4 $\geq$ 2.47                         | 4.98E-6  |
| Hir2 $\geq$ 3.0 $\cap$ Swi4 $\geq$ 2.47                          | 2.21E-5  |
| Hir1 $\geq$ 3.73                                                 | 2.21E-5  |
| Hir1 $\geq$ 2.86 $\cap$ Mbp1 $\geq$ 2.36                         | 2.3E-5   |
| Swi6 $\geq$ 7.45                                                 | 6.13E-5  |
| Fkh2 $\geq$ 2.58 $\cap$ Ndd1 $\geq$ 3.27                         | 1.09E-4  |
| Mcm1 $\geq$ 2.81                                                 | 1.14E-4  |
| Mal13 $\geq$ 2.66 $\cap$ Swi4 $\geq$ 2.47                        | 1.14E-4  |
| Ash1 $\geq$ 3.73 $\cap$ Swi4 $\geq$ 2.47 $\cap$ Swi6 $\geq$ 2.72 | 2.8E-4   |
| Fkh2 $\geq$ 2.94 $\cap$ Mcm1 $\geq$ 2.81                         | 5.48E-4  |
| Ecm22 $\geq$ 2.3 $\cap$ Mbp1 $\geq$ 2.36                         | 5.48E-4  |
| Phd1 $\geq$ 2.83 $\cap$ Swi4 $\geq$ 2.47                         | 7.03E-4  |
| Smp1 $\geq$ 2.3 $\cap$ Swi4 $\geq$ 5.6                           | 7.1E-4   |
| Rlm1 $\geq$ 3.38 $\cap$ Swi4 $\geq$ 2.47                         | 7.1E-4   |
| Gat1 $\geq$ 3.86 $\cap$ Ino2 $\geq$ 2.44                         | 7.1E-4   |

| 112min                                    | <i>p</i> |
|-------------------------------------------|----------|
| Ndd1 $\geq$ 4.79                          | 2.33E-21 |
| Fkh2 $\geq$ 4.73                          | 1.34E-19 |
| Swi4 $\geq$ 2.55                          | 5.69E-11 |
| Mcm1 $\geq$ 2.39 $\cap$ Ndd1 $\geq$ 3.22  | 2.3E-9   |
| Mbp1 $\geq$ 2.38 $\cap$ Swi4 $\geq$ 3.77  | 2.49E-9  |
| Fkh2 $\geq$ 4.07 $\cap$ Mcm1 $\geq$ 4.77  | 2.95E-8  |
| Hir2 $\geq$ 5.2                           | 3.22E-8  |
| Hir1 $\geq$ 3.73 $\cap$ Swi4 $\geq$ 2.55  | 4.13E-7  |
| Hir1 $\geq$ 3.73                          | 4.33E-6  |
| Hir1 $\geq$ 3.73 $\cap$ Hir2 $\geq$ 2.7   | 4.55E-6  |
| Hir2 $\geq$ 2.7 $\cap$ Swi4 $\geq$ 2.55   | 2.21E-5  |
| Met4 $\geq$ 4.14                          | 2.3E-5   |
| Hir2 $\geq$ 2.7 $\cap$ Mbp1 $\geq$ 2.36   | 2.3E-5   |
| Ash1 $\geq$ 3.51 $\cap$ Fkh2 $\geq$ 4.07  | 5.95E-5  |
| Mal13 $\geq$ 3.58 $\cap$ Swi4 $\geq$ 6.81 | 6.07E-5  |
| Ino4 $\geq$ 3.12 $\cap$ Put3 $\geq$ 2.73  | 1.09E-4  |
| Fkh2 $\geq$ 4.07 $\cap$ Swi4 $\geq$ 3.77  | 1.14E-4  |
| Ino4 $\geq$ 3.1                           | 1.41E-4  |
| Put3 $\geq$ 3.15                          | 5.48E-4  |
| Fkh2 $\geq$ 4.07 $\cap$ Hir1 $\geq$ 3.41  | 7.03E-4  |
| Fkh2 $\geq$ 4.07 $\cap$ Put3 $\geq$ 2.73  | 7.1E-4   |
| Hir2 $\geq$ 2.7 $\cap$ Ino2 $\geq$ 2.44   | 7.17E-4  |

| 119min                                                           | <i>p</i> |
|------------------------------------------------------------------|----------|
| Ndd1 $\geq$ 7.85                                                 | 1.6E-15  |
| Fkh2 $\geq$ 2.3 $\cap$ Ndd1 $\geq$ 2.63                          | 5.63E-11 |
| Mcm1 $\geq$ 2.39 $\cap$ Ndd1 $\geq$ 2.63                         | 3.96E-10 |
| Fkh2 $\geq$ 3.96                                                 | 4.42E-10 |
| Cup9 $\geq$ 2.3 $\cap$ Ndd1 $\geq$ 2.63                          | 1.01E-4  |
| Dot6 $\geq$ 2.33 $\cap$ Ndd1 $\geq$ 2.63                         | 5.05E-4  |
| Mcm1 $\geq$ 2.39 $\cap$ Ndd1 $\geq$ 2.63 $\cap$ Sok2 $\geq$ 2.85 | 6.96E-4  |
| Hir2 $\geq$ 2.7 $\cap$ Mbp1 $\geq$ 2.36                          | 6.96E-4  |
| Ndd1 $\geq$ 2.63 $\cap$ Sko1 $\geq$ 2.3                          | 7.03E-4  |
| Ndd1 $\geq$ 2.63 $\cap$ Sfl1 $\geq$ 2.58                         | 7.03E-4  |
| Ndd1 $\geq$ 2.63 $\cap$ Rlm1 $\geq$ 2.59                         | 7.03E-4  |
| Mcm1 $\geq$ 2.39 $\cap$ Sok2 $\geq$ 2.85                         | 7.03E-4  |
