# Supplementary material for: An ensemble learning approach to reverse-engineering transcriptional regulatory networks from time-series gene expression data
Source: PubMed Central journal article supplement (PMC2709269; doi:10.1186/1471-2164-10-s1-s8), 2009-07-07
Supplement: 1471-2164-10-S1-S8-S5.pdf [file 1471-2164-10-S1-S8-S5.pdf]

**Supplementary Table 3.** Regulatory rules learned from CDC15 data set.

| 30min                                    | <i>p</i> |
|------------------------------------------|----------|
| Swi4 $\geq$ 3.61 $\cap$ Swi6 $\geq$ 3.08 | 8.42E-12 |
| Swi4 $\geq$ 2.34                         | 4.93E-10 |
| Stb1 $\geq$ 3.91                         | 1.15E-9  |
| Stb1 $\geq$ 3.91 $\cap$ Swi6 $\geq$ 2.32 | 1.85E-9  |
| Stb1 $\geq$ 2.73 $\cap$ Swi4 $\geq$ 3.61 | 1.85E-9  |
| Mbp1 $\geq$ 2.85                         | 2.95E-9  |
| Swi6 $\geq$ 5.71                         | 1.57E-8  |
| Ace2 $\geq$ 17.83                        | 3.48E-7  |
| Mbp1 $\geq$ 3.12 $\cap$ Swi6 $\geq$ 2.56 | 6.54E-7  |
| Rlm1 $\geq$ 2.38                         | 7.09E-7  |
| Mbp1 $\geq$ 2.3 $\cap$ Swi4 $\geq$ 3.61  | 3.65E-6  |
| Fkh1 $\geq$ 3.51                         | 1.96E-5  |
| Rlm1 $\geq$ 2.3 $\cap$ Swi4 $\geq$ 3.61  | 5.83E-5  |
| Cin5 $\geq$ 4.34                         | 1.01E-4  |
| Cin5 $\geq$ 2.3 $\cap$ Mbp1 $\geq$ 2.85  | 1.01E-4  |
| Fkh1 $\geq$ 2.66 $\cap$ Rlm1 $\geq$ 2.3  | 1.06E-4  |
| Ace2 $\geq$ 4.42 $\cap$ Fkh1 $\geq$ 2.56 | 1.06E-4  |
| Cin5 $\geq$ 4.34 $\cap$ Yap6 $\geq$ 3.17 | 2.69E-4  |
| Ino4 $\geq$ 2.3 $\cap$ Swi4 $\geq$ 3.61  | 2.77E-4  |
| Cin5 $\geq$ 2.3 $\cap$ Rlm1 $\geq$ 2.38  | 5.05E-4  |
| Sfl1 $\geq$ 2.32 $\cap$ Stb1 $\geq$ 3.47 | 6.89E-4  |

  

| 50min                                     | <i>p</i> |
|-------------------------------------------|----------|
| Swi4 $\geq$ 3.77 $\cap$ Swi6 $\geq$ 3.08  | 6.66E-18 |
| Swi4 $\geq$ 6.73                          | 2.61E-15 |
| Swi6 $\geq$ 2.56                          | 9.67E-15 |
| Mbp1 $\geq$ 2.3                           | 6.3E-12  |
| Mbp1 $\geq$ 2.72 $\cap$ Swi6 $\geq$ 2.56  | 9.19E-11 |
| Mbp1 $\geq$ 2.3 $\cap$ Swi4 $\geq$ 3.77   | 1.13E-10 |
| Mal13 $\geq$ 2.39 $\cap$ Swi4 $\geq$ 3.77 | 1.53E-10 |
| Stb1 $\geq$ 2.43 $\cap$ Swi6 $\geq$ 2.32  | 6.59E-10 |
| Ash1 $\geq$ 2.73 $\cap$ Swi6 $\geq$ 2.56  | 2.25E-8  |
| Stb1 $\geq$ 2.43 $\cap$ Swi4 $\geq$ 3.77  | 2.44E-8  |
| Fkh2 $\geq$ 2.4 $\cap$ Swi6 $\geq$ 2.32   | 1.5E-7   |
| Fkh2 $\geq$ 4.79 $\cap$ Mbp1 $\geq$ 2.38  | 5.13E-6  |
| Fkh1 $\geq$ 3.65 $\cap$ Fkh2 $\geq$ 4.79  | 5.89E-5  |
| Fkh2 $\geq$ 7.49                          | 6.07E-5  |
| Hir2 $\geq$ 5.2                           | 2.72E-4  |
| Hir1 $\geq$ 3.65                          | 5.11E-4  |
| Fkh1 $\geq$ 2.66 $\cap$ Swi6 $\geq$ 2.56  | 5.31E-4  |

| 70min                                                            | <i>p</i> |
|------------------------------------------------------------------|----------|
| Swi4 $\geq$ 2.33                                                 | 3.54E-13 |
| Ash1 $\geq$ 2.8 $\cap$ Swi6 $\geq$ 2.32                          | 1.63E-11 |
| Swi6 $\geq$ 2.32                                                 | 5.51E-10 |
| Mal13 $\geq$ 2.39 $\cap$ Swi4 $\geq$ 3.73                        | 2.62E-9  |
| Swi4 $\geq$ 2.33 $\cap$ Swi6 $\geq$ 2.35                         | 6.64E-9  |
| Ino4 $\geq$ 3.1                                                  | 1.3E-8   |
| Hsf1 $\geq$ 3.32 $\cap$ Swi4 $\geq$ 3.73                         | 2.49E-8  |
| Ash1 $\geq$ 2.83 $\cap$ Swi4 $\geq$ 5.12                         | 3.42E-8  |
| Mbp1 $\geq$ 2.3 $\cap$ Swi4 $\geq$ 2.33                          | 3.64E-8  |
| Ino4 $\geq$ 2.3 $\cap$ Swi4 $\geq$ 2.33                          | 1.93E-7  |
| Ash1 $\geq$ 2.8 $\cap$ Mal13 $\geq$ 2.39 $\cap$ Swi4 $\geq$ 2.33 | 4.3E-7   |
| Ash1 $\geq$ 2.8 $\cap$ Mbp1 $\geq$ 2.81                          | 9.47E-7  |
| Ino4 $\geq$ 2.39 $\cap$ Met4 $\geq$ 2.7                          | 9.96E-7  |
| Fkh2 $\geq$ 2.33 $\cap$ Swi4 $\geq$ 2.33                         | 5.08E-6  |
| Hir2 $\geq$ 3.1 $\cap$ Swi4 $\geq$ 2.33                          | 5.29E-6  |
| Met4 $\geq$ 5.08 $\cap$ Swi4 $\geq$ 2.33                         | 5.4E-6   |
| Hir2 $\geq$ 3.1 $\cap$ Met4 $\geq$ 5.08                          | 5.45E-6  |
| Gat1 $\geq$ 2.41 $\cap$ Met4 $\geq$ 2.7                          | 1.13E-5  |
| Met4 $\geq$ 2.7                                                  | 2.37E-5  |
| Gat1 $\geq$ 2.4 $\cap$ Ino4 $\geq$ 3.35                          | 3.01E-5  |
| Skol $\geq$ 2.42 $\cap$ Swi4 $\geq$ 3.73                         | 6.19E-5  |
| Mth1 $\geq$ 2.3 $\cap$ Swi4 $\geq$ 2.33 $\cap$ Swi6 $\geq$ 3.19  | 6.38E-5  |
| Ash1 $\geq$ 2.8 $\cap$ Swi4 $\geq$ 2.33 $\cap$ Swi6 $\geq$ 3.08  | 6.38E-5  |
| Hir2 $\geq$ 3.06                                                 | 1.16E-4  |
| Gat1 $\geq$ 2.4 $\cap$ Msn2 $\geq$ 2.42                          | 2.92E-4  |
| Ash1 $\geq$ 2.8 $\cap$ Fkh2 $\geq$ 2.8 $\cap$ Swi4 $\geq$ 2.33   | 2.92E-4  |
| Msn2 $\geq$ 2.42 $\cap$ Msn4 $\geq$ 2.3                          | 5.7E-4   |
| Gat1 $\geq$ 2.4 $\cap$ Ino2 $\geq$ 2.45                          | 5.7E-4   |
| Fkh2 $\geq$ 2.33 $\cap$ Mbp1 $\geq$ 3.3                          | 5.7E-4   |
| Gat1 $\geq$ 2.4 $\cap$ Ino2 $\geq$ 2.8 $\cap$ Ino4 $\geq$ 3.35   | 8.17E-4  |
| Ino4 $\geq$ 2.39 $\cap$ Swi6 $\geq$ 2.32                         | 8.42E-4  |

| 80min                                           | <i>p</i> |
|-------------------------------------------------|----------|
| Swi4 $\geq$ 4.61                                | 1.92E-13 |
| Hsf1 $\geq$ 3.19 $\cap$ Swi4 $\geq$ 2.33        | 3.33E-9  |
| Ash1 $\geq$ 3.04                                | 3.53E-8  |
| Fkh2 $\geq$ 4.07                                | 1.87E-7  |
| Swi4 $\geq$ 4.61 $\cap$ Swi6 $\geq$ 3.08        | 2.41E-7  |
| Fkh2 $\geq$ 4.07 $\cap$ Swi4 $\geq$ 4.61        | 2.48E-7  |
| Grf10(pho2) $\geq$ 2.44 $\cap$ Swi4 $\geq$ 4.61 | 5.08E-6  |
| Mal13 $\geq$ 3.54 $\cap$ Swi4 $\geq$ 4.61       | 5.13E-6  |
| Mal13 $\geq$ 3.17                               | 6.07E-5  |
| Ino4 $\geq$ 3.08 $\cap$ Swi4 $\geq$ 2.33        | 1.17E-4  |
| Met4 $\geq$ 2.72                                | 1.2E-4   |
| Met4 $\geq$ 3.1 $\cap$ Rgm1 $\geq$ 2.3          | 2.8E-4   |
| Ash1 $\geq$ 2.83 $\cap$ Met4 $\geq$ 2.33        | 5.42E-4  |
| Yap6 $\geq$ 3.0                                 | 5.53E-4  |
| Mal13 $\geq$ 2.55 $\cap$ Met4 $\geq$ 2.33       | 5.53E-4  |
| Gat1 $\geq$ 2.5 $\cap$ Met4 $\geq$ 2.3          | 5.53E-4  |
| Gat1 $\geq$ 2.39 $\cap$ Msn4 $\geq$ 2.3         | 5.53E-4  |
| Fkh1 $\geq$ 3.41                                | 5.53E-4  |
| Cin5 $\geq$ 2.63 $\cap$ Met4 $\geq$ 2.3         | 6.56E-4  |

| 90min                                                              | <i>p</i> |
|--------------------------------------------------------------------|----------|
| Swi4 $\geq$ 2.7                                                    | 1.32E-8  |
| Ash1 $\geq$ 2.63                                                   | 1.59E-8  |
| Hsf1 $\geq$ 3.19 $\cap$ Swi4 $\geq$ 4.61                           | 3.53E-8  |
| Fkh2 $\geq$ 3.24                                                   | 3.56E-8  |
| Fkh2 $\geq$ 4.07 $\cap$ Swi4 $\geq$ 2.33                           | 2.71E-7  |
| Ndd1 $\geq$ 4.14                                                   | 3.55E-7  |
| Ash1 $\geq$ 2.63 $\cap$ Fkh2 $\geq$ 3.24                           | 4.38E-7  |
| Ino4 $\geq$ 2.3 $\cap$ Swi4 $\geq$ 2.7                             | 9.47E-7  |
| Ash1 $\geq$ 2.63 $\cap$ Swi4 $\geq$ 2.7                            | 9.47E-7  |
| Cin5 $\geq$ 2.3                                                    | 1.59E-6  |
| Ash1 $\geq$ 2.63 $\cap$ Swi6 $\geq$ 2.35                           | 4.64E-6  |
| Ash1 $\geq$ 2.83 $\cap$ Mal13 $\geq$ 3.17                          | 5.29E-6  |
| Fkh2 $\geq$ 2.58 $\cap$ Hsf1 $\geq$ 3.19 $\cap$ Swi4 $\geq$ 4.66   | 5.34E-6  |
| Mal13 $\geq$ 2.39                                                  | 2.21E-5  |
| Mth1 $\geq$ 2.92 $\cap$ Swi4 $\geq$ 4.61                           | 2.98E-5  |
| Mal13 $\geq$ 2.39 $\cap$ Swi4 $\geq$ 2.7                           | 6.31E-5  |
| Fkh2 $\geq$ 4.07 $\cap$ Ste12 $\geq$ 2.65                          | 6.31E-5  |
| Grf10(pho2) $\geq$ 3.73 $\cap$ Swi4 $\geq$ 4.61                    | 6.38E-5  |
| Dal82 $\geq$ 2.59 $\cap$ Ecm22 $\geq$ 2.47 $\cap$ Mth1 $\geq$ 2.35 | 6.38E-5  |
| Rgm1 $\geq$ 2.3 $\cap$ Swi4 $\geq$ 2.33                            | 1.14E-4  |
| Cin5 $\geq$ 2.78 $\cap$ Swi4 $\geq$ 2.33                           | 1.14E-4  |
| Ash1 $\geq$ 2.75 $\cap$ Ino4 $\geq$ 2.3                            | 1.19E-4  |
| Ecm22 $\geq$ 2.4 $\cap$ Swi4 $\geq$ 2.33                           | 2.86E-4  |
| Cin5 $\geq$ 2.63 $\cap$ Met4 $\geq$ 2.3                            | 5.64E-4  |
| Ash1 $\geq$ 2.83 $\cap$ Ecm22 $\geq$ 2.4                           | 5.64E-4  |
| Swi4 $\geq$ 2.33 $\cap$ Swi6 $\geq$ 2.83                           | 5.81E-4  |
| Dal82 $\geq$ 2.54                                                  | 5.93E-4  |
| Mcm1 $\geq$ 4.85 $\cap$ Ndd1 $\geq$ 4.14                           | 7.17E-4  |
| Ixr1 $\geq$ 2.65 $\cap$ Mth1 $\geq$ 2.3                            | 7.32E-4  |
| Fkh1 $\geq$ 8.25 $\cap$ Fkh2 $\geq$ 4.07                           | 7.32E-4  |
| Dal82 $\geq$ 2.59 $\cap$ Mss11 $\geq$ 3.3                          | 7.32E-4  |
| Cin5 $\geq$ 2.63 $\cap$ Hsf1 $\geq$ 3.65                           | 7.32E-4  |
| Ash1 $\geq$ 2.75 $\cap$ Cbf1 $\geq$ 5.47                           | 7.32E-4  |
| Fkh2 $\geq$ 3.24 $\cap$ Mcm1 $\geq$ 8.47                           | 7.39E-4  |
| Cin5 $\geq$ 2.67 $\cap$ Mal13 $\geq$ 3.17                          | 7.39E-4  |
| Cha4 $\geq$ 3.17 $\cap$ Fkh2 $\geq$ 2.58                           | 7.39E-4  |
| Hir2 $\geq$ 2.31 $\cap$ Yap6 $\geq$ 3.0                            | 7.47E-4  |
| Fkh1 $\geq$ 8.25                                                   | 7.47E-4  |

| 100min                                                           | <i>p</i> |
|------------------------------------------------------------------|----------|
| Swi4 $\geq$ 4.91                                                 | 4.03E-9  |
| Fkh2 $\geq$ 4.07                                                 | 8.28E-9  |
| Ndd1 $\geq$ 3.24                                                 | 1.81E-8  |
| Fkh2 $\geq$ 4.07 $\cap$ Swi4 $\geq$ 2.73                         | 2.46E-8  |
| Fkh2 $\geq$ 5.17 $\cap$ Ndd1 $\geq$ 4.34                         | 3.64E-8  |
| Ash1 $\geq$ 2.44 $\cap$ Swi4 $\geq$ 2.73                         | 2.18E-7  |
| Rap1 $\geq$ 2.51 $\cap$ Swi4 $\geq$ 4.91                         | 4.43E-7  |
| Ste12 $\geq$ 2.53 $\cap$ Swi4 $\geq$ 4.91                        | 4.61E-7  |
| Ino4 $\geq$ 2.47 $\cap$ Swi4 $\geq$ 4.91                         | 1.13E-6  |
| Ndd1 $\geq$ 3.24 $\cap$ Swi6 $\geq$ 3.19                         | 5.29E-6  |
| Ash1 $\geq$ 2.63 $\cap$ Swi6 $\geq$ 2.3                          | 5.34E-6  |
| Ash1 $\geq$ 2.54 $\cap$ Ino4 $\geq$ 2.47 $\cap$ Swi4 $\geq$ 4.91 | 6.38E-5  |
| Met4 $\geq$ 2.32 $\cap$ Rgm1 $\geq$ 2.3                          | 1.22E-4  |
| Fkh2 $\geq$ 3.24 $\cap$ Rap1 $\geq$ 2.47                         | 1.22E-4  |
| Cin5 $\geq$ 2.3 $\cap$ Swi4 $\geq$ 2.73                          | 1.22E-4  |
| Sum1 $\geq$ 2.3                                                  | 1.42E-4  |
| Hsf1 $\geq$ 2.92 $\cap$ Swi4 $\geq$ 5.12                         | 2.92E-4  |
| Fkh2 $\geq$ 4.07 $\cap$ Mcm1 $\geq$ 4.61                         | 2.92E-4  |
| Cin5 $\geq$ 2.67                                                 | 5E-4     |
| Mcm1 $\geq$ 4.61                                                 | 5.7E-4   |
| Hap3 $\geq$ 2.44 $\cap$ Sum1 $\geq$ 2.38                         | 5.7E-4   |
| Fkh2 $\geq$ 3.24 $\cap$ Rgm1 $\geq$ 2.33                         | 5.7E-4   |
| Ash1 $\geq$ 4.07                                                 | 5.7E-4   |
| Yap6 $\geq$ 3.0                                                  | 5.81E-4  |
| Fkh1 $\geq$ 3.27 $\cap$ Fkh2 $\geq$ 3.24                         | 5.81E-4  |
| Cin5 $\geq$ 2.76 $\cap$ Ndd1 $\geq$ 2.53                         | 5.81E-4  |
| Mcm1 $\geq$ 4.61 $\cap$ Ndd1 $\geq$ 2.53                         | 7.17E-4  |
| Rim101 $\geq$ 2.3 $\cap$ Sum1 $\geq$ 2.3                         | 8.33E-4  |

| 110min                                    | <i>p</i> |
|-------------------------------------------|----------|
| Ndd1 $\geq$ 3.65                          | 2.44E-8  |
| Mcm1 $\geq$ 4.61 $\cap$ Ndd1 $\geq$ 4.14  | 3.77E-7  |
| Ash1 $\geq$ 2.63 $\cap$ Ndd1 $\geq$ 3.65  | 3.89E-7  |
| Ash1 $\geq$ 2.63                          | 1.15E-6  |
| Fkh2 $\geq$ 2.6                           | 1.4E-6   |
| Cin5 $\geq$ 2.3                           | 1.47E-6  |
| Fkh2 $\geq$ 2.6 $\cap$ Ndd1 $\geq$ 2.53   | 4.2E-6   |
| Phd1 $\geq$ 2.6                           | 4.46E-6  |
| Swi4 $\geq$ 2.33                          | 7.07E-6  |
| Mcm1 $\geq$ 4.61                          | 2.19E-5  |
| Hsf1 $\geq$ 2.67 $\cap$ Swi4 $\geq$ 2.7   | 9.05E-5  |
| Cin5 $\geq$ 2.67 $\cap$ Met4 $\geq$ 2.3   | 1.11E-4  |
| Ash1 $\geq$ 2.83 $\cap$ Met4 $\geq$ 2.33  | 1.11E-4  |
| Met4 $\geq$ 2.3 $\cap$ Rgm1 $\geq$ 2.3    | 1.15E-4  |
| Met4 $\geq$ 2.33 $\cap$ Ndd1 $\geq$ 4.14  | 2.77E-4  |
| Ino4 $\geq$ 2.47 $\cap$ Swi4 $\geq$ 2.7   | 2.86E-4  |
| Yap6 $\geq$ 3.0                           | 5.37E-4  |
| Nrg1 $\geq$ 2.48                          | 6.43E-4  |
| Aro80 $\geq$ 2.94 $\cap$ Met4 $\geq$ 2.96 | 7.17E-4  |
| Cin5 $\geq$ 4.65 $\cap$ Ndd1 $\geq$ 3.65  | 7.25E-4  |
| Cin5 $\geq$ 3.12 $\cap$ Hsf1 $\geq$ 3.65  | 7.25E-4  |
| Cin5 $\geq$ 2.67 $\cap$ Rgm1 $\geq$ 2.3   | 7.25E-4  |
| Dal82 $\geq$ 2.54 $\cap$ Ndd1 $\geq$ 3.65 | 7.54E-4  |

| 120min                                                           | <i>p</i> |
|------------------------------------------------------------------|----------|
| Ndd1 $\geq$ 3.54 $\cap$ Swi4 $\geq$ 2.33                         | 1.35E-9  |
| Fkh2 $\geq$ 4.72 $\cap$ Swi4 $\geq$ 2.73                         | 3.47E-9  |
| Ndd1 $\geq$ 11.18                                                | 3.5E-9   |
| Swi4 $\geq$ 2.33                                                 | 6.07E-9  |
| Ash1 $\geq$ 4.2                                                  | 4.14E-8  |
| Fkh2 $\geq$ 4.72                                                 | 5.87E-8  |
| Cup9 $\geq$ 2.3 $\cap$ Swi4 $\geq$ 2.33                          | 5.04E-7  |
| Fkh2 $\geq$ 4.72 $\cap$ Ndd1 $\geq$ 2.53                         | 1.33E-6  |
| Ash1 $\geq$ 2.59 $\cap$ Phd1 $\geq$ 2.67                         | 1.33E-6  |
| Ino4 $\geq$ 2.47 $\cap$ Swi4 $\geq$ 2.33                         | 1.37E-6  |
| Met4 $\geq$ 3.51 $\cap$ Skn7 $\geq$ 3.96 $\cap$ Swi4 $\geq$ 2.33 | 5.73E-6  |
| Hir2 $\geq$ 2.65 $\cap$ Swi4 $\geq$ 2.33                         | 5.73E-6  |
| Rap1 $\geq$ 3.3 $\cap$ Swi4 $\geq$ 2.53                          | 6.39E-6  |
| Cin5 $\geq$ 2.78 $\cap$ Swi4 $\geq$ 2.53                         | 2.95E-5  |
| Ace2 $\geq$ 2.43 $\cap$ Swi4 $\geq$ 2.33                         | 2.95E-5  |
| Sum1 $\geq$ 2.38                                                 | 4.63E-5  |
| Cin5 $\geq$ 2.78 $\cap$ Cup9 $\geq$ 2.3 $\cap$ Swi4 $\geq$ 2.33  | 6.44E-5  |
| Ash1 $\geq$ 4.2 $\cap$ Ecm22 $\geq$ 2.4                          | 6.44E-5  |
| Phd1 $\geq$ 5.08                                                 | 1.32E-4  |
| Hap3 $\geq$ 2.31 $\cap$ Sum1 $\geq$ 2.81                         | 1.32E-4  |
| Dot6 $\geq$ 2.3 $\cap$ Sum1 $\geq$ 2.81                          | 1.32E-4  |
| Ash1 $\geq$ 3.38 $\cap$ Swi4 $\geq$ 2.33                         | 1.32E-4  |
| Met4 $\geq$ 3.51 $\cap$ Swi4 $\geq$ 2.33                         | 1.35E-4  |
| Hap3 $\geq$ 2.31 $\cap$ Rtg3 $\geq$ 2.3                          | 1.35E-4  |
| Yap6 $\geq$ 3.0                                                  | 1.88E-4  |
| Phd1 $\geq$ 5.4 $\cap$ Swi4 $\geq$ 2.33                          | 3.01E-4  |
| Rtg3 $\geq$ 2.3 $\cap$ Sum1 $\geq$ 2.38                          | 5.99E-4  |
| Rim101 $\geq$ 2.53 $\cap$ Rtg3 $\geq$ 3.61                       | 5.99E-4  |
| Rim101 $\geq$ 2.43 $\cap$ Sum1 $\geq$ 2.43                       | 5.99E-4  |
| Fkh1 $\geq$ 4.93                                                 | 5.99E-4  |
| Ecm22 $\geq$ 2.34 $\cap$ Swi4 $\geq$ 2.33                        | 5.99E-4  |
| Swi4 $\geq$ 2.33 $\cap$ Swi6 $\geq$ 2.83                         | 6.11E-4  |
| Fkh1 $\geq$ 3.22 $\cap$ Swi4 $\geq$ 2.53                         | 6.11E-4  |
| Sok2 $\geq$ 4.34                                                 | 7.77E-4  |

| 130min                                                         | <i>p</i> |
|----------------------------------------------------------------|----------|
| Fkh2 $\geq$ 2.4                                                | 3.84E-6  |
| Cin5 $\geq$ 2.56 $\cap$ Met4 $\geq$ 2.44                       | 4.88E-6  |
| Met4 $\geq$ 2.65                                               | 5.79E-6  |
| Cin5 $\geq$ 2.56                                               | 5.79E-6  |
| Swi4 $\geq$ 2.7                                                | 5.9E-6   |
| Yap6 $\geq$ 3.3                                                | 2.04E-5  |
| Met4 $\geq$ 2.3 $\cap$ Rgm1 $\geq$ 2.3                         | 2.14E-5  |
| Ino4 $\geq$ 2.58 $\cap$ Swi4 $\geq$ 2.7                        | 2.65E-5  |
| Ace2 $\geq$ 19.26                                              | 5.77E-5  |
| Swi4 $\geq$ 2.7 $\cap$ Swi6 $\geq$ 2.83                        | 5.89E-5  |
| Rgm1 $\geq$ 2.3 $\cap$ Swi4 $\geq$ 2.7                         | 6.01E-5  |
| Hsf1 $\geq$ 2.4 $\cap$ Swi4 $\geq$ 2.7                         | 1.04E-4  |
| Rlm1 $\geq$ 2.41                                               | 1.28E-4  |
| Cin5 $\geq$ 3.12 $\cap$ Hsf1 $\geq$ 2.4 $\cap$ Swi4 $\geq$ 2.7 | 2.75E-4  |
| Swi6 $\geq$ 2.32                                               | 3.71E-4  |
| Ash1 $\geq$ 2.72                                               | 3.71E-4  |
| Fkh2 $\geq$ 2.94 $\cap$ Met4 $\geq$ 2.44                       | 4.95E-4  |
| Ash1 $\geq$ 2.72 $\cap$ Met4 $\geq$ 2.65                       | 5.16E-4  |
| Stb1 $\geq$ 2.73                                               | 5.37E-4  |
| Aro80 $\geq$ 2.94 $\cap$ Met4 $\geq$ 2.75                      | 7.03E-4  |
| Rgm1 $\geq$ 2.51 $\cap$ Swi6 $\geq$ 2.32                       | 7.1E-4   |
| Cin5 $\geq$ 2.67 $\cap$ Rgm1 $\geq$ 2.3                        | 7.1E-4   |
| Cin5 $\geq$ 2.56 $\cap$ Fkh1 $\geq$ 3.65                       | 7.1E-4   |

| 140min                                                          | <i>p</i> |
|-----------------------------------------------------------------|----------|
| Swi4 $\geq$ 2.7                                                 | 2.93E-13 |
| Swi4 $\geq$ 3.61 $\cap$ Swi6 $\geq$ 2.35                        | 1.03E-10 |
| Swi6 $\geq$ 2.32                                                | 1.17E-9  |
| Stb1 $\geq$ 2.73 $\cap$ Swi4 $\geq$ 2.7                         | 1.94E-9  |
| Stb1 $\geq$ 2.96                                                | 1.21E-7  |
| Fkh2 $\geq$ 4.07                                                | 6.88E-7  |
| Mbp1 $\geq$ 2.3 $\cap$ Swi4 $\geq$ 2.7                          | 3.73E-6  |
| Hsf1 $\geq$ 2.4 $\cap$ Swi4 $\geq$ 2.7                          | 4.46E-6  |
| Ace2 $\geq$ 17.83                                               | 4.74E-6  |
| Cin5 $\geq$ 3.12 $\cap$ Swi4 $\geq$ 2.7                         | 4.79E-6  |
| Rlm1 $\geq$ 2.3 $\cap$ Swi4 $\geq$ 2.7                          | 4.88E-6  |
| Ste12 $\geq$ 2.44 $\cap$ Swi4 $\geq$ 2.7                        | 6.13E-5  |
| Yap6 $\geq$ 3.38                                                | 1.05E-4  |
| Fkh1 $\geq$ 2.66 $\cap$ Rlm1 $\geq$ 2.58                        | 1.05E-4  |
| Cin5 $\geq$ 4.34                                                | 1.11E-4  |
| Rlm1 $\geq$ 2.59                                                | 1.25E-4  |
| Cin5 $\geq$ 4.34 $\cap$ Yap6 $\geq$ 3.65                        | 2.77E-4  |
| Ash1 $\geq$ 2.72 $\cap$ Swi4 $\geq$ 2.7                         | 5.21E-4  |
| Cin5 $\geq$ 2.56 $\cap$ Met4 $\geq$ 2.44                        | 5.37E-4  |
| Ace2 $\geq$ 2.36 $\cap$ Rlm1 $\geq$ 2.59                        | 5.37E-4  |
| Ace2 $\geq$ 2.36 $\cap$ Fkh2 $\geq$ 2.94                        | 5.37E-4  |
| Rlm1 $\geq$ 2.59 $\cap$ Sfl1 $\geq$ 3.35                        | 6.89E-4  |
| Ino4 $\geq$ 3.1 $\cap$ Ste12 $\geq$ 2.44 $\cap$ Swi4 $\geq$ 2.7 | 6.89E-4  |
| Rox1 $\geq$ 2.6 $\cap$ Swi4 $\geq$ 2.7                          | 6.96E-4  |
| Sfl1 $\geq$ 2.32 $\cap$ Stb1 $\geq$ 3.47                        | 7.03E-4  |
| Rap1 $\geq$ 2.51 $\cap$ Swi4 $\geq$ 4.42                        | 7.03E-4  |

| 150min                                                            | <i>p</i> |
|-------------------------------------------------------------------|----------|
| Swi4 $\geq$ 4.34 $\cap$ Swi6 $\geq$ 3.24                          | 5.78E-17 |
| Swi4 $\geq$ 4.34                                                  | 3.96E-14 |
| Stb1 $\geq$ 2.43 $\cap$ Swi4 $\geq$ 4.34                          | 1.99E-11 |
| Met4 $\geq$ 2.92                                                  | 2.66E-7  |
| Hsf1 $\geq$ 2.86 $\cap$ Swi4 $\geq$ 4.34                          | 2.66E-7  |
| Mal13 $\geq$ 2.39 $\cap$ Swi4 $\geq$ 4.34                         | 1.24E-6  |
| Fkh2 $\geq$ 5.74 $\cap$ Mbp1 $\geq$ 2.85                          | 5.67E-6  |
| Mal13 $\geq$ 2.36 $\cap$ Met4 $\geq$ 3.1                          | 2.73E-5  |
| Cin5 $\geq$ 2.56 $\cap$ Met4 $\geq$ 2.44                          | 2.73E-5  |
| Cin5 $\geq$ 5.43                                                  | 2.81E-5  |
| Ash1 $\geq$ 2.83 $\cap$ Met4 $\geq$ 2.65                          | 2.81E-5  |
| Cin5 $\geq$ 3.22 $\cap$ Yap6 $\geq$ 3.0                           | 2.89E-5  |
| Hsf1 $\geq$ 3.32 $\cap$ Mal13 $\geq$ 2.43 $\cap$ Swi4 $\geq$ 4.34 | 6.44E-5  |
| Ace2 $\geq$ 17.83                                                 | 6.57E-5  |
| Fkh2 $\geq$ 5.74                                                  | 1.28E-4  |
| Fkh2 $\geq$ 2.4 $\cap$ Swi4 $\geq$ 4.34                           | 1.31E-4  |
| Cin5 $\geq$ 2.56 $\cap$ Fkh1 $\geq$ 2.66                          | 1.31E-4  |
| Yap6 $\geq$ 3.0                                                   | 1.48E-4  |
| Ste12 $\geq$ 2.44 $\cap$ Swi4 $\geq$ 4.34                         | 3.13E-4  |
| Nrg1 $\geq$ 2.5 $\cap$ Yap6 $\geq$ 3.0                            | 5.99E-4  |
| Cin5 $\geq$ 2.56 $\cap$ Mbp1 $\geq$ 2.85                          | 5.99E-4  |
| Cbf1 $\geq$ 4.74                                                  | 5.99E-4  |
| Mbp1 $\geq$ 2.85 $\cap$ Met4 $\geq$ 2.44                          | 6.11E-4  |
| Fkh2 $\geq$ 2.94 $\cap$ Met4 $\geq$ 2.44                          | 6.11E-4  |
| Ash1 $\geq$ 3.38                                                  | 6.76E-4  |
| Phd1 $\geq$ 6.44                                                  | 8.5E-4   |
| Met4 $\geq$ 2.65 $\cap$ Sko1 $\geq$ 2.3                           | 8.59E-4  |

| 160min                                    | <i>p</i> |
|-------------------------------------------|----------|
| Swi4 $\geq$ 4.66 $\cap$ Swi6 $\geq$ 2.35  | 2.33E-17 |
| Swi4 $\geq$ 4.66                          | 3.14E-17 |
| Swi6 $\geq$ 2.56                          | 1.29E-10 |
| Mal13 $\geq$ 2.43 $\cap$ Swi4 $\geq$ 4.66 | 2.01E-10 |
| Stb1 $\geq$ 2.73 $\cap$ Swi4 $\geq$ 4.66  | 2.05E-10 |
| Ino4 $\geq$ 2.63 $\cap$ Swi4 $\geq$ 4.66  | 2.13E-10 |
| Fkh2 $\geq$ 5.91                          | 5.18E-6  |
| Fkh2 $\geq$ 4.07 $\cap$ Swi4 $\geq$ 4.66  | 6.07E-5  |
| Ace2 $\geq$ 17.83                         | 6.07E-5  |
| Rgm1 $\geq$ 2.38 $\cap$ Swi4 $\geq$ 4.66  | 6.13E-5  |
| Hir2 $\geq$ 2.72                          | 1.17E-4  |
| Fkh2 $\geq$ 5.91 $\cap$ Mbp1 $\geq$ 2.85  | 1.17E-4  |
| Fkh1 $\geq$ 3.65                          | 5.53E-4  |
| Fkh1 $\geq$ 3.27 $\cap$ Mbp1 $\geq$ 2.85  | 5.53E-4  |
| Fkh1 $\geq$ 2.3 $\cap$ Rlm1 $\geq$ 2.59   | 5.53E-4  |
| Fkh1 $\geq$ 3.27 $\cap$ Fkh2 $\geq$ 5.91  | 5.7E-4   |
| Rlm1 $\geq$ 2.59                          | 5.93E-4  |
| Hsf1 $\geq$ 3.44 $\cap$ Swi4 $\geq$ 4.66  | 8.01E-4  |

| 170min                                    | <i>p</i> |
|-------------------------------------------|----------|
| Swi4 $\geq$ 4.42                          | 3.79E-20 |
| Swi4 $\geq$ 4.42 $\cap$ Swi6 $\geq$ 3.08  | 3.33E-17 |
| Swi6 $\geq$ 3.24                          | 6.78E-13 |
| Stb1 $\geq$ 2.43 $\cap$ Swi4 $\geq$ 5.12  | 1.39E-12 |
| Ash1 $\geq$ 2.73 $\cap$ Swi4 $\geq$ 2.54  | 1.47E-9  |
| Mbp1 $\geq$ 2.72 $\cap$ Swi4 $\geq$ 2.34  | 1.57E-9  |
| Hsf1 $\geq$ 2.67 $\cap$ Swi4 $\geq$ 2.34  | 7.95E-9  |
| Ste12 $\geq$ 2.32 $\cap$ Swi4 $\geq$ 3.32 | 3.71E-8  |
| Fkh2 $\geq$ 4.98 $\cap$ Mbp1 $\geq$ 2.38  | 2.88E-7  |
| Met4 $\geq$ 2.65 $\cap$ Swi4 $\geq$ 2.34  | 1.13E-6  |
| Mal13 $\geq$ 2.43 $\cap$ Swi4 $\geq$ 3.32 | 1.19E-6  |
| Fkh1 $\geq$ 2.66 $\cap$ Mbp1 $\geq$ 3.73  | 3.02E-6  |
| Fkh2 $\geq$ 4.98                          | 3.54E-6  |
| Hir2 $\geq$ 2.72 $\cap$ Met4 $\geq$ 5.13  | 5.56E-6  |
| Met4 $\geq$ 5.08                          | 5.62E-6  |
| Hir2 $\geq$ 2.51 $\cap$ Swi4 $\geq$ 2.34  | 2.7E-5   |
| Ino4 $\geq$ 2.49 $\cap$ Swi4 $\geq$ 2.34  | 3.99E-5  |
| Put3 $\geq$ 2.45 $\cap$ Swi4 $\geq$ 3.32  | 6.44E-5  |
| Gat1 $\geq$ 2.5 $\cap$ Met4 $\geq$ 5.3    | 6.44E-5  |
| Mbp1 $\geq$ 4.34                          | 1.25E-4  |
| Fkh1 $\geq$ 2.66 $\cap$ Swi4 $\geq$ 2.34  | 1.25E-4  |
| Hir2 $\geq$ 2.72                          | 1.28E-4  |
| Hir1 $\geq$ 2.39 $\cap$ Swi4 $\geq$ 2.34  | 1.28E-4  |
| Fkh1 $\geq$ 3.51 $\cap$ Fkh2 $\geq$ 2.94  | 1.28E-4  |
| Hir2 $\geq$ 2.31 $\cap$ Ino4 $\geq$ 2.49  | 5.81E-4  |
| Fkh2 $\geq$ 3.35 $\cap$ Swi4 $\geq$ 2.34  | 5.93E-4  |
| Fkh1 $\geq$ 2.86 $\cap$ Swi6 $\geq$ 3.08  | 5.93E-4  |
| Ash1 $\geq$ 3.96                          | 5.93E-4  |
| Ino4 $\geq$ 2.39 $\cap$ Met4 $\geq$ 2.65  | 7.17E-4  |

| 180min                                                          | <i>p</i> |
|-----------------------------------------------------------------|----------|
| Swi4 $\geq$ 4.66 $\cap$ Swi6 $\geq$ 2.35                        | 1.11E-13 |
| Swi4 $\geq$ 4.66                                                | 2.61E-12 |
| Swi6 $\geq$ 2.81                                                | 4.82E-9  |
| Ash1 $\geq$ 2.8 $\cap$ Swi6 $\geq$ 2.35                         | 4.35E-8  |
| Ste12 $\geq$ 2.32 $\cap$ Swi4 $\geq$ 4.66                       | 4.05E-7  |
| Stb1 $\geq$ 2.43 $\cap$ Swi4 $\geq$ 4.34                        | 4.13E-7  |
| Mbp1 $\geq$ 3.15 $\cap$ Swi6 $\geq$ 2.35                        | 1.07E-6  |
| Mbp1 $\geq$ 2.72 $\cap$ Swi4 $\geq$ 4.34                        | 1.07E-6  |
| Fkh2 $\geq$ 4.07 $\cap$ Swi4 $\geq$ 4.34                        | 2.68E-6  |
| Mal13 $\geq$ 3.54 $\cap$ Swi4 $\geq$ 4.34                       | 4.93E-6  |
| Ash1 $\geq$ 3.04 $\cap$ Swi4 $\geq$ 4.66                        | 5.13E-6  |
| Phd1 $\geq$ 2.67 $\cap$ Swi4 $\geq$ 4.34                        | 2.39E-5  |
| Grf10(pho2) $\geq$ 2.44 $\cap$ Swi4 $\geq$ 4.34                 | 2.39E-5  |
| Cin5 $\geq$ 2.47 $\cap$ Met4 $\geq$ 2.33                        | 2.44E-5  |
| Mth1 $\geq$ 2.42 $\cap$ Swi4 $\geq$ 4.34                        | 2.49E-5  |
| Ace2 $\geq$ 4.02 $\cap$ Fkh1 $\geq$ 3.41                        | 5.77E-5  |
| Cin5 $\geq$ 2.47                                                | 9.14E-5  |
| Rap1 $\geq$ 2.51 $\cap$ Swi4 $\geq$ 4.34                        | 1.13E-4  |
| Cin5 $\geq$ 2.41 $\cap$ Gat1 $\geq$ 2.5                         | 1.15E-4  |
| Ace2 $\geq$ 4.42                                                | 1.16E-4  |
| Rgm1 $\geq$ 2.33 $\cap$ Swi4 $\geq$ 4.66                        | 2.69E-4  |
| Fkh2 $\geq$ 9.12                                                | 2.72E-4  |
| Hir2 $\geq$ 2.72                                                | 4.48E-4  |
| Met4 $\geq$ 4.51                                                | 5.26E-4  |
| Hir2 $\geq$ 3.1 $\cap$ Ino4 $\geq$ 2.49                         | 5.26E-4  |
| Cin5 $\geq$ 2.47 $\cap$ Fkh1 $\geq$ 2.81                        | 5.26E-4  |
| Cha4 $\geq$ 2.3 $\cap$ Sum1 $\geq$ 2.54                         | 5.26E-4  |
| Rtg1 $\geq$ 2.35 $\cap$ Sfp1 $\geq$ 2.9                         | 5.31E-4  |
| Ndd1 $\geq$ 2.76 $\cap$ Swi4 $\geq$ 4.34                        | 5.31E-4  |
| Abf1 $\geq$ 2.42 $\cap$ Ace2 $\geq$ 3.15                        | 5.42E-4  |
| Skol $\geq$ 2.72 $\cap$ Sok2 $\geq$ 2.65                        | 5.76E-4  |
| Sum1 $\geq$ 3.3                                                 | 6.69E-4  |
| Ash1 $\geq$ 2.8 $\cap$ Mth1 $\geq$ 2.42 $\cap$ Swi4 $\geq$ 4.66 | 7.47E-4  |

| 190min                                                            | <i>p</i> |
|-------------------------------------------------------------------|----------|
| Swi4 $\geq$ 2.33                                                  | 3.59E-11 |
| Hsf1 $\geq$ 3.32 $\cap$ Swi4 $\geq$ 2.33                          | 4.75E-11 |
| Ash1 $\geq$ 2.63 $\cap$ Swi4 $\geq$ 4.61                          | 1.69E-10 |
| Hsf1 $\geq$ 3.32                                                  | 2.44E-8  |
| Ash1 $\geq$ 2.63                                                  | 2.53E-7  |
| Mal13 $\geq$ 3.04 $\cap$ Swi4 $\geq$ 3.06                         | 3.89E-7  |
| Swi4 $\geq$ 2.33 $\cap$ Swi6 $\geq$ 2.35                          | 4.37E-6  |
| Swi6 $\geq$ 3.19                                                  | 4.64E-6  |
| Hir2 $\geq$ 3.1 $\cap$ Swi4 $\geq$ 2.33                           | 4.98E-6  |
| Grf10(pho2) $\geq$ 5.15 $\cap$ Swi4 $\geq$ 2.33                   | 4.98E-6  |
| Ino4 $\geq$ 2.3 $\cap$ Swi4 $\geq$ 3.06                           | 2.14E-5  |
| Gcn4 $\geq$ 3.08 $\cap$ Sum1 $\geq$ 3.27                          | 6.01E-5  |
| Ste12 $\geq$ 2.65 $\cap$ Swi4 $\geq$ 2.33                         | 6.07E-5  |
| Mth1 $\geq$ 2.92 $\cap$ Rgm1 $\geq$ 2.3 $\cap$ Swi4 $\geq$ 2.33   | 6.07E-5  |
| Met4 $\geq$ 3.51 $\cap$ Swi4 $\geq$ 2.33                          | 6.13E-5  |
| Rgm1 $\geq$ 2.3 $\cap$ Swi4 $\geq$ 2.33                           | 1.08E-4  |
| Ash1 $\geq$ 3.04 $\cap$ Mal13 $\geq$ 2.39 $\cap$ Swi4 $\geq$ 2.33 | 1.13E-4  |
| Ash1 $\geq$ 2.8 $\cap$ Swi4 $\geq$ 2.33 $\cap$ Swi6 $\geq$ 3.19   | 1.13E-4  |
| Met4 $\geq$ 3.19                                                  | 1.45E-4  |
| Phd1 $\geq$ 5.08                                                  | 2.83E-4  |
| Cin5 $\geq$ 2.63                                                  | 4.39E-4  |
| Fkh2 $\geq$ 4.07 $\cap$ Swi4 $\geq$ 2.33                          | 5.11E-4  |
| Hir2 $\geq$ 2.72                                                  | 5.31E-4  |
| Gcn4 $\geq$ 3.08                                                  | 5.48E-4  |
| Met4 $\geq$ 3.19 $\cap$ Reb1 $\geq$ 6.38                          | 7.1E-4   |
| Gat1 $\geq$ 2.5 $\cap$ Phd1 $\geq$ 5.08                           | 7.1E-4   |
| Mal13 $\geq$ 3.04 $\cap$ Phd1 $\geq$ 2.94 $\cap$ Swi4 $\geq$ 2.33 | 7.17E-4  |
| Gcn4 $\geq$ 3.08 $\cap$ Swi4 $\geq$ 2.33                          | 7.25E-4  |
| Cin5 $\geq$ 2.3 $\cap$ Mal13 $\geq$ 3.32                          | 7.32E-4  |
| Met4 $\geq$ 2.33 $\cap$ Phd1 $\geq$ 5.08                          | 7.47E-4  |

| 200min                                                          | <i>p</i> |
|-----------------------------------------------------------------|----------|
| Swi4 $\geq$ 2.33                                                | 7.58E-10 |
| Swi4 $\geq$ 4.66 $\cap$ Swi6 $\geq$ 2.86                        | 2.35E-9  |
| Fkh2 $\geq$ 4.07 $\cap$ Swi4 $\geq$ 4.66                        | 2.95E-8  |
| Ash1 $\geq$ 2.63 $\cap$ Swi4 $\geq$ 3.73                        | 3.29E-8  |
| Ash1 $\geq$ 2.8 $\cap$ Swi6 $\geq$ 2.35                         | 1.71E-7  |
| Ste12 $\geq$ 2.32 $\cap$ Swi4 $\geq$ 4.66                       | 3.7E-7   |
| Ash1 $\geq$ 3.04                                                | 3.89E-7  |
| Met4 $\geq$ 2.72                                                | 4.89E-7  |
| Hsf1 $\geq$ 2.86 $\cap$ Swi4 $\geq$ 2.33                        | 9.38E-7  |
| Ash1 $\geq$ 2.8 $\cap$ Swi4 $\geq$ 4.66 $\cap$ Swi6 $\geq$ 2.86 | 2.42E-6  |
| Ash1 $\geq$ 2.8 $\cap$ Mbp1 $\geq$ 3.12                         | 4.37E-6  |
| Fkh2 $\geq$ 4.07                                                | 4.55E-6  |
| Phd1 $\geq$ 4.02                                                | 7.5E-6   |
| Ndd1 $\geq$ 3.24 $\cap$ Swi4 $\geq$ 2.33                        | 2.17E-5  |
| Mbp1 $\geq$ 3.12 $\cap$ Swi4 $\geq$ 2.33                        | 2.17E-5  |
| Ino4 $\geq$ 3.06 $\cap$ Swi4 $\geq$ 2.33                        | 2.17E-5  |
| Met4 $\geq$ 2.33 $\cap$ Phd1 $\geq$ 5.08                        | 5.55E-5  |
| Grf10(pho2) $\geq$ 5.15 $\cap$ Swi4 $\geq$ 4.66                 | 5.55E-5  |
| Ash1 $\geq$ 2.8 $\cap$ Mth1 $\geq$ 2.92 $\cap$ Swi4 $\geq$ 4.66 | 5.55E-5  |
| Mth1 $\geq$ 2.42 $\cap$ Swi4 $\geq$ 4.66                        | 1.05E-4  |
| Met4 $\geq$ 3.51 $\cap$ Swi4 $\geq$ 2.33                        | 1.05E-4  |
| Ash1 $\geq$ 2.63 $\cap$ Met4 $\geq$ 3.27                        | 1.05E-4  |
| Ash1 $\geq$ 3.08 $\cap$ Phd1 $\geq$ 5.08                        | 2.59E-4  |
| Ino2 $\geq$ 3.61                                                | 5.05E-4  |
| Ino2 $\geq$ 2.31 $\cap$ Swi4 $\geq$ 2.33                        | 5.05E-4  |
| Gat1 $\geq$ 2.38 $\cap$ Met4 $\geq$ 2.72                        | 5.05E-4  |
| Grf10(pho2) $\geq$ 2.44 $\cap$ Met4 $\geq$ 2.72                 | 5.16E-4  |
| Ash1 $\geq$ 2.63 $\cap$ Ino4 $\geq$ 2.47                        | 5.26E-4  |
| Cin5 $\geq$ 2.58                                                | 6.43E-4  |

| 210min                                          | <i>p</i> |
|-------------------------------------------------|----------|
| Swi4 $\geq$ 3.06                                | 1.92E-8  |
| Ndd1 $\geq$ 3.24                                | 1.21E-7  |
| Fkh2 $\geq$ 2.8                                 | 1.21E-7  |
| Ash1 $\geq$ 2.8                                 | 2.11E-7  |
| Ash1 $\geq$ 2.63 $\cap$ Ndd1 $\geq$ 3.51        | 3.25E-7  |
| Hsf1 $\geq$ 3.38                                | 1.83E-5  |
| Ndd1 $\geq$ 2.53 $\cap$ Swi4 $\geq$ 2.33        | 1.92E-5  |
| Hsf1 $\geq$ 2.65 $\cap$ Swi4 $\geq$ 3.06        | 1.92E-5  |
| Ash1 $\geq$ 2.63 $\cap$ Swi4 $\geq$ 3.06        | 1.92E-5  |
| Met4 $\geq$ 3.1                                 | 2.75E-5  |
| Fkh2 $\geq$ 3.24 $\cap$ Mbp1 $\geq$ 3.17        | 5.44E-5  |
| Gat1 $\geq$ 2.65 $\cap$ Swi4 $\geq$ 3.06        | 5.49E-5  |
| Cin5 $\geq$ 2.78 $\cap$ Swi4 $\geq$ 3.06        | 5.49E-5  |
| Mcm1 $\geq$ 5.08 $\cap$ Ndd1 $\geq$ 3.51        | 5.6E-5   |
| Fkh2 $\geq$ 4.51 $\cap$ Swi4 $\geq$ 3.73        | 5.77E-5  |
| Mal13 $\geq$ 3.04                               | 9.42E-5  |
| Ino4 $\geq$ 3.06 $\cap$ Swi4 $\geq$ 3.06        | 9.42E-5  |
| Fkh1 $\geq$ 3.41                                | 9.42E-5  |
| Mth1 $\geq$ 2.3 $\cap$ Swi4 $\geq$ 2.33         | 9.81E-5  |
| Fkh2 $\geq$ 3.73 $\cap$ Ndd1 $\geq$ 2.53        | 1.02E-4  |
| Mth1 $\geq$ 3.27                                | 4.86E-4  |
| Fkh1 $\geq$ 4.93 $\cap$ Fkh2 $\geq$ 2.8         | 4.86E-4  |
| Ash1 $\geq$ 2.8 $\cap$ Cbf1 $\geq$ 2.44         | 4.86E-4  |
| Ndd1 $\geq$ 3.24 $\cap$ Swi6 $\geq$ 3.65        | 5.05E-4  |
| Mbp1 $\geq$ 3.17                                | 5.7E-4   |
| Pho4 $\geq$ 9.35                                | 6.49E-4  |
| Ash1 $\geq$ 2.47 $\cap$ Yap3 $\geq$ 2.76        | 6.49E-4  |
| Swi4 $\geq$ 3.06 $\cap$ Yap3 $\geq$ 2.65        | 6.62E-4  |
| Grf10(pho2) $\geq$ 5.15 $\cap$ Swi4 $\geq$ 3.06 | 6.62E-4  |
| Cin5 $\geq$ 2.3 $\cap$ Fkh2 $\geq$ 3.24         | 6.62E-4  |
| Hap4 $\geq$ 2.42 $\cap$ Ino4 $\geq$ 3.08        | 6.82E-4  |
| Ecm22 $\geq$ 2.4 $\cap$ Swi4 $\geq$ 3.73        | 6.89E-4  |

| 220min                                                          | <i>p</i> |
|-----------------------------------------------------------------|----------|
| Swi4 $\geq$ 4.66                                                | 1.2E-10  |
| Fkh2 $\geq$ 4.07 $\cap$ Swi4 $\geq$ 4.66                        | 3.01E-9  |
| Ash1 $\geq$ 2.42                                                | 1.81E-8  |
| Ndd1 $\geq$ 3.24 $\cap$ Swi4 $\geq$ 3.06                        | 3.71E-8  |
| Ash1 $\geq$ 2.42 $\cap$ Swi4 $\geq$ 3.73                        | 4.14E-8  |
| Fkh2 $\geq$ 3.27                                                | 8.94E-8  |
| Ndd1 $\geq$ 3.65                                                | 2.31E-7  |
| Grf10(pho2) $\geq$ 2.44 $\cap$ Swi4 $\geq$ 4.66                 | 4.43E-7  |
| Met4 $\geq$ 2.96                                                | 4.52E-7  |
| Phd1 $\geq$ 2.6                                                 | 4.99E-7  |
| Ash1 $\geq$ 2.42 $\cap$ Fkh2 $\geq$ 3.27                        | 5.24E-6  |
| Rap1 $\geq$ 2.47 $\cap$ Swi4 $\geq$ 3.73                        | 5.45E-6  |
| Swi4 $\geq$ 2.33 $\cap$ Swi6 $\geq$ 2.35                        | 5.62E-6  |
| Hsf1 $\geq$ 3.38 $\cap$ Swi4 $\geq$ 3.06                        | 2.54E-5  |
| Ste12 $\geq$ 2.32 $\cap$ Swi4 $\geq$ 4.66                       | 2.98E-5  |
| Ash1 $\geq$ 2.8 $\cap$ Swi4 $\geq$ 4.66 $\cap$ Swi6 $\geq$ 2.35 | 3.04E-5  |
| Hap4 $\geq$ 3.04 $\cap$ Hap5 $\geq$ 3.3                         | 6.25E-5  |
| Ash1 $\geq$ 2.63 $\cap$ Met4 $\geq$ 2.33                        | 1.21E-4  |
| Ash1 $\geq$ 2.42 $\cap$ Mal13 $\geq$ 3.32                       | 1.21E-4  |
| Phd1 $\geq$ 2.94 $\cap$ Rap1 $\geq$ 2.72                        | 5.76E-4  |
| Met4 $\geq$ 2.58 $\cap$ Rgm1 $\geq$ 2.3                         | 5.76E-4  |
| Grf10(pho2) $\geq$ 5.15                                         | 5.76E-4  |
| Gcr1 $\geq$ 2.54                                                | 5.76E-4  |
| Cin5 $\geq$ 2.47 $\cap$ Mal13 $\geq$ 2.3                        | 5.76E-4  |
| Ash1 $\geq$ 2.63 $\cap$ Phd1 $\geq$ 5.08                        | 5.76E-4  |
| Ash1 $\geq$ 2.3 $\cap$ Ino2 $\geq$ 2.66                         | 5.76E-4  |
| Met4 $\geq$ 2.58 $\cap$ Put3 $\geq$ 3.17                        | 5.93E-4  |
| Ash1 $\geq$ 2.63 $\cap$ Ino4 $\geq$ 3.1                         | 7.32E-4  |
| Cin5 $\geq$ 2.47                                                | 8.17E-4  |

| 230min                                                           | <i>p</i> |
|------------------------------------------------------------------|----------|
| Hsf1 $\geq$ 6.81                                                 | 2.38E-7  |
| Hap4 $\geq$ 2.75 $\cap$ Ino4 $\geq$ 2.47                         | 4.01E-7  |
| Ndd1 $\geq$ 3.24                                                 | 9.01E-7  |
| Mal13 $\geq$ 2.53 $\cap$ Mth1 $\geq$ 3.02                        | 2.32E-5  |
| Ino2 $\geq$ 2.58 $\cap$ Ino4 $\geq$ 2.47                         | 2.32E-5  |
| Swi4 $\geq$ 3.32                                                 | 2.44E-5  |
| Hap4 $\geq$ 2.75                                                 | 2.44E-5  |
| Phd1 $\geq$ 4.51                                                 | 1.14E-4  |
| Ash1 $\geq$ 3.08                                                 | 1.14E-4  |
| Hsf1 $\geq$ 2.88 $\cap$ Swi4 $\geq$ 2.47                         | 1.19E-4  |
| Ash1 $\geq$ 2.54 $\cap$ Ndd1 $\geq$ 3.24                         | 1.19E-4  |
| Ino4 $\geq$ 2.47 $\cap$ Mac1 $\geq$ 4.07                         | 2.77E-4  |
| Hsf1 $\geq$ 6.81 $\cap$ Msn4 $\geq$ 2.31                         | 2.83E-4  |
| Mth1 $\geq$ 3.02 $\cap$ Rgm1 $\geq$ 2.3                          | 5.48E-4  |
| Mal13 $\geq$ 2.78 $\cap$ Ndd1 $\geq$ 3.24                        | 5.48E-4  |
| Ino4 $\geq$ 2.47 $\cap$ Swi4 $\geq$ 3.32                         | 5.48E-4  |
| Ino4 $\geq$ 2.47 $\cap$ Phd1 $\geq$ 3.41                         | 5.48E-4  |
| Cin5 $\geq$ 2.73 $\cap$ Hsf1 $\geq$ 2.88                         | 5.48E-4  |
| Ash1 $\geq$ 2.47 $\cap$ Ino4 $\geq$ 2.47                         | 5.48E-4  |
| Ash1 $\geq$ 2.44 $\cap$ Mth1 $\geq$ 3.27                         | 5.48E-4  |
| Cin5 $\geq$ 4.65                                                 | 5.64E-4  |
| Ino4 $\geq$ 3.86                                                 | 6.62E-4  |
| Fkh1 $\geq$ 3.41                                                 | 6.62E-4  |
| Ino4 $\geq$ 2.63 $\cap$ Rtg1 $\geq$ 2.69                         | 7.17E-4  |
| Ino4 $\geq$ 2.47 $\cap$ Swi6 $\geq$ 2.86                         | 7.17E-4  |
| Abf1 $\geq$ 4.02 $\cap$ Ndd1 $\geq$ 3.24                         | 7.17E-4  |
| Ino4 $\geq$ 2.47 $\cap$ Ndd1 $\geq$ 3.24 $\cap$ Phd1 $\geq$ 3.41 | 7.25E-4  |
| Ndd1 $\geq$ 3.24 $\cap$ Phd1 $\geq$ 6.5                          | 7.32E-4  |
| Ino4 $\geq$ 2.83 $\cap$ Ndd1 $\geq$ 3.24                         | 8.01E-4  |
| Mcm1 $\geq$ 2.62 $\cap$ Ndd1 $\geq$ 3.24                         | 8.17E-4  |

| 240min                                                         | <i>p</i> |
|----------------------------------------------------------------|----------|
| Swi4 $\geq$ 4.61                                               | 2.85E-7  |
| Cin5 $\geq$ 2.47 $\cap$ Met4 $\geq$ 2.3                        | 1.36E-6  |
| Cin5 $\geq$ 3.12                                               | 1.66E-6  |
| Hsf1 $\geq$ 4.14                                               | 3.14E-6  |
| Cin5 $\geq$ 2.47 $\cap$ Ecm22 $\geq$ 2.4                       | 5.67E-6  |
| Cin5 $\geq$ 2.47 $\cap$ Ndd1 $\geq$ 2.53                       | 6.21E-6  |
| Cin5 $\geq$ 2.73 $\cap$ Ino4 $\geq$ 2.58                       | 6.33E-6  |
| Cin5 $\geq$ 2.47 $\cap$ Yap6 $\geq$ 2.69                       | 6.33E-6  |
| Cin5 $\geq$ 2.47 $\cap$ Mth1 $\geq$ 2.72                       | 6.33E-6  |
| Ash1 $\geq$ 2.3 $\cap$ Cin5 $\geq$ 2.47                        | 6.33E-6  |
| Cin5 $\geq$ 2.47 $\cap$ Ino2 $\geq$ 2.31                       | 6.46E-6  |
| Cin5 $\geq$ 2.47 $\cap$ Phd1 $\geq$ 2.56                       | 2.87E-5  |
| Cin5 $\geq$ 2.47 $\cap$ Hsf1 $\geq$ 2.65                       | 2.87E-5  |
| Ash1 $\geq$ 3.38                                               | 4.63E-5  |
| Cin5 $\geq$ 2.47 $\cap$ Fkh2 $\geq$ 5.17                       | 6.51E-5  |
| Gat1 $\geq$ 2.65 $\cap$ Swi4 $\geq$ 4.61                       | 6.57E-5  |
| Cin5 $\geq$ 2.47 $\cap$ Fkh2 $\geq$ 2.6 $\cap$ Rap1 $\geq$ 3.0 | 6.57E-5  |
| Cin5 $\geq$ 2.47 $\cap$ Fkh1 $\geq$ 3.41                       | 6.57E-5  |
| Swi4 $\geq$ 5.12 $\cap$ Swi6 $\geq$ 2.86                       | 1.03E-4  |
| Cin5 $\geq$ 2.47 $\cap$ Gat1 $\geq$ 2.6                        | 1.32E-4  |
| Ino4 $\geq$ 3.24 $\cap$ Swi4 $\geq$ 3.73                       | 1.35E-4  |
| Hsf1 $\geq$ 4.14 $\cap$ Swi4 $\geq$ 3.73                       | 1.35E-4  |
| Hsf1 $\geq$ 4.14 $\cap$ Met4 $\geq$ 3.73                       | 1.35E-4  |
| Gat1 $\geq$ 2.6 $\cap$ Ino4 $\geq$ 3.06                        | 1.35E-4  |
| Ndd1 $\geq$ 2.53 $\cap$ Swi4 $\geq$ 3.73                       | 1.36E-4  |
| Ndd1 $\geq$ 3.58                                               | 1.88E-4  |
| Stb1 $\geq$ 2.73                                               | 1.9E-4   |
| Hap4 $\geq$ 3.47                                               | 1.9E-4   |
| Phd1 $\geq$ 4.51                                               | 1.94E-4  |
| Ace2 $\geq$ 2.36 $\cap$ Cin5 $\geq$ 2.47                       | 3.07E-4  |
| Ash1 $\geq$ 3.0 $\cap$ Swi4 $\geq$ 2.48                        | 6.11E-4  |
| Ash1 $\geq$ 3.04 $\cap$ Ecm22 $\geq$ 2.4                       | 6.11E-4  |
| Nrg1 $\geq$ 4.34                                               | 6.17E-4  |
| Mss11 $\geq$ 2.45 $\cap$ Sig1 $\geq$ 3.77                      | 6.17E-4  |
| Gat1 $\geq$ 2.65 $\cap$ Ndd1 $\geq$ 2.53                       | 6.17E-4  |
| Cin5 $\geq$ 2.73 $\cap$ Rgm1 $\geq$ 2.3                        | 6.17E-4  |
| Fkh2 $\geq$ 5.17                                               | 7.77E-4  |
| Cbf1 $\geq$ 3.91                                               | 7.77E-4  |

| 250min                                    | <i>p</i> |
|-------------------------------------------|----------|
| Hsf1 $\geq$ 3.41                          | 8.92E-7  |
| Hap4 $\geq$ 2.72 $\cap$ Ino4 $\geq$ 2.58  | 4.69E-6  |
| Hsf1 $\geq$ 3.41 $\cap$ Msn4 $\geq$ 3.41  | 4.74E-6  |
| Hsf1 $\geq$ 2.39 $\cap$ Swi4 $\geq$ 2.7   | 2.1E-5   |
| Ace2 $\geq$ 19.26                         | 5.6E-5   |
| Cad1 $\geq$ 3.08 $\cap$ Pho4 $\geq$ 3.02  | 5.77E-5  |
| Ino4 $\geq$ 2.98                          | 8.03E-5  |
| Ace2 $\geq$ 4.42 $\cap$ Fkh2 $\geq$ 2.94  | 8.96E-5  |
| Hsf1 $\geq$ 2.39 $\cap$ Mal13 $\geq$ 2.32 | 1.15E-4  |
| Yap6 $\geq$ 3.3                           | 1.39E-4  |
| Fkh1 $\geq$ 3.41                          | 1.46E-4  |
| Ndd1 $\geq$ 2.63                          | 1.51E-4  |
| Mal13 $\geq$ 2.81                         | 3.9E-4   |
| Pho4 $\geq$ 3.02                          | 5.31E-4  |
| Hir2 $\geq$ 2.72                          | 5.31E-4  |
| Fkh1 $\geq$ 3.41 $\cap$ Mbp1 $\geq$ 2.3   | 5.48E-4  |
| Cin5 $\geq$ 3.22 $\cap$ Yap6 $\geq$ 3.3   | 5.48E-4  |
| Swi4 $\geq$ 3.06                          | 5.59E-4  |

| 270min                                    | <i>p</i> |
|-------------------------------------------|----------|
| Fkh2 $\geq$ 2.49                          | 4.09E-7  |
| Fkh1 $\geq$ 3.51 $\cap$ Fkh2 $\geq$ 2.49  | 1.09E-6  |
| Fkh1 $\geq$ 3.51 $\cap$ Mbp1 $\geq$ 2.3   | 2.79E-6  |
| Hap4 $\geq$ 2.72 $\cap$ Ino4 $\geq$ 2.58  | 5.34E-6  |
| Ino4 $\geq$ 2.98                          | 8.05E-6  |
| Fkh1 $\geq$ 3.51                          | 8.72E-6  |
| Mal13 $\geq$ 3.22                         | 2.49E-5  |
| Hsf1 $\geq$ 2.65 $\cap$ Swi4 $\geq$ 3.06  | 2.49E-5  |
| Yap6 $\geq$ 3.0                           | 2.59E-5  |
| Hsf1 $\geq$ 2.65                          | 2.81E-5  |
| Swi4 $\geq$ 2.7                           | 3.14E-5  |
| Cin5 $\geq$ 3.12                          | 3.75E-5  |
| Ace2 $\geq$ 3.96 $\cap$ Fkh2 $\geq$ 2.94  | 6.07E-5  |
| Mal13 $\geq$ 2.81 $\cap$ Swi4 $\geq$ 3.12 | 6.38E-5  |
| Gat1 $\geq$ 2.73 $\cap$ Ino4 $\geq$ 2.58  | 6.38E-5  |
| Ace2 $\geq$ 12.68                         | 6.51E-5  |
| Skn7 $\geq$ 2.8                           | 1.52E-4  |
| Sig1 $\geq$ 2.44                          | 3.32E-4  |
| Ino4 $\geq$ 2.83 $\cap$ Mal13 $\geq$ 2.43 | 5.53E-4  |
| Cin5 $\geq$ 3.22 $\cap$ Yap6 $\geq$ 3.0   | 5.53E-4  |
| Swi6 $\geq$ 4.27                          | 5.7E-4   |
| Mth1 $\geq$ 2.42 $\cap$ Rtg1 $\geq$ 2.69  | 5.7E-4   |
| Mbp1 $\geq$ 4.61                          | 5.7E-4   |
| Gat1 $\geq$ 2.81 $\cap$ Mal13 $\geq$ 2.43 | 5.7E-4   |
| Gat1 $\geq$ 2.56 $\cap$ Rtg1 $\geq$ 2.69  | 5.7E-4   |
| Fkh2 $\geq$ 2.49 $\cap$ Mbp1 $\geq$ 4.61  | 5.7E-4   |
| Cin5 $\geq$ 2.56 $\cap$ Met4 $\geq$ 2.3   | 5.7E-4   |
| Sfl1 $\geq$ 3.22                          | 5.87E-4  |
| Ino4 $\geq$ 2.58 $\cap$ Skn7 $\geq$ 2.62  | 5.87E-4  |
| Ash1 $\geq$ 2.54 $\cap$ Mal13 $\geq$ 3.04 | 5.87E-4  |
| Ndd1 $\geq$ 2.53                          | 6.11E-4  |
| Hap4 $\geq$ 2.72                          | 7.17E-4  |

| 290min                                                            | <i>p</i> |
|-------------------------------------------------------------------|----------|
| Hsf1 $\geq$ 2.39 $\cap$ Mal13 $\geq$ 2.32                         | 9.33E-9  |
| Hsf1 $\geq$ 2.39                                                  | 2.29E-7  |
| Gat1 $\geq$ 2.56 $\cap$ Ino4 $\geq$ 2.48                          | 1.27E-6  |
| Mal13 $\geq$ 3.04                                                 | 2.6E-6   |
| Mal13 $\geq$ 2.32 $\cap$ Swi4 $\geq$ 5.12                         | 3.08E-6  |
| Ace2 $\geq$ 3.96                                                  | 5.67E-6  |
| Hsf1 $\geq$ 2.39 $\cap$ Swi4 $\geq$ 3.06                          | 5.84E-6  |
| Hap4 $\geq$ 2.72 $\cap$ Ino4 $\geq$ 2.48                          | 5.9E-6   |
| Gat1 $\geq$ 2.66 $\cap$ Mal13 $\geq$ 2.32                         | 6.27E-6  |
| Swi4 $\geq$ 4.61                                                  | 1.03E-5  |
| Ino4 $\geq$ 3.41                                                  | 1.09E-5  |
| Ace2 $\geq$ 3.96 $\cap$ Fkh1 $\geq$ 3.41                          | 3.2E-5   |
| Swi6 $\geq$ 3.02                                                  | 4.59E-5  |
| Pho4 $\geq$ 9.35                                                  | 6.51E-5  |
| Mal13 $\geq$ 2.32 $\cap$ Pho4 $\geq$ 4.99                         | 6.64E-5  |
| Ino4 $\geq$ 2.48 $\cap$ Yap3 $\geq$ 2.55                          | 6.71E-5  |
| Hsf1 $\geq$ 3.41 $\cap$ Mal13 $\geq$ 2.32 $\cap$ Swi4 $\geq$ 5.12 | 6.71E-5  |
| Ino4 $\geq$ 2.66 $\cap$ Mal13 $\geq$ 2.32                         | 1.27E-4  |
| Mal13 $\geq$ 2.32 $\cap$ Ndd1 $\geq$ 2.76                         | 1.3E-4   |
| Ino4 $\geq$ 2.48 $\cap$ Skn7 $\geq$ 2.62                          | 1.3E-4   |
| Hsf1 $\geq$ 2.39 $\cap$ Skn7 $\geq$ 3.86                          | 1.3E-4   |
| Mal13 $\geq$ 2.32 $\cap$ Skn7 $\geq$ 3.32                         | 1.34E-4  |
| Ace2 $\geq$ 3.96 $\cap$ Swi6 $\geq$ 2.56                          | 1.34E-4  |
| Ecm22 $\geq$ 2.3 $\cap$ Ino4 $\geq$ 2.48                          | 1.36E-4  |
| Gat1 $\geq$ 2.56 $\cap$ Ino2 $\geq$ 2.31 $\cap$ Ino4 $\geq$ 2.54  | 1.39E-4  |
| Skn7 $\geq$ 3.19                                                  | 1.45E-4  |
| Yap6 $\geq$ 3.0                                                   | 1.92E-4  |
| Gat1 $\geq$ 2.73 $\cap$ Ino4 $\geq$ 2.48 $\cap$ Mal13 $\geq$ 2.43 | 3.01E-4  |
| Ace2 $\geq$ 4.42 $\cap$ Fkh2 $\geq$ 2.94                          | 3.13E-4  |
| Gcn4 $\geq$ 3.08                                                  | 5.42E-4  |
| Mal13 $\geq$ 2.32 $\cap$ Swi6 $\geq$ 4.27                         | 5.87E-4  |
| Gat1 $\geq$ 2.56 $\cap$ Ino4 $\geq$ 2.98 $\cap$ Mth1 $\geq$ 2.35  | 5.99E-4  |
| Fkh2 $\geq$ 2.6 $\cap$ Mal13 $\geq$ 2.32                          | 5.99E-4  |
| Ash1 $\geq$ 2.63 $\cap$ Ino4 $\geq$ 2.48                          | 5.99E-4  |
| Ino2 $\geq$ 2.31 $\cap$ Ino4 $\geq$ 2.48                          | 6.11E-4  |
| Cbf1 $\geq$ 5.65                                                  | 6.11E-4  |
| Mal13 $\geq$ 2.32 $\cap$ Rme1 $\geq$ 2.3                          | 6.24E-4  |
| Grf10(pho2) $\geq$ 2.44 $\cap$ Mal13 $\geq$ 2.32                  | 6.24E-4  |
| Ino2 $\geq$ 3.15                                                  | 6.82E-4  |
